# Supplementary material for: A general Fe-catalysed azidation of iododifluoroketones and its utilization for the synthesis of gem-difluoromethylenated triazoles
Source: Royal Society of Chemistry journal article supplement (doi:10.1039/d3qo02088f), 2024-01-01
Supplement: d3qo02088f1.pdf [file d3qo02088f1.pdf]

## Supplementary Information

### A general Fe-catalysed azidation of iododifluoroketones and its utilization for synthesis of *gem*-difluoromethylenated triazoles

Xia Wang,<sup>†</sup> Shixun Liu,<sup>†</sup> Shibo Xu,<sup>\*,†,‡</sup> Shiguang Wu,<sup>†</sup> Jingjing Wu,<sup>\*,†,‡</sup> and Fanhong Wu<sup>\*,†</sup>

<sup>†</sup>*School of Chemical and Environmental Engineering and Shanghai Engineering Research Center of Green Fluoropharmaceutical Technology, Shanghai Institute of Technology, Shanghai 201418, China*

<sup>‡</sup>*Key Laboratory of Organofluorine Chemistry, Shanghai Institute of Organic Chemistry, Chinese Academy of Sciences, Shanghai 200032, China*

*s\_xu@sit.edu.cn; wujj@sit.edu.cn; wfh@sit.edu.cn*

## Contents

|                                           |        |
|-------------------------------------------|--------|
| <b>Instrumentation and Chemicals</b>      | S2     |
| <b>Experimental Procedures</b>            | S3–S4  |
| <b>Characterization Data for Products</b> | S5–S70 |
| <b>References</b>                         | S71    |

### Instrumentation and Chemicals

$^1\text{H}$ ,  $^{13}\text{C}\{^1\text{H}\}$ , and  $^{19}\text{F}\{^1\text{H}\}$  NMR spectra were recorded at 400 MHz, 100 MHz, and 376 MHz, respectively, for  $\text{CDCl}_3$  solutions. High-resolution mass spectra (HRMS) were recorded on a FTMS instrument in ESI mode and reported as  $m/z$ . Melting points were obtained on digital melting point apparatus without correction. Unless otherwise stated, all reagents were commercially purchased and used without further purification. Substrates **1t** and **3f** was synthesized according to procedures reported previously.<sup>[S1]</sup>

## Experimental Procedures

### 1. Preparation of 2-iodo-2,2-difluoroacetophenone 1a-1r

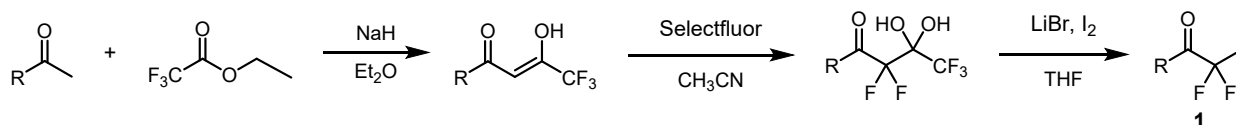

The 2-iodo-2,2-difluoroacetophenone **1a-1r** were prepared according to the reported procedure.<sup>[S2]</sup> They are all known compounds. As shown above, the intermediates enols were obtained from the reaction of ethyl 2,2,2-trifluoroacetate and ketones. The enols reacted with Selectfluor to form fluorinated *gem*-diols, which then reacted with I<sub>2</sub> to afford 2-iodo-2,2-difluoroacetophenone **1a-1r** using the trifluoroacetate release conditions.

### 2. Procedure for iron-catalysed azidation of iododifluoroketones (Scheme 2)

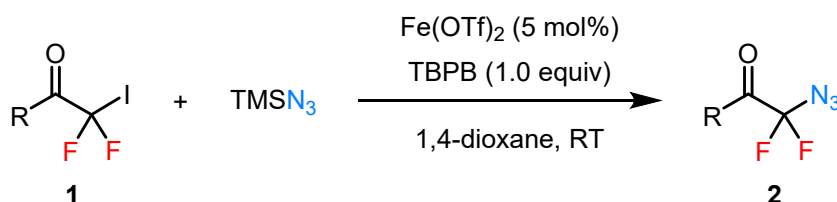

An oven-dried tube was charged with Fe(OTf)<sub>2</sub> (0.01 mmol, 5 mol%). The tube was evacuated and backfilled with nitrogen (repeated three times). Then, 2-iodo-2,2-difluoroacetophenone derivatives **1** (0.2 mmol) dissolved in 1,4-dioxane (2.0 mL), TMSN<sub>3</sub> (0.24 mmol, 1.2 equiv) and TBPB (0.2 mmol, 1.0 equiv) were added into the tube under the protection of nitrogen. The reaction mixture was stirring at 25 °C for 12 h. After the reaction was completed, evaporation of the solvent was performed on a rotary evaporator, and the reaction mixture was added directly to a column loaded with silica gel pre-eluted with the mobile phase solvent system (petroleum ether/ethyl acetate, 100:1). Chromatography afforded the desired products **2a-2r**.

A 4.0 mmol scale reaction of 1a (Scheme 4a): An oven-dried tube was charged with Fe(OTf)<sub>2</sub> (0.2 mmol, 5mol %). The tube was evacuated and backfilled with nitrogen (repeated three times). Then, 2-iodo-2,2-difluoroacetophenone derivatives **1** (4.0 mmol) dissolved in 1,4-dioxane (30 mL), TMSN<sub>3</sub> (4.8 mmol, 1.2 equiv) and TBPB (4.0 mmol, 1.0 equiv) were added into the tube under the protection of nitrogen. The reaction mixture was stirring at 25 °C for 12 h. After the reaction was completed, evaporation of the solvent was performed on a rotary evaporator, and the reaction mixture was added directly to a column loaded with silica gel pre-eluted with the mobile phase solvent system (petroleum ether/ethyl acetate, 100:1). Chromatography afforded the desired product **2a** (81%, 640.0

mg).

### 3. Procedure for the synthesis of *gem*-difluoromethylenated triazoles (Scheme 3)

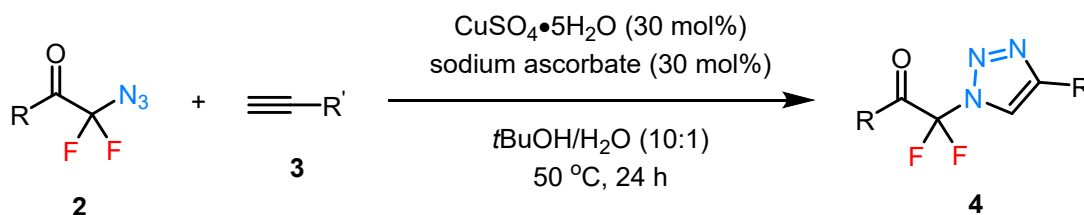

An oven-dried tube was charged with CuSO<sub>4</sub>·5H<sub>2</sub>O (0.06 mmol, 30 mol%), sodium ascorbate (0.06 mmol, 30 mol%), and *tert*-butanol/water (10:1, 2.0 mL in total). The azidation product **2** (0.2 mmol) and alkynes **3** (0.22 mmol, 1.1 equiv) were sequentially added to the same reaction vessel, and the mixture was left to stir for 24 h at 50 °C (reaction monitored by TLC following the consumption of azide and appearance of triazole using petroleum ether/ethyl acetate, 5:1). Upon completion, the reaction mixture was added directly to a column loaded with silica gel pre-eluted with the mobile phase solvent system (petroleum ether/ethyl acetate, 5:1). Chromatography afforded the desired triazole products **4**.

### 4. One-pot, two-step procedure for the synthesis of *gem*-difluoromethylenated triazoles (Scheme 4b)

An oven-dried tube was charged with Fe(OTf)<sub>2</sub> (0.01 mmol, 5 mol%). The tube was evacuated and backfilled with nitrogen (repeated three times). Then, 2-iodo-2,2-difluoroacetophenone derivatives **1** (0.2 mmol) dissolved in 1,4-dioxane (2.0 mL), TMSN<sub>3</sub> (0.24 mmol, 1.2 equiv) and TBPB (0.2 mmol, 1.0 equiv) were added into the tube under the protection of nitrogen. The reaction mixture was stirring at 25 °C for 12 h. After the reaction was completed, evaporation of the solvent was performed on a rotary evaporator, followed by the addition of *tert*-butanol/water (10:1, 2.0 mL in total), alkyne (0.22 mmol), CuSO<sub>4</sub>·5H<sub>2</sub>O (0.06 mmol, 30 mol%), and sodium ascorbate (0.06 mmol, 30 mol%) to the same reaction vessel, and the mixture was left to stir for 24 h at 50 °C (reaction monitored by TLC following the consumption of azide and appearance of triazole using petroleum ether/ethyl acetate, 5:1). Upon completion, the reaction mixture was added directly to a column loaded with silica gel pre-eluted with the mobile phase solvent system (petroleum ether/ethyl acetate, 5:1). Chromatography afforded the desired triazole products **4**.

## Characterization Data for Substrates and Products

$^1\text{H}$ ,  $^{13}\text{C}\{^1\text{H}\}$ , and  $^{19}\text{F}\{^1\text{H}\}$  NMR spectra for all compounds are attached in the last part.

The characterization data for **2a** and **2l** are consistent with that reported in previous work.<sup>[S3,S4]</sup>

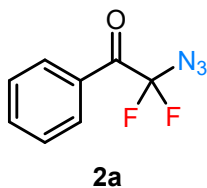

### 2-Azido-2,2-difluoro-1-phenylethan-1-one (**2a**)

Colorless oil (96%), purified by silica-gel column chromatography (PE/EA).

$^1\text{H}$  NMR (400 MHz,  $\text{CDCl}_3$ ):  $\delta$  8.10 (d,  $J = 8.0$  Hz, 2H), 7.69 (t,  $J = 8.0$  Hz, 1H), 7.53 (t,  $J = 8.0$  Hz, 2H).  $^{13}\text{C}$  NMR (100 MHz,  $\text{CDCl}_3$ ):  $\delta$  183.25 (t,  $^2J_{\text{C-F}} = 34.0$  Hz), 135.17, 130.42 (t,  $^3J = 3.0$  Hz), 128.91, 128.57, 115.47 (t,  $^1J = 272.0$  Hz).  $^{19}\text{F}$  NMR (376 MHz,  $\text{CDCl}_3$ ):  $\delta$  -78.02 (s, 2F).

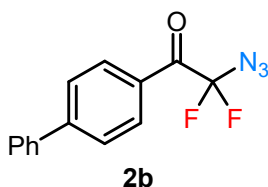

### 1-([1,1'-Biphenyl]-4-yl)-2-azido-2,2-difluoroethan-1-one (**2b**)

Colorless oil (92%), purified by silica-gel column chromatography (PE/EA).

$^1\text{H}$  NMR (400 MHz,  $\text{CDCl}_3$ ):  $\delta$  8.19 (d,  $J = 8.0$  Hz, 2H), 7.76 (d,  $J = 12.0$  Hz, 2H), 7.67-7.64 (m, 2H), 7.53-7.43 (m, 3H).  $^{13}\text{C}$  NMR (100 MHz,  $\text{CDCl}_3$ ):  $\delta$  182.85 (t,  $^2J_{\text{C-F}} = 34.0$  Hz), 147.93, 139.29, 131.12 (t,  $^3J_{\text{C-F}} = 2.5$  Hz), 129.18, 129.05, 128.90, 127.51, 127.41, 115.68 (t,  $^1J_{\text{C-F}} = 271.0$  Hz).  $^{19}\text{F}$  NMR (376 MHz,  $\text{CDCl}_3$ ):  $\delta$  -77.88 (s, 2F). HRMS (ESI)  $m/z$  calcd  $[\text{M} + \text{H}]^+$  = for  $\text{C}_{14}\text{H}_9\text{F}_2\text{N}_3\text{O}$ : 274.0792, found: 274.0800.

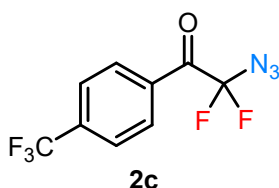

### 2-Azido-2,2-difluoro-1-(4-(trifluoromethyl)phenyl)ethan-1-one (**2c**)

Colorless oil (99%), purified by silica-gel column chromatography (PE/EA).

$^1\text{H}$  NMR (400 MHz,  $\text{CDCl}_3$ ):  $\delta$  8.20 (p,  $J = 8.0$  Hz, 2H), 7.79 (p,  $J = 8.0$  Hz, 2H).  $^{13}\text{C}$  NMR (100 MHz,  $\text{CDCl}_3$ ):  $\delta$  182.46 (t,  $^2J_{\text{C-F}} = 35.0$  Hz), 136.36 (q,  $^2J_{\text{C-F}} = 32.7$  Hz), 133.07, 130.72, 125.91 (t,  $^3J_{\text{C-F}} = 4.0$  Hz), 124.58 (q,  $^1J_{\text{C-F}} = 295.3$  Hz), 115.16 (t,  $^1J_{\text{C-F}} = 272.0$  Hz).  $^{19}\text{F}$  NMR (376 MHz,  $\text{CDCl}_3$ ):  $\delta$  -63.68 (s, 3F), -78.36 (s, 2F). HRMS (ESI)  $m/z$  calcd  $[\text{M} + \text{H}]^+$  = for  $\text{C}_9\text{H}_4\text{F}_5\text{N}_3\text{O}$ : 266.0353, found: 266.0358.

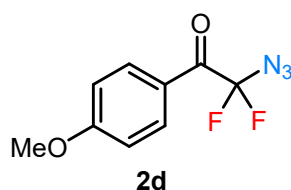

### 2-Azido-2,2-difluoro-1-(4-methoxyphenyl)ethan-1-one (2d)

Colorless oil (82%), purified by silica-gel column chromatography (PE/EA).

**<sup>1</sup>H NMR** (400 MHz, CDCl<sub>3</sub>): δ 8.06 (d, *J* = 8.0 Hz, 2H), 6.98-6.94 (m, 2H), 3.88 (s, 3H). **<sup>13</sup>C NMR** (100 MHz, CDCl<sub>3</sub>): δ 181.64 (t, <sup>2</sup>*J*<sub>C-F</sub> = 32.5 Hz), 165.25, 133.06 (t, <sup>3</sup>*J*<sub>C-F</sub> = 3.0 Hz), 123.08, 115.79 (t, <sup>1</sup>*J*<sub>C-F</sub> = 271.0 Hz), 114.30, 55.66. **<sup>19</sup>F NMR** (376 MHz, CDCl<sub>3</sub>): δ -77.63 (s, 2F). **HRMS (ESI)** *m/z* calcd [M + H]<sup>+</sup> = for C<sub>9</sub>H<sub>7</sub>F<sub>2</sub>N<sub>3</sub>O<sub>2</sub>: 228.0585, found: 228.0591.

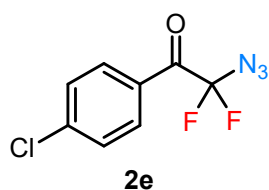

### 2-Azido-1-(4-chlorophenyl)-2,2-difluoroethan-1-one (2e)

Colorless oil (84%), purified by silica-gel column chromatography (PE/EA).

**<sup>1</sup>H NMR** (400 MHz, CDCl<sub>3</sub>): δ 8.02 (d, *J* = 8.0 Hz, 2H), 7.50 (d, *J* = 8.0 Hz, 2H). **<sup>13</sup>C NMR** (100 MHz, CDCl<sub>3</sub>): δ 182.18 (t, <sup>2</sup>*J*<sub>C-F</sub> = 34.0 Hz), 142.12, 131.81 (t, <sup>3</sup>*J*<sub>C-F</sub> = 3.0 Hz), 129.40, 128.65, 115.37 (t, <sup>1</sup>*J*<sub>C-F</sub> = 271.0 Hz). **<sup>19</sup>F NMR** (376 MHz, CDCl<sub>3</sub>): δ -77.98 (s, 2F). **HRMS (ESI)** *m/z* calcd [M + Na]<sup>+</sup> = for C<sub>8</sub>H<sub>4</sub>ClF<sub>2</sub>N<sub>3</sub>O: 253.9909, found: 253.9913.

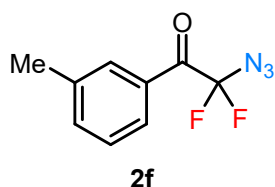

### 2-Azido-2,2-difluoro-1-(*m*-tolyl)ethan-1-one (2f)

Colorless oil (85%), purified by silica-gel column chromatography (PE/EA).

**<sup>1</sup>H NMR** (400 MHz, CDCl<sub>3</sub>): δ 7.89 (s, 2H), 7.49 (d, *J* = 8.0 Hz, 1H), 7.43-7.37 (m, 1H), 2.42 (s, 3H). **<sup>13</sup>C NMR** (100 MHz, CDCl<sub>3</sub>): δ 183.40 (t, <sup>2</sup>*J*<sub>C-F</sub> = 33.5 Hz), 138.93, 136.06, 130.77, 130.38, 128.78, 127.69 (t, <sup>3</sup>*J*<sub>C-F</sub> = 3.0 Hz), 115.57 (t, <sup>1</sup>*J*<sub>C-F</sub> = 271.5 Hz), 21.26. **<sup>19</sup>F NMR** (376 MHz, CDCl<sub>3</sub>): δ -78.03 (s, 2F). **HRMS (ESI)** *m/z* calcd [M + Na]<sup>+</sup> = for C<sub>9</sub>H<sub>7</sub>F<sub>2</sub>N<sub>3</sub>O: 234.0455, found: 234.0457.

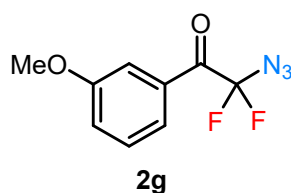

### 2-Azido-2,2-difluoro-1-(3-methoxyphenyl)ethan-1-one (2g)

Colorless oil (91%), purified by silica-gel column chromatography (PE/EA).

**<sup>1</sup>H NMR** (400 MHz, CDCl<sub>3</sub>): δ 7.69 (d, *J* = 8.0 Hz, 1H), 7.57 (s, 1H), 7.45-7.40 (m, 1H), 7.23 (d, *J* = 8.0 Hz, 1H), 3.86 (s, 3H). **<sup>13</sup>C NMR** (100 MHz, CDCl<sub>3</sub>): δ 183.12 (t, <sup>2</sup>*J*<sub>C-F</sub> = 34.0 Hz), 159.90, 131.52, 129.96, 123.09 (t, <sup>3</sup>*J*<sub>C-F</sub> = 3.5 Hz), 121.90, 115.48 (t, <sup>1</sup>*J*<sub>C-F</sub> = 272.0 Hz), 114.46, 55.55. **<sup>19</sup>F NMR** (376 MHz, CDCl<sub>3</sub>): δ -77.86 (s, 2F). **HRMS (ESI)** *m/z* calcd [M + H]<sup>+</sup> = for C<sub>9</sub>H<sub>7</sub>F<sub>2</sub>N<sub>3</sub>O<sub>2</sub>: 228.0585, found: 228.0583.

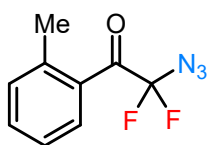

2h

### 2-Azido-2,2-difluoro-1-(*o*-tolyl)ethan-1-one (2h)

Colorless oil (94%), purified by silica-gel column chromatography (PE/EA).

**<sup>1</sup>H NMR** (400 MHz, CDCl<sub>3</sub>): δ 7.89 (d, *J* = 8.0 Hz, 1H), 7.50 (t, *J* = 8.0 Hz, 1H), 7.34-7.30 (m, 2H), 2.54 (s, 3H). **<sup>13</sup>C NMR** (100 MHz, CDCl<sub>3</sub>): δ 186.00 (t, <sup>2</sup>*J*<sub>C-F</sub> = 36.0 Hz), 141.59, 133.57, 132.43, 130.39, 130.14, 125.78, 115.12 (t, <sup>1</sup>*J*<sub>C-F</sub> = 272.5 Hz), 21.55. **<sup>19</sup>F NMR** (376 MHz, CDCl<sub>3</sub>): δ -78.61 (s, 2F). **HRMS (ESI)** *m/z* calcd [M + H]<sup>+</sup> = for C<sub>9</sub>H<sub>7</sub>F<sub>2</sub>N<sub>3</sub>O: 212.0635, found: 212.0628.

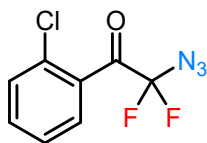

2i

### 2-Azido-1-(2-chlorophenyl)-2,2-difluoroethan-1-one (2i)

Colorless oil (83%), purified by silica-gel column chromatography (PE/EA).

**<sup>1</sup>H NMR** (400 MHz, CDCl<sub>3</sub>): δ 7.68 (d, *J* = 8.0 Hz, 1H), 7.50 (d, *J* = 8.0 Hz, 2H), 7.40-7.33 (m, 1H). **<sup>13</sup>C NMR** (100 MHz, CDCl<sub>3</sub>): δ 185.51 (t, <sup>2</sup>*J*<sub>C-F</sub> = 36.0 Hz), 134.57, 132.20, 131.52, 130.69, 129.08, 127.58, 114.28 (t, <sup>1</sup>*J*<sub>C-F</sub> = 272.0 Hz). **<sup>19</sup>F NMR** (376 MHz, CDCl<sub>3</sub>): δ -80.67 (s, 2H). **HRMS (ESI)** *m/z* calcd [M + Na]<sup>+</sup> = for C<sub>8</sub>H<sub>4</sub>ClF<sub>2</sub>N<sub>3</sub>O: 253.9909, found: 253.9907.

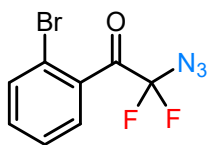

2j

### 2-Azido-1-(2-bromophenyl)-2,2-difluoroethan-1-one (2j)

Colorless oil (90%), purified by silica-gel column chromatography (PE/EA).

**<sup>1</sup>H NMR** (400 MHz, CDCl<sub>3</sub>): δ 7.72-7.69 (m, 1H), 7.65-7.62 (m, 1H), 7.45-7.39 (m, 2H). **<sup>13</sup>C NMR** (100 MHz, CDCl<sub>3</sub>): δ 186.15 (t, <sup>2</sup>*J*<sub>C-F</sub> = 38.5 Hz), 134.57, 133.58, 134.42, 129.71 (t, <sup>3</sup>*J*<sub>C-F</sub> = 3.0 Hz), 127.23, 121.19, 114.09 (t, <sup>1</sup>*J*<sub>C-F</sub> = 271.5 Hz). **<sup>19</sup>F NMR** (376 MHz, CDCl<sub>3</sub>): δ -80.58 (s, 2F). **HRMS**

(ESI)  $m/z$  calcd  $[M + Na]^+$  = for  $C_8H_4BrF_2N_3O$ : 297.9404, found: 297.9410.

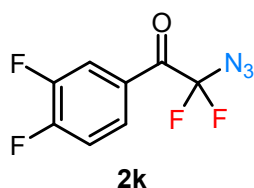

### 2-Azido-1-(3,4-difluorophenyl)-2,2-difluoroethan-1-one (2k)

Colorless oil (97%), purified by silica-gel column chromatography (PE/EA).

$^1H$  NMR (400 MHz,  $CDCl_3$ ):  $\delta$  8.15-7.99 (m, 2H), 7.54-7.27 (m, 1H).  $^{13}C$  NMR (100 MHz,  $CDCl_3$ ):  $\delta$  180.13 (t,  $^2J_{C-F}$  = 23.5 Hz), 156.13 (d,  $^1J_{C-F}$  = 256.0 Hz), 151.60 (d,  $^1J_{C-F}$  = 250.0 Hz), 128.32, 125.23, 120.38 (d,  $^2J_{C-F}$  = 18.0 Hz), 118.15 (dd,  $^2J_{C-F}$  = 18.0, 11.0 Hz), 94.75 (t,  $^2J_{C-F}$  = 325.5 Hz).  $^{19}F$  NMR (376 MHz,  $CDCl_3$ ):  $\delta$  -54.63 (s, 2F), -124.86 (dd,  $J$  = 18.8, 7.5 Hz), -134.12 (dd,  $J$  = 18.8, 7.5 Hz). HRMS (ESI)  $m/z$  calcd  $[M + H]^+$  = for  $C_8H_3F_4N_3O$ : 234.0290, found: 234.0285.

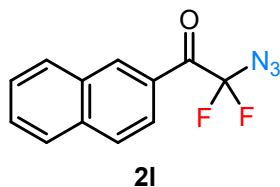

### 2-Azido-2,2-difluoro-1-(naphthalen-2-yl)ethan-1-one (2l)

Colorless oil (95%), purified by silica-gel column chromatography (PE/EA).

$^1H$  NMR (400 MHz,  $CDCl_3$ ):  $\delta$  8.65 (s, 1H), 8.07 (d,  $J$  = 8.0 Hz, 1H), 7.98 (d,  $J$  = 8.0 Hz, 1H), 7.91 (d,  $J$  = 8.0 Hz, 1H), 7.88 (d,  $J$  = 8.0 Hz, 1H), 7.66 (t,  $J$  = 6.0 Hz, 1H), 7.58 (t,  $J$  = 8.0 Hz, 1H).  $^{13}C$  NMR (100 MHz,  $CDCl_3$ ):  $\delta$  183.24 (t,  $^2J_{C-F}$  = 34.0 Hz), 136.40, 133.48 (t,  $^3J_{C-F}$  = 3.5 Hz), 132.23, 130.24, 129.93, 128.91, 127.92, 127.58, 127.34, 124.65, 115.78 (t,  $^1J_{C-F}$  = 271.5 Hz).  $^{19}F$  NMR (376 MHz,  $CDCl_3$ ):  $\delta$  -77.25 (s, 2F).

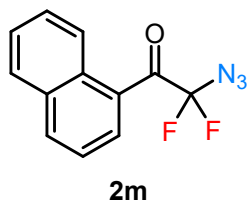

### 2-Azido-2,2-difluoro-1-(naphthalen-1-yl)ethan-1-one (2m)

Colorless oil (92%), purified by silica-gel column chromatography (PE/EA).

$^1H$  NMR (400 MHz,  $CDCl_3$ ):  $\delta$  8.72 (d,  $J$  = 8.0 Hz, 1H), 8.23 (d,  $J$  = 8.0 Hz, 1H), 8.08 (d,  $J$  = 8.0 Hz, 1H), 7.90 (d,  $J$  = 8.0 Hz, 1H), 7.67 (t,  $J$  = 6.0 Hz, 1H), 7.59 (t,  $J$  = 8.0 Hz, 1H), 7.51 (t,  $J$  = 6.0 Hz, 1H).  $^{13}C$  NMR (100 MHz,  $CDCl_3$ ):  $\delta$  185.97 (t,  $^2J_{C-F}$  = 33.0 Hz), 135.57, 134.00, 131.29 (t,  $^3J_{C-F}$  = 4.5 Hz), 131.20, 129.20, 129.02, 127.31, 127.05, 125.20, 124.13, 115.37 (t,  $^1J_{C-F}$  = 273.0 Hz).  $^{19}F$  NMR (376 MHz,  $CDCl_3$ ):  $\delta$  -77.55 (s, 2F). HRMS (ESI)  $m/z$  calcd  $[M + Na]^+$  = for  $C_{12}H_7F_2N_3O$ : 270.0455, found: 270.0454.



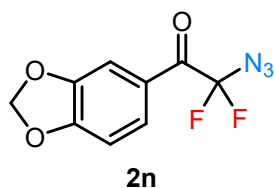

**2-Azido-1-(benzo[d][1,3]dioxol-5-yl)-2,2-difluoroethan-1-one (2n)**

Colorless oil (77%), purified by silica-gel column chromatography (PE/EA).

**<sup>1</sup>H NMR** (400 MHz, CDCl<sub>3</sub>): δ 7.72 (d, *J* = 8.0 Hz, 1H), 7.46 (s, 1H), 6.89 (d, *J* = 8.0 Hz, 1H), 6.08 (s, 2H). **<sup>13</sup>C NMR** (100 MHz, CDCl<sub>3</sub>): δ 181.26 (t, <sup>2</sup>*J*<sub>C-F</sub> = 33.5 Hz), 153.78, 148.42, 127.91 (t, <sup>3</sup>*J*<sub>C-F</sub> = 3.5 Hz), 124.59, 115.68 (t, <sup>1</sup>*J*<sub>C-F</sub> = 271.0 Hz), 109.57, 108.38, 102.47. **<sup>19</sup>F NMR** (376 MHz, CDCl<sub>3</sub>): δ -77.27 (s, 2F). **HRMS (ESI)** *m/z* calcd [M + H]<sup>+</sup> = for C<sub>9</sub>H<sub>5</sub>F<sub>2</sub>N<sub>3</sub>O<sub>3</sub>: 242.0377, found: 242.0372.

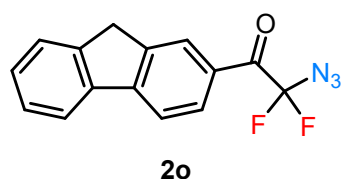

**2-Azido-1-(9H-fluoren-2-yl)-2,2-difluoroethan-1-one (2o)**

Colorless oil (82%), purified by silica-gel column chromatography (PE/EA).

**<sup>1</sup>H NMR** (400 MHz, CDCl<sub>3</sub>): δ 8.22 (s, 1H), 8.13 (d, *J* = 8.0 Hz, 1H), 7.84-7.80 (m, 2H), 7.59-7.57 (m, 1H), 7.43-7.41 (m, 2H), 3.90 (s, 2H). **<sup>13</sup>C NMR** (100 MHz, CDCl<sub>3</sub>): δ 182.96 (t, <sup>2</sup>*J*<sub>C-F</sub> = 33.5 Hz), 148.62, 144.96, 143.46, 139.95, 129.99 (t, <sup>3</sup>*J*<sub>C-F</sub> = 3.0 Hz), 128.90, 128.44, 127.33, 127.02 (t, <sup>4</sup>*J*<sub>C-F</sub> = 2.5 Hz), 125.40, 121.40, 120.01, 115.85 (t, <sup>1</sup>*J*<sub>C-F</sub> = 271.5 Hz), 36.89. **<sup>19</sup>F NMR** (376 MHz, CDCl<sub>3</sub>): δ -77.35 (s, 2F). **HRMS (ESI)** *m/z* calcd [M + Na]<sup>+</sup> = for C<sub>15</sub>H<sub>9</sub>F<sub>2</sub>N<sub>3</sub>O: 308.0611, found: 308.0609.

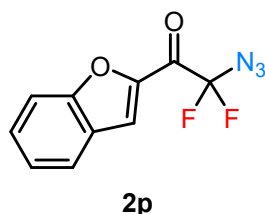

**2-Azido-1-(benzofuran-2-yl)-2,2-difluoroethan-1-one (2p)**

Colorless oil (63%), purified by silica-gel column chromatography (PE/EA).

**<sup>1</sup>H NMR** (400 MHz, CDCl<sub>3</sub>): δ 7.86 (s, 1H), 7.78 (d, *J* = 8.0 Hz, 1H), 7.65-7.55 (m, 2H), 7.40-7.35 (m, 1H). **<sup>13</sup>C NMR** (100 MHz, CDCl<sub>3</sub>): δ 173.57, 156.76, 146.57, 130.46, 126.54, 124.77, 124.25, 120.34, 114.82, 112.79. **<sup>19</sup>F NMR** (376 MHz, CDCl<sub>3</sub>): δ -79.87 (s, 2F). **HRMS (ESI)** *m/z* calcd [M + Na]<sup>+</sup> = for C<sub>10</sub>H<sub>5</sub>F<sub>2</sub>N<sub>3</sub>O<sub>2</sub>: 260.0242, found: 260.0249.

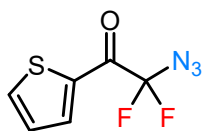

**2q**

**2-Azido-2,2-difluoro-1-(thiophen-2-yl)ethan-1-one (2q)**

Colorless oil (86%), purified by silica-gel column chromatography (PE/EA).

$^1\text{H NMR}$  (400 MHz,  $\text{CDCl}_3$ ):  $\delta$  8.00 (d,  $J = 4.0$  Hz, 1H), 7.88 (d,  $J = 4.0$  Hz, 1H), 7.22 (t,  $J = 6.0$  Hz, 1H).  $^{13}\text{C NMR}$  (100 MHz,  $\text{CDCl}_3$ ):  $\delta$  176.63 (t,  $^2J_{\text{C-F}} = 35.5$  Hz), 137.92, 136.88 (t,  $^3J_{\text{C-F}} = 4.0$  Hz), 136.36, 129.13, 115.14 (t,  $^1J_{\text{C-F}} = 270.0$  Hz).  $^{19}\text{F NMR}$  (376 MHz,  $\text{CDCl}_3$ ):  $\delta$  -78.89 (s, 2F). **HRMS (ESI)**  $m/z$  calcd  $[\text{M} + \text{Na}]^+$  = for  $\text{C}_6\text{H}_3\text{F}_2\text{N}_3\text{OS}$ : 225.9863, found: 225.9867.

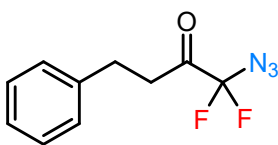

**2r**

**1-Azido-1,1-difluoro-4-phenylbutan-2-one (2r)**

Colorless oil (71%), purified by silica-gel column chromatography (PE/EA).

$^1\text{H NMR}$  (400 MHz,  $\text{CDCl}_3$ ):  $\delta$  7.30-7.27 (m, 2H), 7.22-7.16 (m, 3H), 3.15-2.92 (m, 4H).  $^{13}\text{C NMR}$  (100 MHz,  $\text{CDCl}_3$ ):  $\delta$  193.81 (t,  $^2J_{\text{C-F}} = 34.5$  Hz), 139.61, 128.79, 128.38, 126.69, 114.09 (t,  $^1J_{\text{C-F}} = 271.0$  Hz), 37.89, 28.60.  $^{19}\text{F NMR}$  (376 MHz,  $\text{CDCl}_3$ ):  $\delta$  -85.58 (s, 2F). **HRMS (ESI)**  $m/z$  calcd  $[\text{M} + \text{H}]^+$  = for  $\text{C}_{10}\text{H}_9\text{F}_2\text{N}_3\text{O}$ : 226.0792, found: 226.0792.

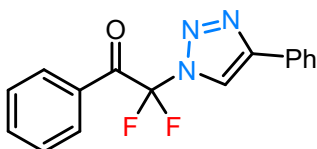

**4aa**

**2,2-Difluoro-1-phenyl-2-(4-phenyl-1H-1,2,3-triazol-1-yl)ethan-1-one (4aa)**

White solid (95%), m.p. = 97.2 °C, purified by silica-gel column chromatography (PE/EA).

$^1\text{H NMR}$  (400 MHz,  $\text{CDCl}_3$ ):  $\delta$  8.29 (s, 1H), 8.03 (d,  $J = 8.0$  Hz, 2H), 7.90 (d,  $J = 8.0$  Hz, 2H), 7.68 (t,  $J = 6.0$  Hz, 1H), 7.52-7.45 (m, 4H), 7.40 (t,  $J = 6.0$  Hz, 1H).  $^{13}\text{C NMR}$  (100 MHz,  $\text{CDCl}_3$ ):  $\delta$  181.76 (t,  $^2J_{\text{C-F}} = 29.5$  Hz), 148.71, 135.31, 130.95 (t,  $^3J_{\text{C-F}} = 3.0$  Hz), 130.37, 129.20, 129.07, 129.03, 128.95, 126.16, 117.20, 111.72 (t,  $^1J_{\text{C-F}} = 268.0$  Hz).  $^{19}\text{F NMR}$  (376 MHz,  $\text{CDCl}_3$ ):  $\delta$  -82.29 (s, 2F). **HRMS (ESI)**  $m/z$  calcd  $[\text{M} + \text{CH}_3\text{OH} + \text{H}]^+$  = for  $\text{C}_{16}\text{H}_{11}\text{F}_2\text{N}_3\text{O}$ : 332.1205, found: 332.1208.

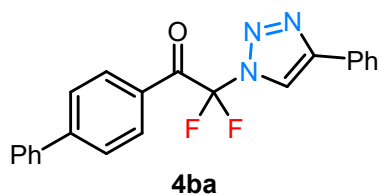

**1-([1,1'-Biphenyl]-4-yl)-2,2-difluoro-2-(4-phenyl-1H-1,2,3-triazol-1-yl)ethan-1-one (4ba)**

White solid (78%), m.p. = 140.6 °C, purified by silica-gel column chromatography (PE/EA).

<sup>1</sup>H NMR (500 MHz, CDCl<sub>3</sub>): δ 8.34 (s, 1H), 8.11 (d, *J* = 10 Hz, 2H), 7.92 (d, *J* = 5 Hz, 2H), 7.71 (d, *J* = 5 Hz, 2H), 7.63 (d, *J* = 10 Hz, 2H), 7.50-7.41 (m, 6H). <sup>13</sup>C NMR (125 MHz, CDCl<sub>3</sub>): δ 181.29 (t, <sup>2</sup>*J*<sub>C-F</sub> = 27.5 Hz), 148.75, 148.01, 139.14, 131.06, 129.55, 129.23, 129.15, 129.10, 128.98, 128.91, 127.59, 127.39, 126.18, 117.35, 111.81 (<sup>1</sup>*J*<sub>C-F</sub> = 267.5 Hz). <sup>19</sup>F NMR (376 MHz, CDCl<sub>3</sub>): δ -81.59 (s, 2F). HRMS (ESI) *m/z* calcd [M + Na]<sup>+</sup> = for C<sub>22</sub>H<sub>15</sub>F<sub>2</sub>N<sub>3</sub>O: 398.1081, found: 398.1082.

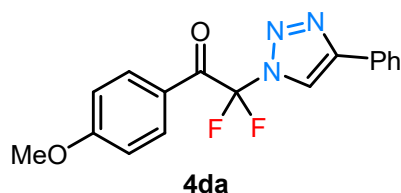

**2,2-Difluoro-1-(4-methoxyphenyl)-2-(4-phenyl-1H-1,2,3-triazol-1-yl)ethan-1-one (4da)**

White solid (54%), m.p. = 88.0 °C, purified by silica-gel column chromatography (PE/EA).

<sup>1</sup>H NMR (500 MHz, CDCl<sub>3</sub>): δ 8.28 (s, 1H), 8.01 (d, *J* = 10 Hz, 2H), 7.88 (d, *J* = 5.0 Hz, 2H), 7.44 (t, *J* = 10 Hz, 2H), 7.38 (t, *J* = 7.5 Hz, 1H), 6.94 (d, *J* = 5 Hz, 2H), 3.85 (s, 3H). <sup>13</sup>C NMR (125 MHz, CDCl<sub>3</sub>): δ 180.07 (t, <sup>2</sup>*J*<sub>C-F</sub> = 30.0 Hz), 165.33, 148.58, 133.08, 129.13, 129.05, 126.12, 125.86, 123.60, 117.42, 114.45, 111.98 (<sup>1</sup>*J*<sub>C-F</sub> = 270 Hz), 55.70. <sup>19</sup>F NMR (376 MHz, CDCl<sub>3</sub>): δ -81.25 (s, 2F). HRMS (ESI) *m/z* calcd [M + Na]<sup>+</sup> = for C<sub>17</sub>H<sub>13</sub>F<sub>2</sub>N<sub>3</sub>O<sub>2</sub>: 352.0874, found: 352.0865.

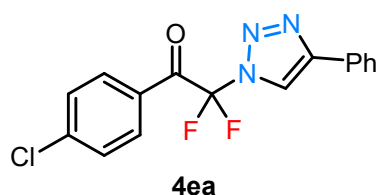

**1-(4-Chlorophenyl)-2,2-difluoro-2-(4-phenyl-1H-1,2,3-triazol-1-yl)ethan-1-one (4ea)**

White solid (64%), m.p. = 104.2 °C, purified by silica-gel column chromatography (PE/EA).

<sup>1</sup>H NMR (400 MHz, CDCl<sub>3</sub>) δ 8.32 (s, 1H), 7.95 (d, *J* = 8.0 Hz, 2H), 7.87 (d, *J* = 4.0 Hz, 2H), 7.46-7.42 (m, 4H), 7.40-7.37(m, 1H). <sup>13</sup>C NMR (100 MHz, CDCl<sub>3</sub>): δ 180.80 (t, <sup>2</sup>*J*<sub>C-F</sub> = 29.5 Hz), 148.86, 142.25, 131.78, 131.75, 129.52, 129.33, 129.13, 128.83, 126.19, 117.36, 111.61 (t, <sup>1</sup>*J*<sub>C-F</sub> = 268.0 Hz). <sup>19</sup>F NMR (376 MHz, CDCl<sub>3</sub>) δ -82.20 (s, 2F). HRMS (ESI) *m/z* calcd [M + Na]<sup>+</sup> = for C<sub>16</sub>H<sub>10</sub>ClF<sub>2</sub>N<sub>3</sub>O: 356.0378, found: 356.0371.

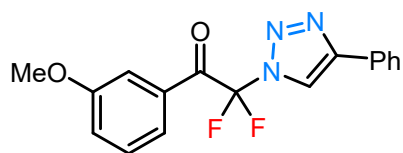

**4ga**

**2,2-Difluoro-1-(3-methoxyphenyl)-2-(4-phenyl-1H-1,2,3-triazol-1-yl)ethan-1-one (4ga)**

White solid (89%), m.p. = 95.2 °C, purified by silica-gel column chromatography (PE/EA).

<sup>1</sup>H NMR (400 MHz, CDCl<sub>3</sub>) δ 8.32 (s, 1H), 7.88 (d, *J* = 8.0 Hz, 2H), 7.55-7.51 (m, 2H), 7.46-7.33 (m, 4H), 7.19 (d, *J* = 8.0 Hz, 1H), 3.80 (s, 3H). <sup>13</sup>C NMR (101 MHz, CDCl<sub>3</sub>) δ 181.55 (t, <sup>2</sup>*J*<sub>C-F</sub> = 29.5 Hz), 159.92, 148.74, 131.99, 130.12, 129.26, 129.12, 128.93, 126.18, 122.93 (t, <sup>2</sup>*J*<sub>C-F</sub> = 3.5 Hz), 122.02, 117.37, 114.52, 111.72 (t, <sup>1</sup>*J*<sub>C-F</sub> = 267.5 Hz), 55.58. <sup>19</sup>F NMR (376 MHz, CDCl<sub>3</sub>) δ -82.04 (s, 2F). HRMS (ESI) *m/z* calcd [M + Na]<sup>+</sup> = for C<sub>17</sub>H<sub>13</sub>F<sub>2</sub>N<sub>3</sub>O<sub>2</sub>: 352.0874, found: 352.0874.

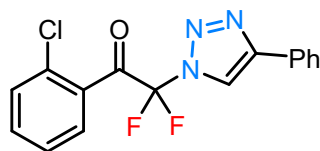

**4ia**

**1-(2-Chlorophenyl)-2,2-difluoro-2-(4-phenyl-1H-1,2,3-triazol-1-yl)ethan-1-one (4ia)**

White solid (51%), m.p. = 68.4 °C, purified by silica-gel column chromatography (PE/EA).

<sup>1</sup>H NMR (400 MHz, CDCl<sub>3</sub>) δ 8.27 (s, 1H) 7.89 (d, *J* = 8.0 Hz, 2H), 7.73 (d, *J* = 8.0 Hz, 1H), 7.54-7.44 (m, 4H), 7.41-7.34 (m, 2H). <sup>13</sup>C NMR (100 MHz, CDCl<sub>3</sub>) δ 184.26 (t, <sup>2</sup>*J*<sub>C-F</sub> = 32.0 Hz), 148.65, 133.82, 133.48, 131.80, 131.26, 130.27, 129.28, 129.14, 128.91, 126.89, 126.19, 117.72, 110.92 (t, <sup>1</sup>*J*<sub>C-F</sub> = 269.5). <sup>19</sup>F NMR (376 MHz, CDCl<sub>3</sub>) δ -84.77 (s, 2F). HRMS (ESI) *m/z* calcd [M + Na]<sup>+</sup> = for C<sub>16</sub>H<sub>10</sub>ClF<sub>2</sub>N<sub>3</sub>O: 356.0378, found: 356.0373.

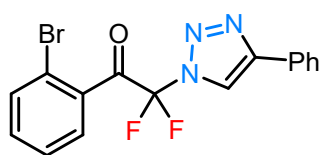

**4ja**

**1-(2-Bromophenyl)-2,2-difluoro-2-(4-phenyl-1H-1,2,3-triazol-1-yl)ethan-1-one (4ja)**

White solid (63%), m.p. = 78.6 °C, purified by silica-gel column chromatography (PE/EA).

<sup>1</sup>H NMR (400 MHz, CDCl<sub>3</sub>) δ 8.27 (s, 1H), 7.88 (d, *J* = 8.0 Hz, 2 H) 7.72-7.68 (m, 2H), 7.47-7.37 (m, 5H). <sup>13</sup>C NMR (100 MHz, CDCl<sub>3</sub>) δ 185.00, 148.65, 134.47, 133.79, 133.73, 130.17, 129.30, 129.15, 128.88, 127.42, 126.20, 121.24, 117.78, 110.76 (t, <sup>1</sup>*J*<sub>C-F</sub> = 269.5 Hz). <sup>19</sup>F NMR (376 MHz, CDCl<sub>3</sub>) δ -84.72 (s, 2F). HRMS (ESI) *m/z* calcd [M + Na]<sup>+</sup> = for C<sub>16</sub>H<sub>10</sub>BrF<sub>2</sub>N<sub>3</sub>O: 399.9873, found: 399.9869.

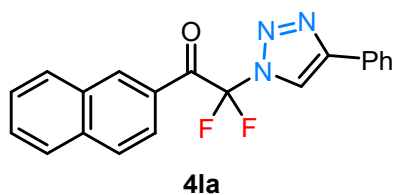

**2,2-Difluoro-1-(naphthalen-2-yl)-2-(4-phenyl-1H-1,2,3-triazol-1-yl)ethan-1-one (4la)**

White solid (87%), m.p. = 126.4 °C, purified by silica-gel column chromatography (PE/EA).

<sup>1</sup>H NMR (500 MHz, CDCl<sub>3</sub>): δ 8.60 (s, 1H), 8.34 (s, 1H), 8.02 (s, 1H), 7.95-7.85 (m, 5H), 7.64 (s, 1H), 7.57 (s, 1H), 7.47-7.39 (m, 3H). <sup>13</sup>C NMR (125 MHz, CDCl<sub>3</sub>): δ 181.78 (t, <sup>2</sup>J<sub>C-F</sub> = 30.0 Hz), 148.72, 136.38, 133.50, 132.18, 130.29, 130.06, 129.20, 129.08, 129.02, 128.98, 128.17, 127.88, 127.38, 126.17, 124.56, 117.42, 111.99 (t, <sup>1</sup>J<sub>C-F</sub> = 268.1 Hz). <sup>19</sup>F NMR (376 MHz, CDCl<sub>3</sub>): δ -81.03 (s, 2F). **HRMS (ESI)** m/z calcd [M + Na]<sup>+</sup> = for C<sub>20</sub>H<sub>13</sub>F<sub>2</sub>N<sub>3</sub>O: 372.0924, found: 372.0916.

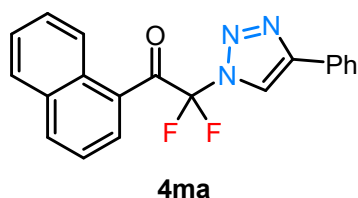

**2,2-Difluoro-1-(naphthalen-1-yl)-2-(4-phenyl-1H-1,2,3-triazol-1-yl)ethan-1-one (4ma)**

White solid (72%), m.p. = 99.4 °C, purified by silica-gel column chromatography (PE/EA).

<sup>1</sup>H NMR (500 MHz, CDCl<sub>3</sub>): δ 8.72 (d, *J* = 10.0 Hz, 1H), 8.33 (s, 1H), 8.12-8.08 (m, 2H), 7.91-7.89 (m, 3H), 7.69 (t, *J* = 7.5 Hz, 1H), 7.59 (t, *J* = 7.5 Hz, 1H), 7.51-7.38 (m, 4H). <sup>13</sup>C NMR (125 MHz, CDCl<sub>3</sub>): δ 184.16 (t, <sup>2</sup>J<sub>C-F</sub> = 29.4 Hz), 148.57, 135.67, 133.96, 131.16, 129.33, 129.16, 129.15, 129.07, 129.03, 128.97, 127.78, 127.15, 126.15, 125.23, 124.12, 117.74, 111.76 (t, <sup>1</sup>J<sub>C-F</sub> = 270.0 Hz). <sup>19</sup>F NMR (376 MHz, CDCl<sub>3</sub>): δ -80.99 (s, 2F). **HRMS (ESI)** m/z calcd [M + Na]<sup>+</sup> = for C<sub>20</sub>H<sub>13</sub>F<sub>2</sub>N<sub>3</sub>O: 372.0924, found: 372.0923.

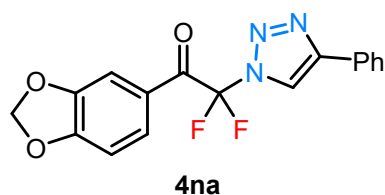

**1-(Benzo[*d*][1,3]dioxol-5-yl)-2,2-difluoro-2-(4-phenyl-1H-1,2,3-triazol-1-yl)ethan-1-one (4na)**

White solid (43%), m.p. = 86.1 °C, purified by silica-gel column chromatography (PE/EA).

<sup>1</sup>H NMR (400 MHz, CDCl<sub>3</sub>) δ 8.27 (s, 1H), 7.88 (d, *J* = 8.0 Hz, 2H), 7.65 (d, *J* = 8.0 Hz, 1H), 7.49-7.43 (m, 3H), 7.40-7.37 (m, 1H), 6.86 (d, *J* = 8.0 Hz, 1H), 6.06 (s, 2H). <sup>13</sup>C NMR (100 MHz, CDCl<sub>3</sub>) δ 179.77 (t, <sup>2</sup>J<sub>C-F</sub> = 29.0 Hz), 153.95, 148.67, 148.55, 129.22, 129.11, 128.99, 128.03 (t, <sup>3</sup>J<sub>C-F</sub> = 3.5 Hz), 126.17, 125.25, 117.41, 111.91 (t, <sup>1</sup>J<sub>C-F</sub> = 269.5 Hz), 109.66, 108.59, 102.54. <sup>19</sup>F NMR (376 MHz, CDCl<sub>3</sub>) δ -81.59 (s, 2F). **HRMS (ESI)** m/z calcd [M + Na]<sup>+</sup> = for C<sub>17</sub>H<sub>11</sub>F<sub>2</sub>N<sub>3</sub>O<sub>3</sub>: 366.0666, found: 366.0663.

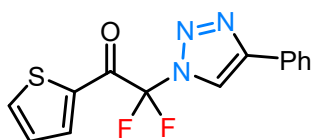

**4qa**

**2,2-Difluoro-2-(4-phenyl-1*H*-1,2,3-triazol-1-yl)-1-(thiophen-2-yl)ethan-1-one (4qa)**

White solid (62%), m.p. = 145.2 °C, purified by silica-gel column chromatography (PE/EA).

<sup>1</sup>H NMR (500 MHz, CDCl<sub>3</sub>): δ 8.28 (s, 1H), 7.95 (s, 1H), 7.88-7.86 (m, 3H), 7.44 (dt, *J* = 30.0, 10.0 Hz, 3H), 7.19 (t, *J* = 5.0 Hz, 1H). <sup>13</sup>C NMR (125 MHz, CDCl<sub>3</sub>): δ 174.91 (t, <sup>2</sup>*J*<sub>C-F</sub> = 32.5 Hz), 148.57, 138.37, 137.05, 136.75, 129.32, 129.18, 129.06, 128.94, 126.14, 117.55, 111.54 (t, <sup>1</sup>*J*<sub>C-F</sub> = 267.5 Hz).

<sup>19</sup>F NMR (376 MHz, CDCl<sub>3</sub>): δ -82.81 (s, 2F). HRMS (ESI) *m/z* calcd [M + Na]<sup>+</sup> = for C<sub>14</sub>H<sub>9</sub>F<sub>2</sub>N<sub>3</sub>OS: 328.0332, found: 328.0329.

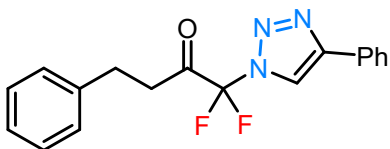

**4ra**

**1,1-Difluoro-4-phenyl-1-(4-phenyl-1*H*-1,2,3-triazol-1-yl)butan-2-one (4ra)**

White solid (45%), m.p. = 70.6 °C, purified by silica-gel column chromatography (PE/EA).

<sup>1</sup>H NMR (500 MHz, CDCl<sub>3</sub>): δ 8.13-8.11 (m, 2H), 7.85 (d, *J* = 10 Hz, 1H), 7.60 (t, *J* = 10 Hz, 1H), 7.46 (q, *J* = 10 Hz, 3H), 7.40-7.37 (m, 1H), 7.29 (t, *J* = 10 Hz, 1H), 7.24-7.19 (m, 2H), 3.28 (t, *J* = 10 Hz, 2H), 3.06 (t, *J* = 10 Hz, 2H). <sup>13</sup>C NMR (125 MHz, CDCl<sub>3</sub>): δ 192.04 (t, <sup>2</sup>*J*<sub>C-F</sub> = 30.0 Hz), 172.09, 148.60, 139.43, 133.82, 130.24, 129.42, 129.26, 129.10, 128.73, 128.53, 128.38, 126.65, 126.17, 117.36, 110.52 (<sup>1</sup>*J*<sub>C-F</sub> = 267.5 Hz), 39.42, 28.73. <sup>19</sup>F NMR (376 MHz, CDCl<sub>3</sub>): δ -95.99 (s, 2F).

HRMS (ESI) *m/z* calcd [M + Na]<sup>+</sup> = for C<sub>18</sub>H<sub>15</sub>F<sub>2</sub>N<sub>3</sub>O: 350.1081, found: 350.1080.

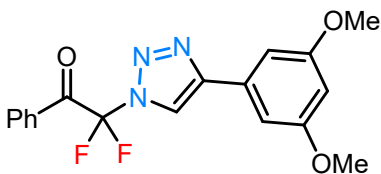

**4ab**

**2-(4-(3,5-Dimethoxyphenyl)-1*H*-1,2,3-triazol-1-yl)-2,2-difluoro-1-phenylethan-1-one (4ab)**

White solid (60%), m.p. = 75.4 °C, purified by silica-gel column chromatography (PE/EA).

<sup>1</sup>H NMR (400 MHz, CDCl<sub>3</sub>) δ 8.30 (s, 1H), 7.98 (d, *J* = 8.0 Hz, 2H), 7.62 (t, *J* = 8.0 Hz, 1H), 7.45 (t, *J* = 8.0 Hz, 2H), 7.02 (s, 2H), 6.47 (s, 1H), 3.79 (s, 6H). <sup>13</sup>C NMR (100 MHz, CDCl<sub>3</sub>) δ 181.72 (t, <sup>2</sup>*J*<sub>C-F</sub> = 29.0 Hz), 161.35, 148.62, 135.40, 130.86, 130.69, 130.35, 129.07, 117.75, 111.75 (t, <sup>1</sup>*J*<sub>C-F</sub> = 268.0 Hz), 104.15, 101.48, 55.49. <sup>19</sup>F NMR (376 MHz, CDCl<sub>3</sub>) δ -82.30 (s, 2F). HRMS (ESI) *m/z* calcd [M + H]<sup>+</sup> = for C<sub>18</sub>H<sub>15</sub>F<sub>2</sub>N<sub>3</sub>O<sub>3</sub>: 360.1160, found: 360.1157.

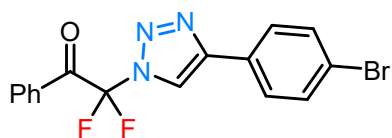

**4ac**

**2-(4-(4-Bromophenyl)-1H-1,2,3-triazol-1-yl)-2,2-difluoro-1-phenylethan-1-one (4ac)**

White solid (64%) , m.p. = 152.2 °C, purified by silica-gel column chromatography (PE/EA).

<sup>1</sup>H NMR (400 MHz, CDCl<sub>3</sub>) δ 8.28 (s, 1H), 8.04 (d, *J* = 8.0 Hz, 2H), 7.77 (d, *J* = 8.0 Hz, 2H), 7.69 (t, *J* = 8.0 Hz, 1H), 7.61 (d, *J* = 8.0 Hz, 2H), 7.52 (t, *J* = 8.0 Hz, 2H). <sup>13</sup>C NMR (100 MHz, CDCl<sub>3</sub>) δ 181.75 (t, <sup>2</sup>*J*<sub>C-F</sub> = 29.5 Hz), 147.71, 135.45, 132.32, 130.90, 130.46, 129.11, 127.97, 127.69, 123.32, 117.45, 111.80 (t, <sup>1</sup>*J*<sub>C-F</sub> = 268.5 Hz). <sup>19</sup>F NMR (376 MHz, CDCl<sub>3</sub>) δ -82.32 (s, 2F). HRMS (ESI) *m/z* calcd [M + Na]<sup>+</sup> = for C<sub>16</sub>H<sub>10</sub>BrF<sub>2</sub>N<sub>3</sub>O: 399.9873, found: 399.9876.

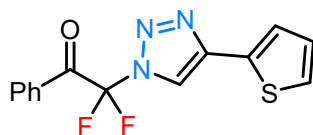

**4ad**

**2,2-Difluoro-1-phenyl-2-(4-(thiophen-2-yl)-1H-1,2,3-triazol-1-yl)ethan-1-one (4ad)**

White solid (48%) , m.p. = 101.8 °C, purified by silica-gel column chromatography (PE/EA).

<sup>1</sup>H NMR (400 MHz, CDCl<sub>3</sub>) δ 8.20 (s, 1H), 8.01 (d, *J* = 4.0 Hz, 2H), 7.81 (s, 1H), 7.66 (t, *J* = 6.0 Hz, 1H), 7.51-7.43 (m, 4H). <sup>13</sup>C NMR (100 MHz, CDCl<sub>3</sub>) δ 181.74 (t, <sup>2</sup>*J*<sub>C-F</sub> = 29.0 Hz), 144.87, 135.41, 130.91, 130.44, 130.12, 129.09, 127.00, 125.78, 122.91, 116.98, 111.72 (t, <sup>1</sup>*J*<sub>C-F</sub> = 268.0 Hz). <sup>19</sup>F NMR (376 MHz, CDCl<sub>3</sub>) δ -82.26 (s, 2F). HRMS (ESI) *m/z* calcd [M + Na]<sup>+</sup> = for C<sub>14</sub>H<sub>9</sub>F<sub>2</sub>N<sub>3</sub>OS: 328.0327, found: 328.0329.

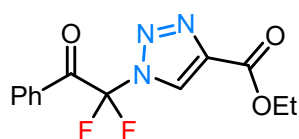

**4ae**

**Ethyl 1-(1,1-difluoro-2-oxo-2-phenylethyl)-1H-1,2,3-triazole-4-carboxylate (4ae)**

Yellow oil (59%), purified by silica-gel column chromatography (PE/EA).

<sup>1</sup>H NMR (400 MHz, CDCl<sub>3</sub>) δ 8.59 (s, 1H), 7.97 (d, *J* = 8.0 Hz, 2H), 7.66 (t, *J* = 6.0 Hz, 1H), 7.47 (t, *J* = 8.0 Hz, 2H), 4.41 (q, *J* = 6.7 Hz, 2H), 1.36 (t, *J* = 6.0 Hz, 3H). <sup>13</sup>C NMR (100 MHz, CDCl<sub>3</sub>) δ 181.26 (t, <sup>2</sup>*J*<sub>C-F</sub> = 30.0 Hz), 159.65, 140.90, 135.73, 130.34 (t, <sup>3</sup>*J*<sub>C-F</sub> = 2.5 Hz), 129.20, 128.07, 126.21, 111.98 (t, <sup>1</sup>*J*<sub>C-F</sub> = 272.0 Hz), 61.93, 14.22. <sup>19</sup>F NMR (376 MHz, CDCl<sub>3</sub>) δ -82.74 (s, 2F). HRMS (ESI) *m/z* calcd [M + H]<sup>+</sup> = for C<sub>13</sub>H<sub>11</sub>F<sub>2</sub>N<sub>3</sub>O<sub>3</sub>: 296.0847, found: 296.0843.

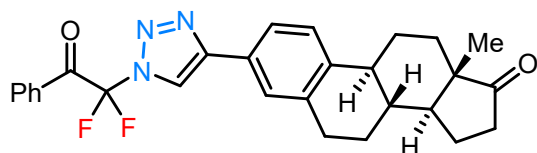

4af

**4-(1-(1,1-Difluoro-2-oxo-2-phenylethyl)-1H-1,2,3-triazol-4-yl)-13-methyl-6,7,8,9,11,12,13,14,15,16-decahydro-17H-cyclopenta[a]phenanthren-17-one (4af)**

White solid (70%) , m.p. = 144.5 °C, purified by silica-gel column chromatography (PE/EA).

<sup>1</sup>H NMR (400 MHz, CDCl<sub>3</sub>) δ 8.27 (s, 1H), 8.01 (d, *J* = 8.0 Hz, 2H), 7.69-7.62 (m, 3H), 7.49 (t, *J* = 8.0 Hz, 2H), 7.39 (d, *J* = 8.0 Hz, 1H), 2.99-2.96 (m, 2H), 2.55-2.43 (m, 2H), 2.36-2.31 (m, 1H), 2.20-1.96 (m, 4H), 1.68-1.45 (m, 6H), 0.93 (s, 3H). <sup>13</sup>C NMR (100 MHz, CDCl<sub>3</sub>) δ 220.92, 181.81 (t, <sup>2</sup>*J*<sub>C-F</sub> = 29.0 Hz), 148.76, 141.09, 137.42, 135.38, 130.97, 130.45, 129.07, 126.72, 126.44, 126.14, 123.56, 117.03, 111.74 (t, <sup>1</sup>*J*<sub>C-F</sub> = 267.5 Hz), 50.55, 48.04, 44.51, 38.08, 35.92, 31.62, 29.42, 26.45, 25.75, 21.66, 13.92. <sup>19</sup>F NMR (376 MHz, CDCl<sub>3</sub>) δ -82.24 (s, 2F). HRMS (ESI) *m/z* calcd [M + CH<sub>3</sub>OH + H]<sup>+</sup> = for C<sub>28</sub>H<sub>27</sub>F<sub>2</sub>N<sub>3</sub>O<sub>2</sub>: 508.2406, found: 508.2404.

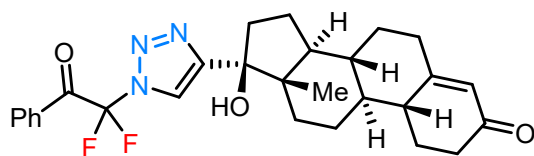

4ag

**17-(1-(1,1-Difluoro-2-oxo-2-phenylethyl)-1H-1,2,3-triazol-4-yl)-17-hydroxy-13-methyl-1,2,6,7,8,9,10,11,12,13,14,15,16,17-tetradecahydro-3H-cyclopenta[a]phenanthren-3-one (4ag)**

White solid (41%) , m.p. = 95.3 °C, purified by silica-gel column chromatography (PE/EA).

<sup>1</sup>H NMR (400 MHz, CDCl<sub>3</sub>) δ 7.98 (d, *J* = 12.0 Hz, 3H), 7.64 (t, *J* = 8.0 Hz, 1H), 7.46 (t, *J* = 8.0 Hz, 2H), 5.77 (s, 1H), 3.71-3.49 (m, 1H), 2.46-2.30 (m, 3H), 2.28-2.15 (m, 3H), 2.12-2.01 (m, 2H), 1.90-1.82 (m, 2H), 1.73-1.69 (m, 1H), 1.54-1.35 (m, 5H), 1.24-1.18 (m, 1H), 1.06 (s, 3H), 0.89 (t, *J* = 6.0 Hz, 1H), 0.65 (qd, *J* = 10.6, 4.0 Hz, 1H), 0.45 (td, *J* = 16.0, 4.0 Hz, 1H). <sup>13</sup>C NMR (100 MHz, CDCl<sub>3</sub>) δ 200.17, 181.91 (t, <sup>2</sup>*J*<sub>C-F</sub> = 30.0 Hz), 166.94, 154.94, 135.34, 130.95, 130.40, 129.02, 124.54, 119.54, 111.78 (t, <sup>1</sup>*J*<sub>C-F</sub> = 268.0 Hz), 82.38, 48.80, 48.21, 47.31, 42.52, 41.11, 38.06, 36.46, 35.51, 32.63, 30.67, 26.49, 26.07, 23.69, 14.26. <sup>19</sup>F NMR (376 MHz, CDCl<sub>3</sub>) δ -82.35 (s, 2F). HRMS (ESI) *m/z* calcd [M + Na]<sup>+</sup> = for C<sub>28</sub>H<sub>31</sub>F<sub>2</sub>N<sub>3</sub>O<sub>3</sub>: 518.2231, found: 518.2229.



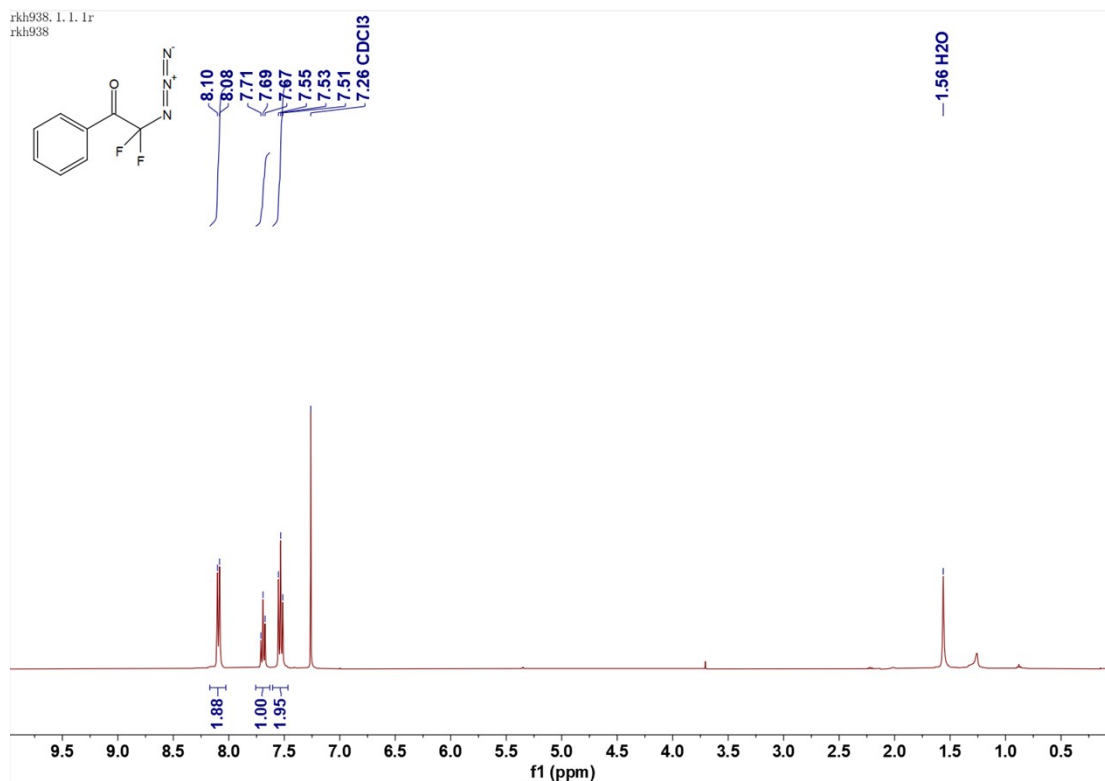

**<sup>1</sup>H NMR spectra of 2a**

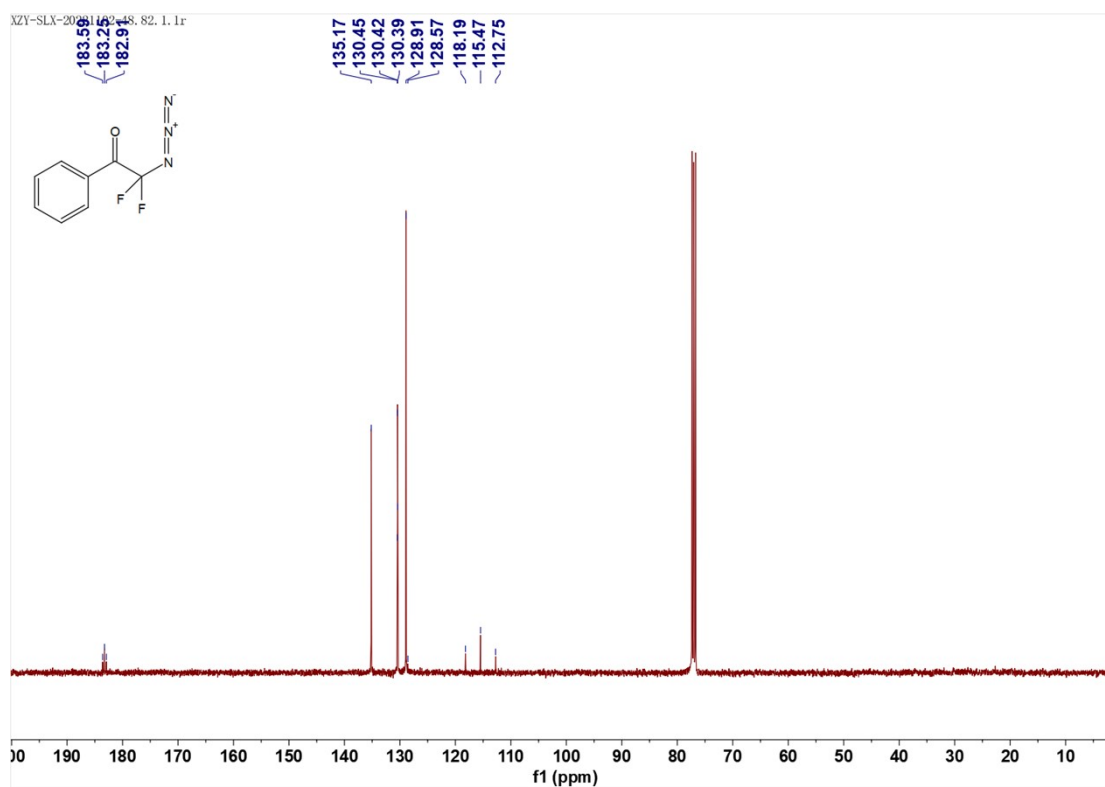

**<sup>13</sup>C NMR spectra of 2a**

XZY-SLX-20221102-48.83.1.f

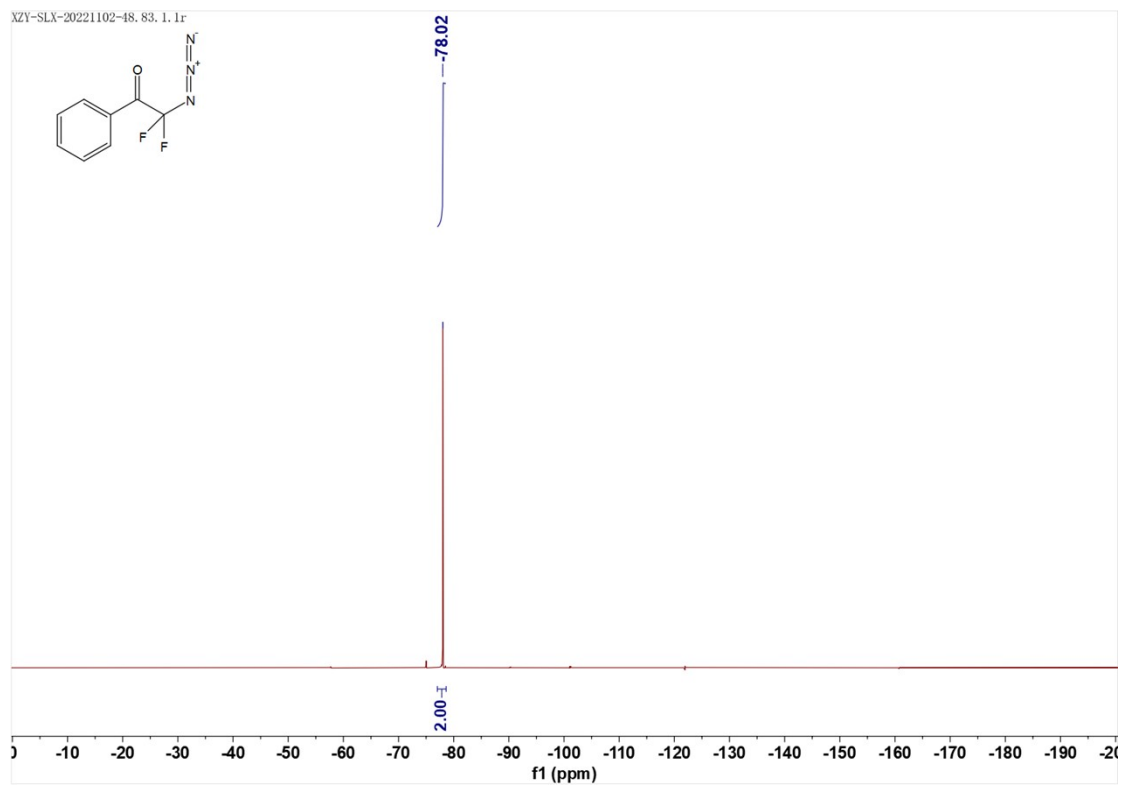

<sup>19</sup>F NMR spectra of 2a

23.1.fid

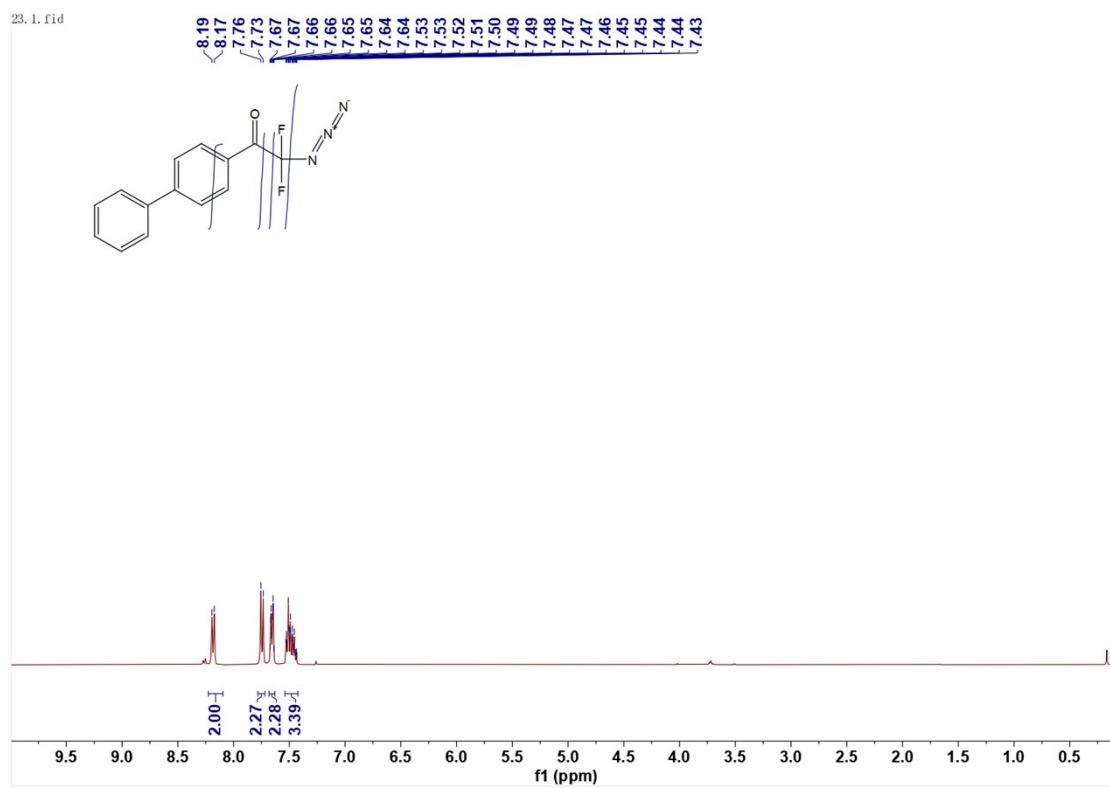

<sup>1</sup>H NMR spectra of 2b

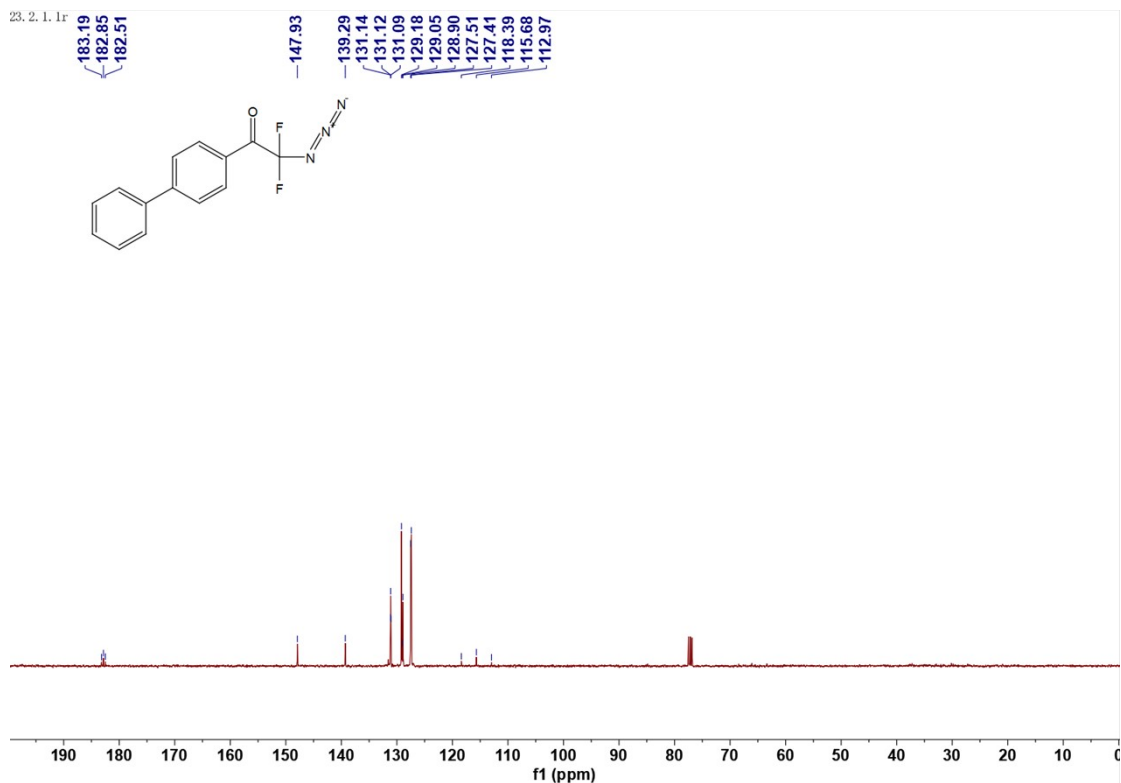

**<sup>13</sup>C NMR spectra of 2b**

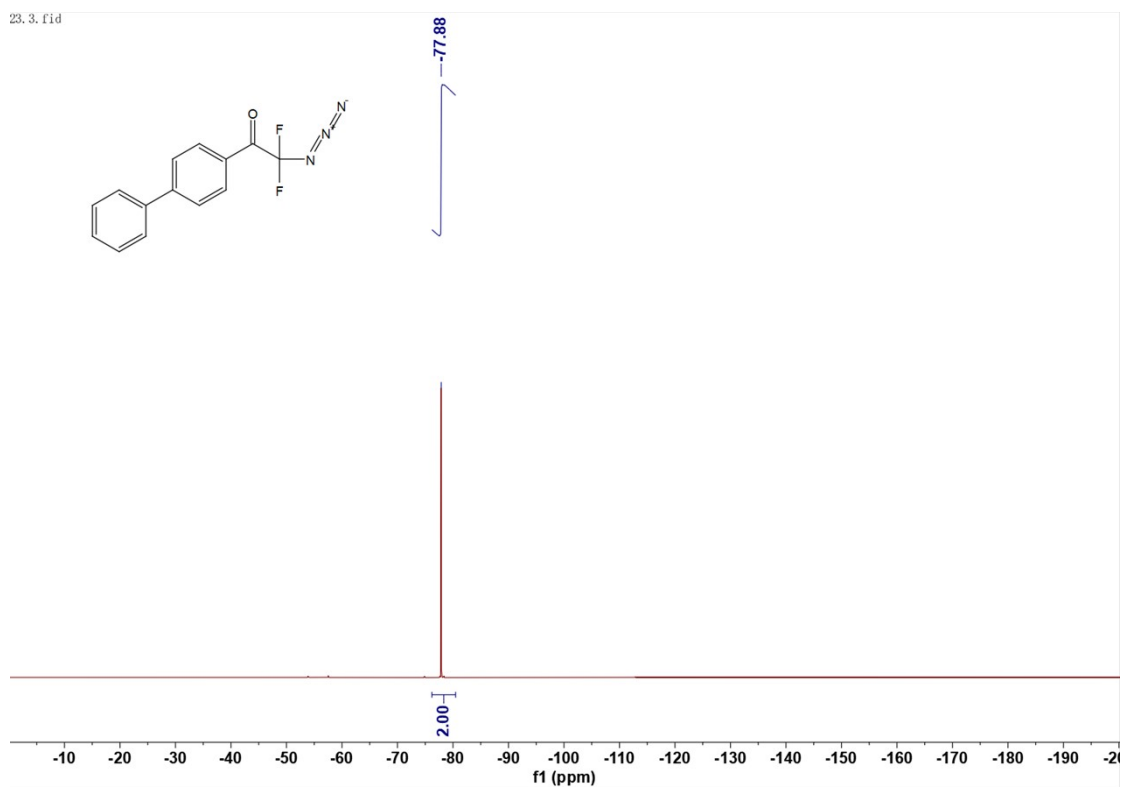

**<sup>19</sup>F NMR spectra of 2b**

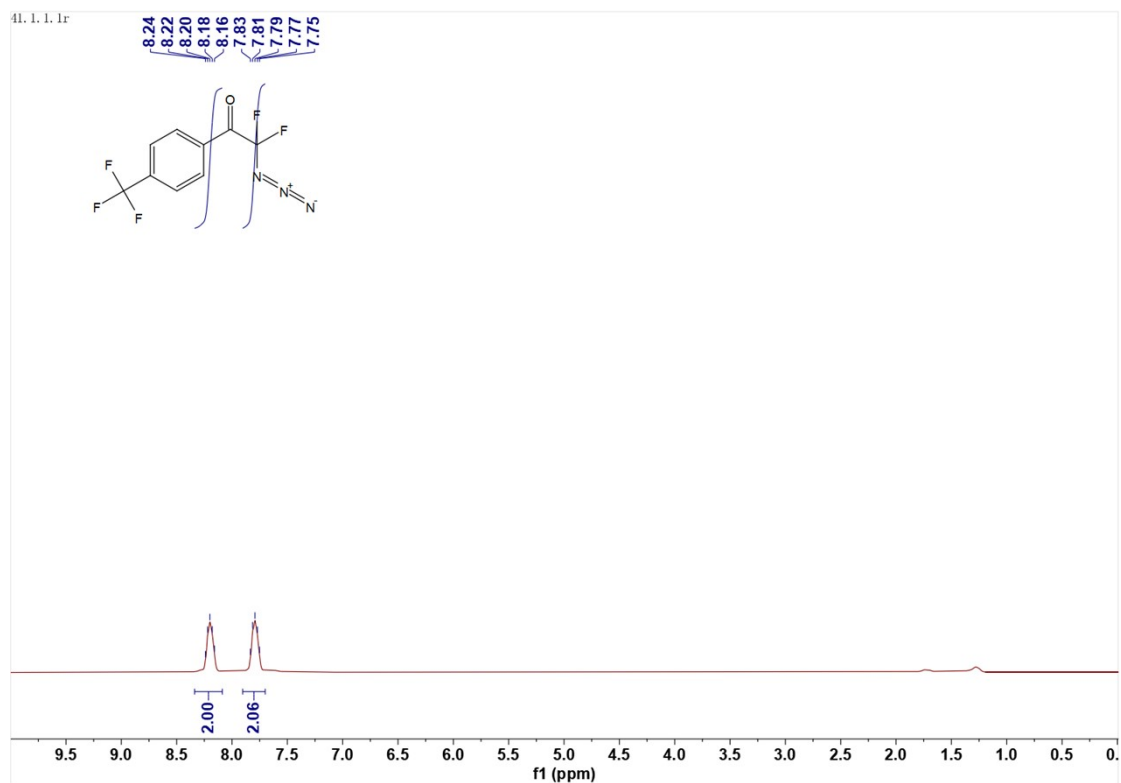

**<sup>1</sup>H NMR spectra of 2c**

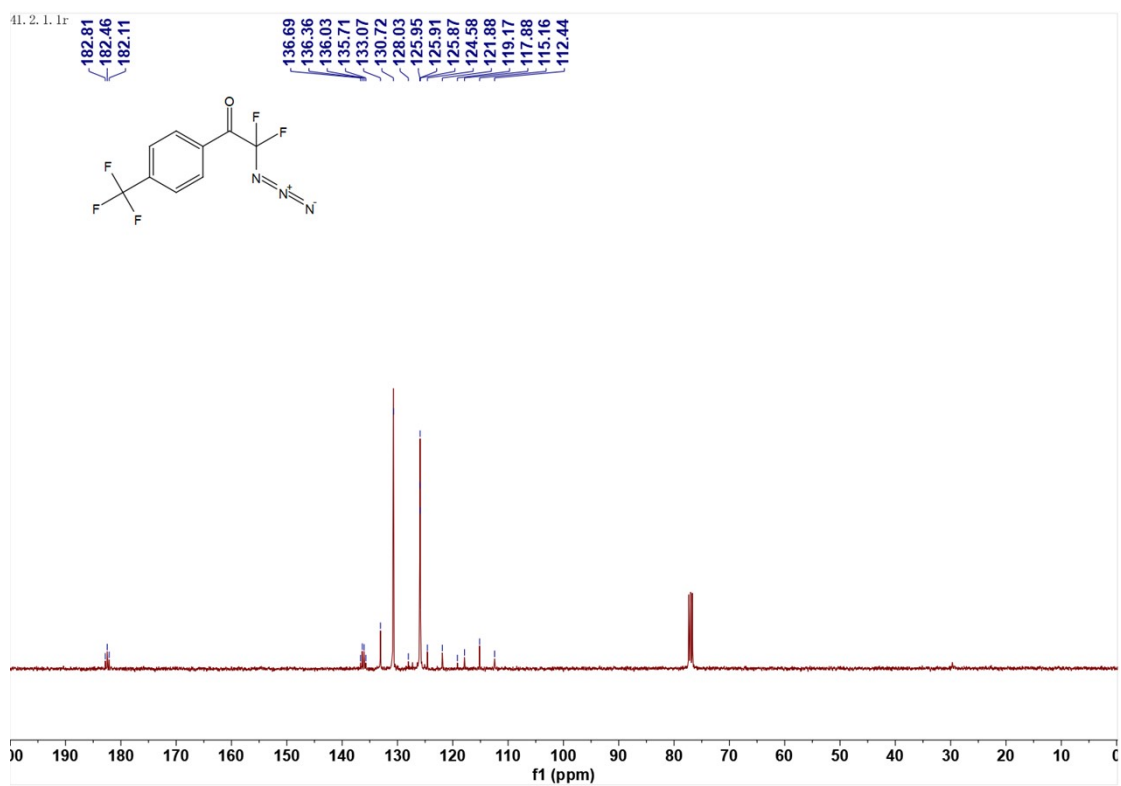

**<sup>13</sup>C NMR spectra of 2c**

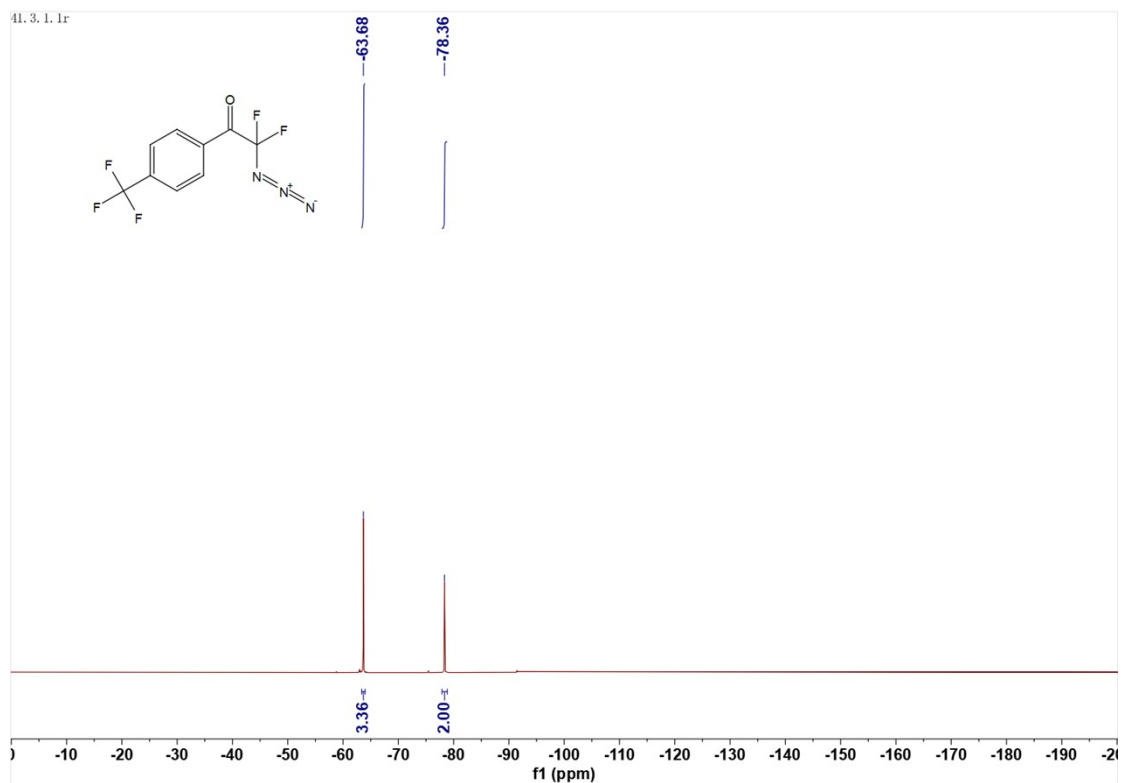

**<sup>19</sup>F NMR spectra of 2c**

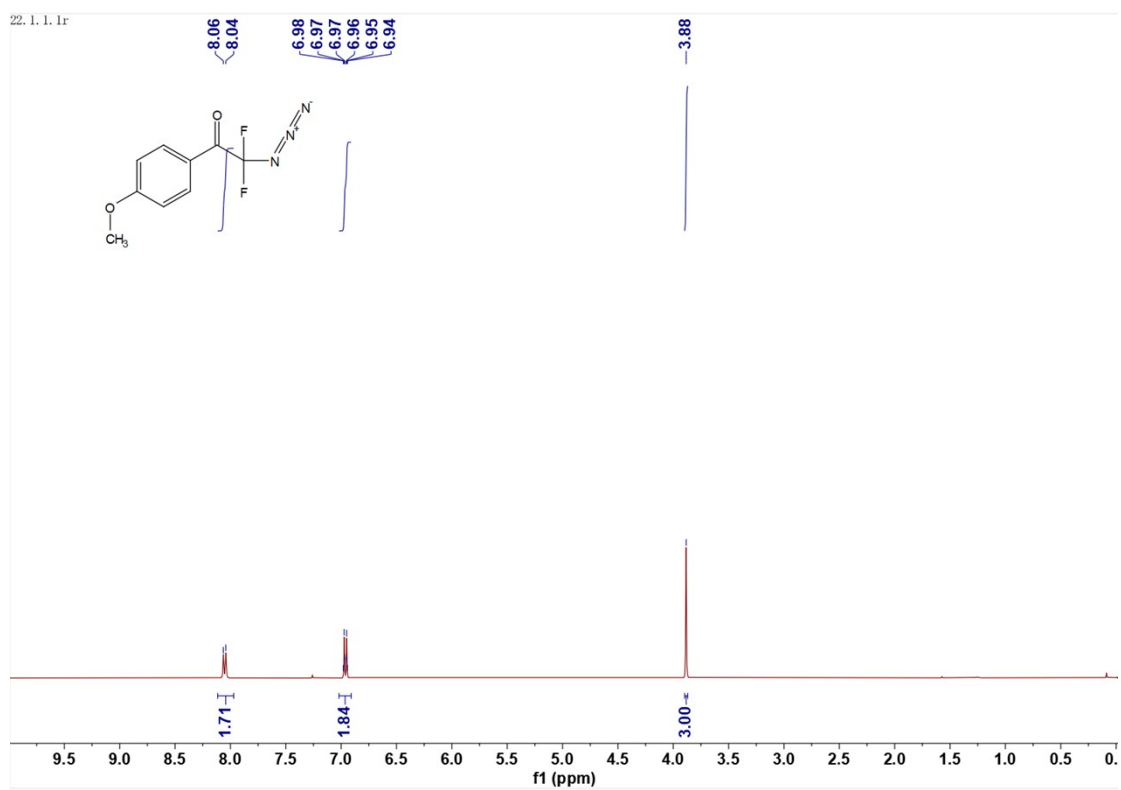

**<sup>1</sup>H NMR spectra of 2d**

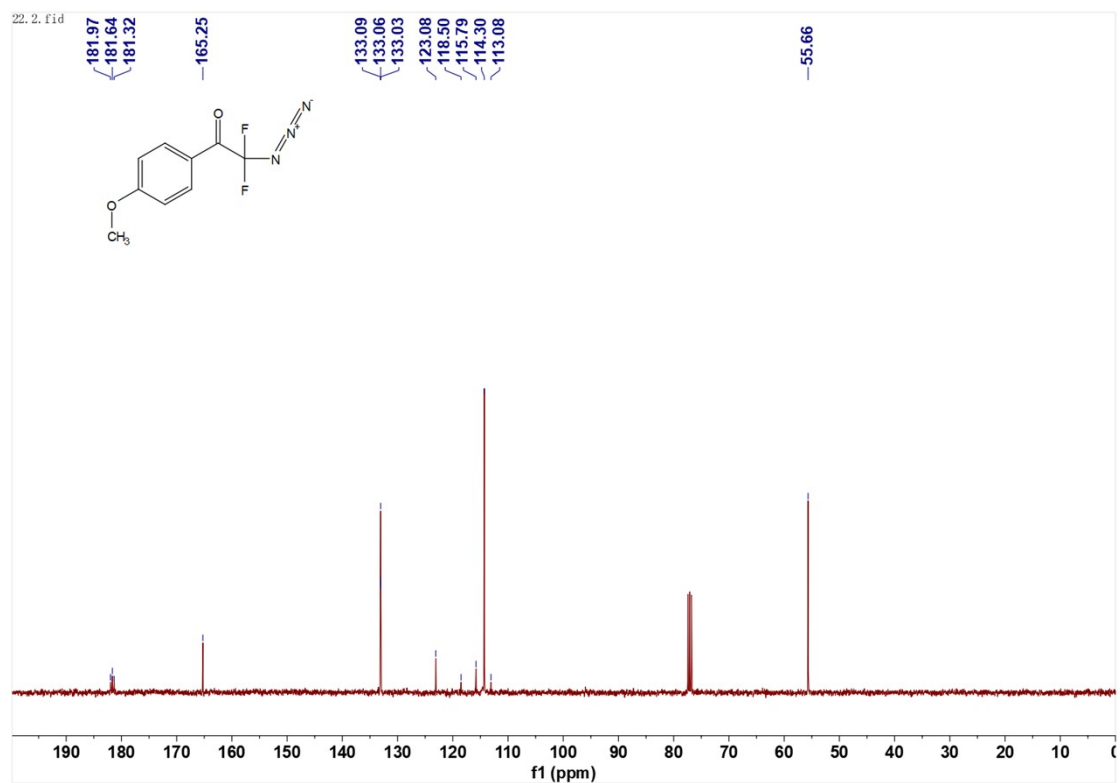

**<sup>13</sup>C NMR spectra of 2d**

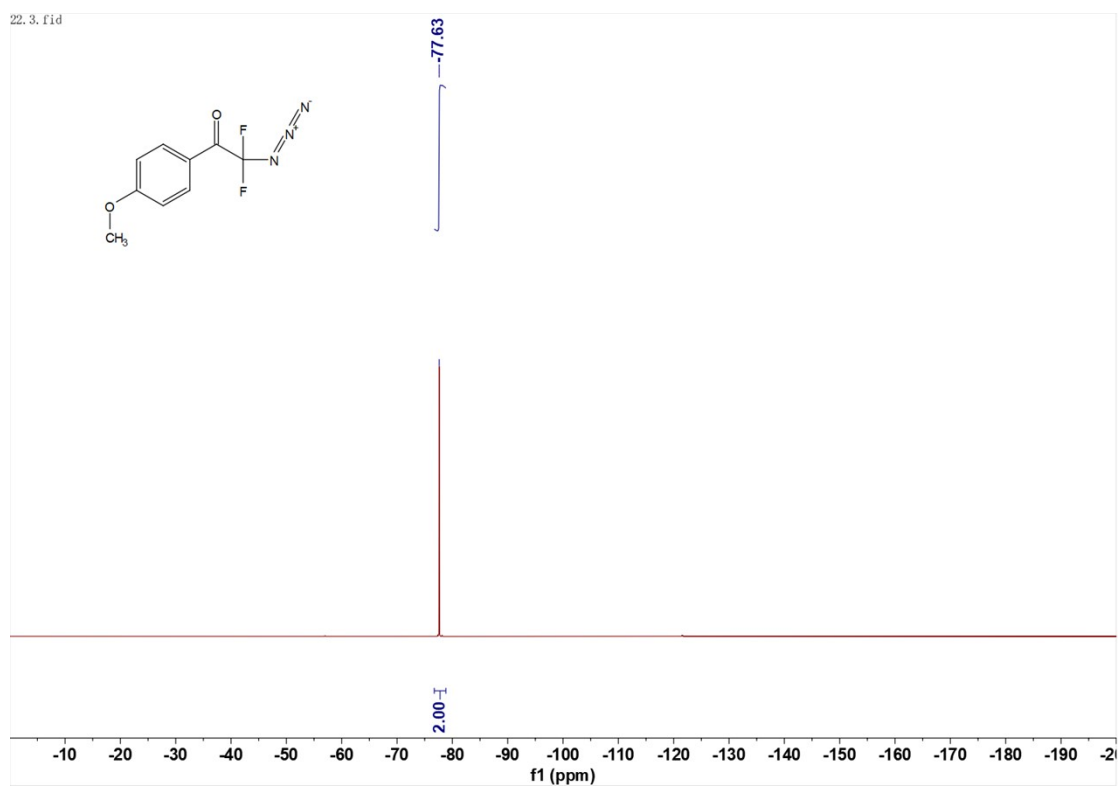

**<sup>19</sup>F NMR spectra of 2d**

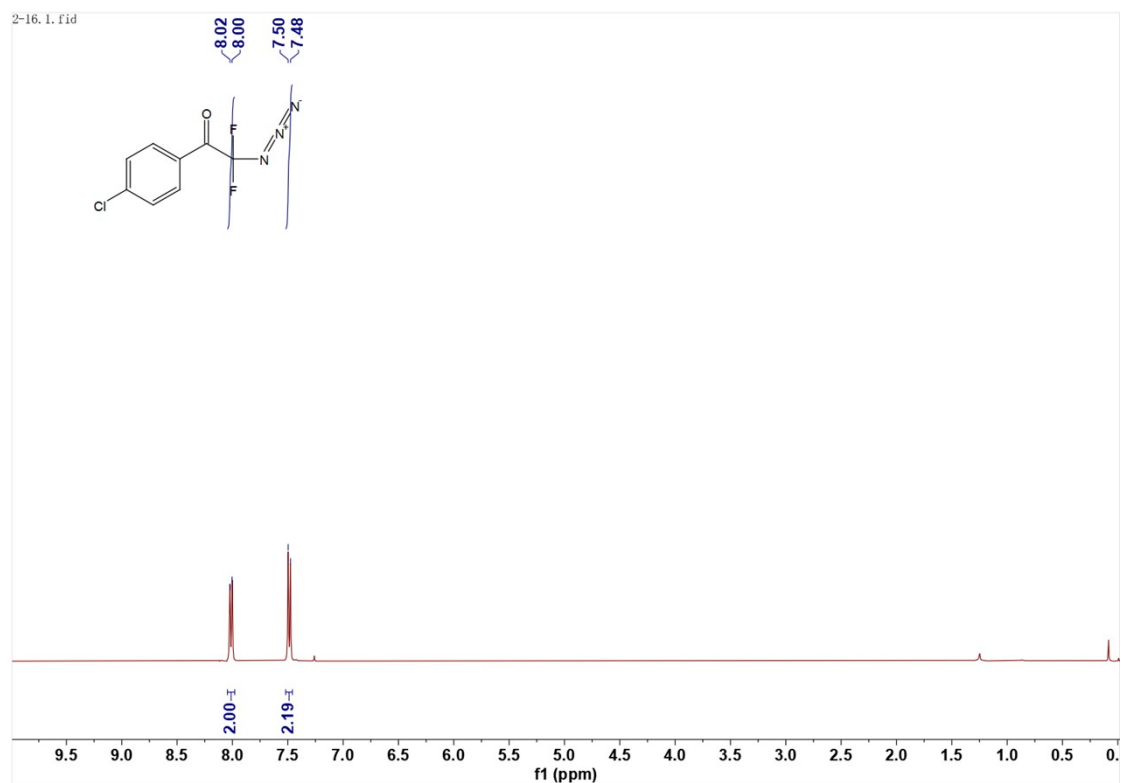

<sup>1</sup>H NMR spectra of 2e

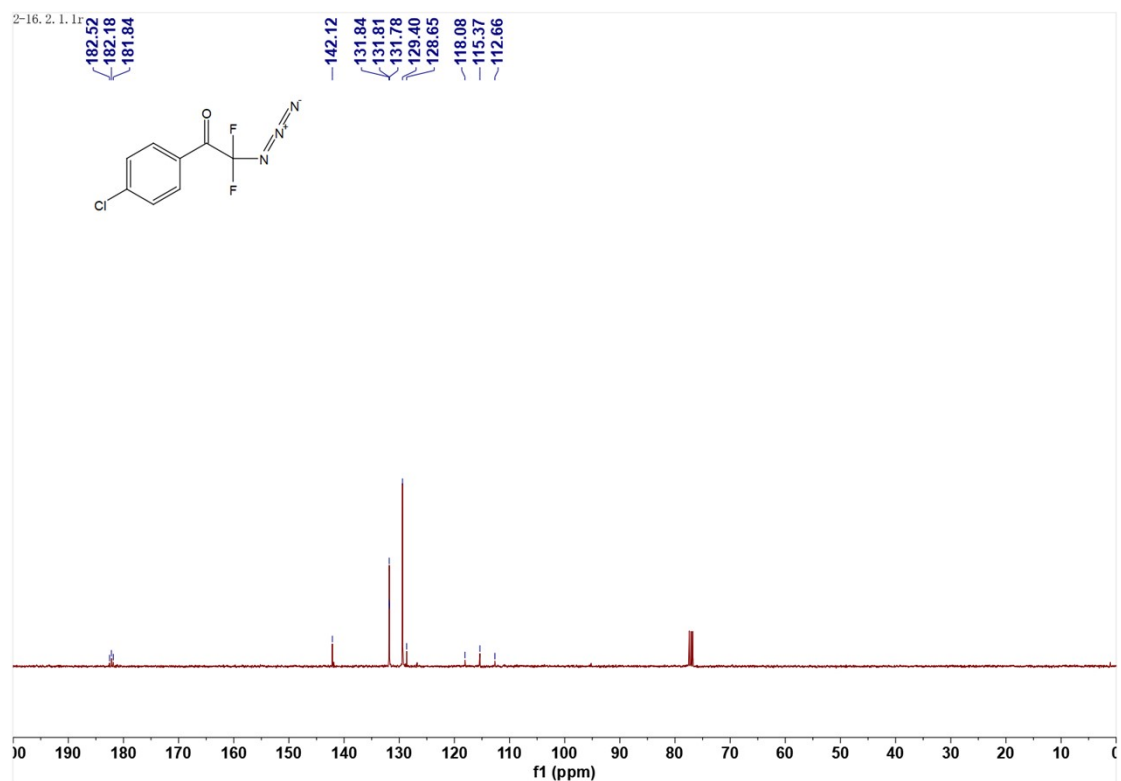

<sup>13</sup>C NMR spectra of 2e

2-16. 3. fid

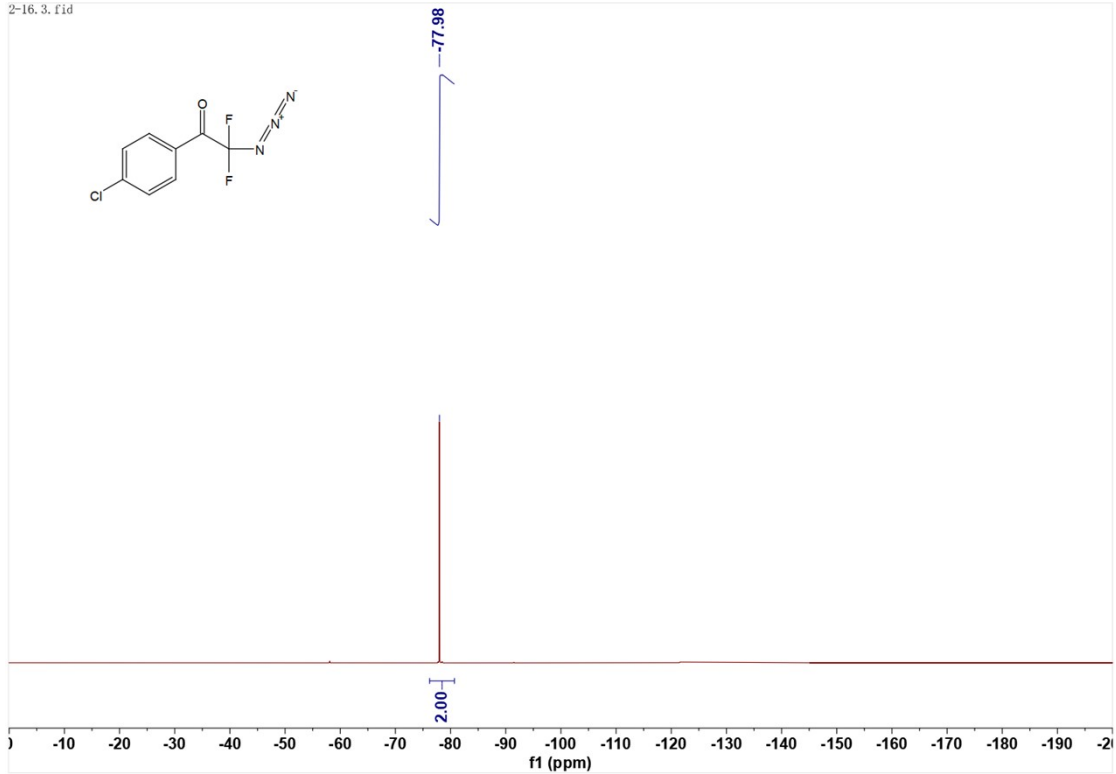

$^{19}\text{F}$  NMR spectra of 2e

43. 1. 1. 1r

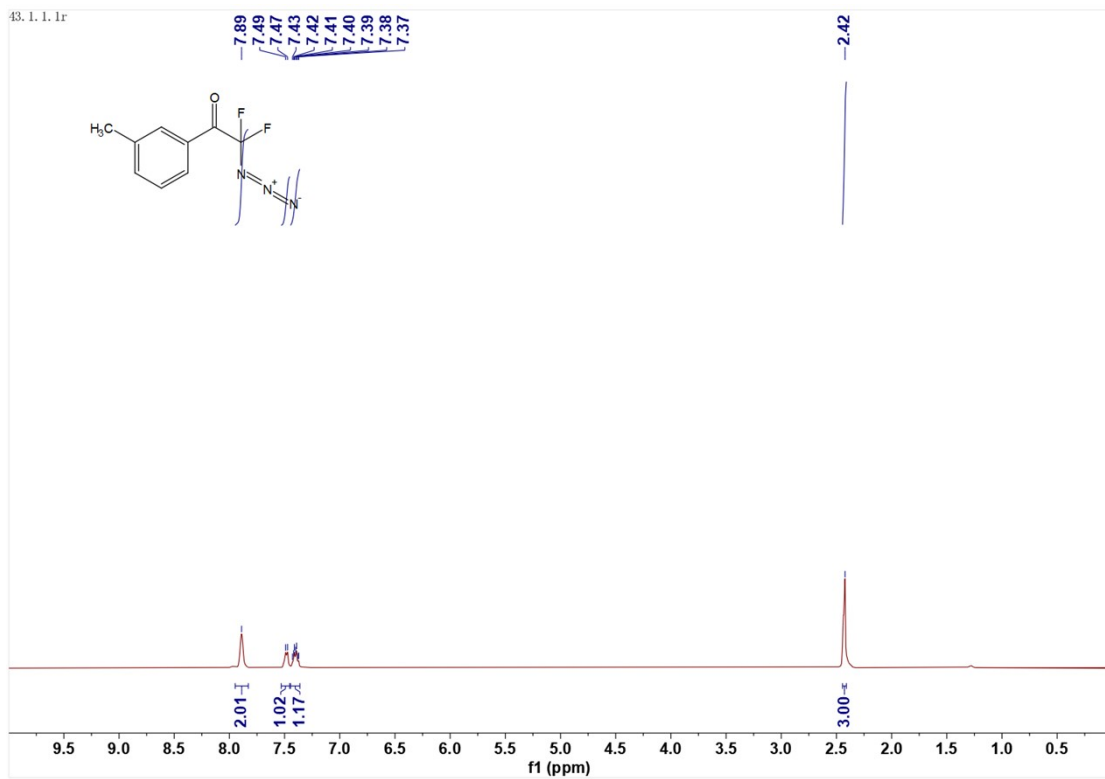

$^1\text{H}$  NMR spectra of 2f



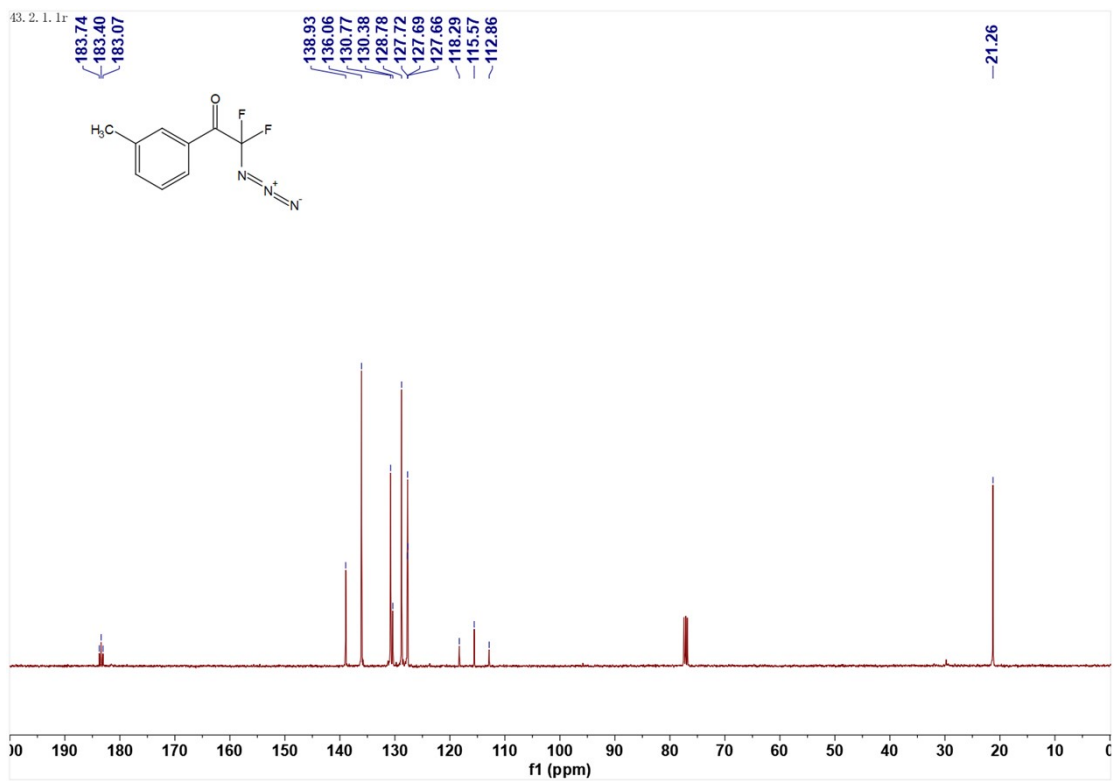

**<sup>13</sup>C NMR spectra of 2f**

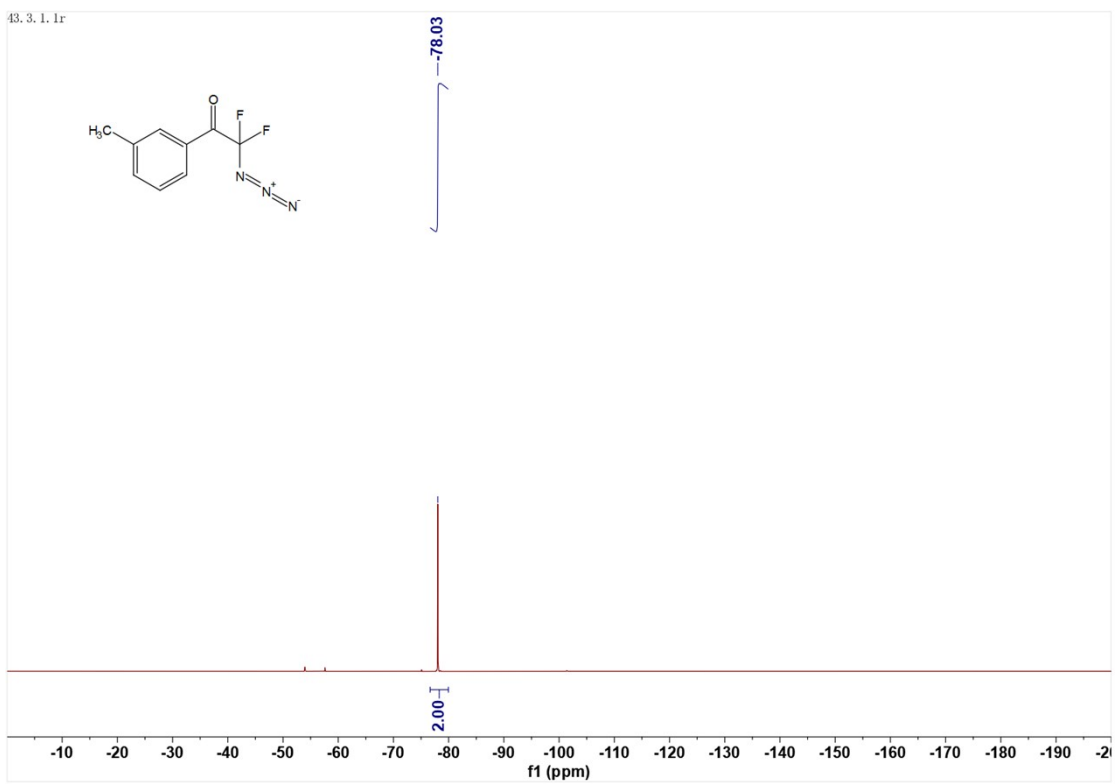

**<sup>19</sup>F NMR spectra of 2f**

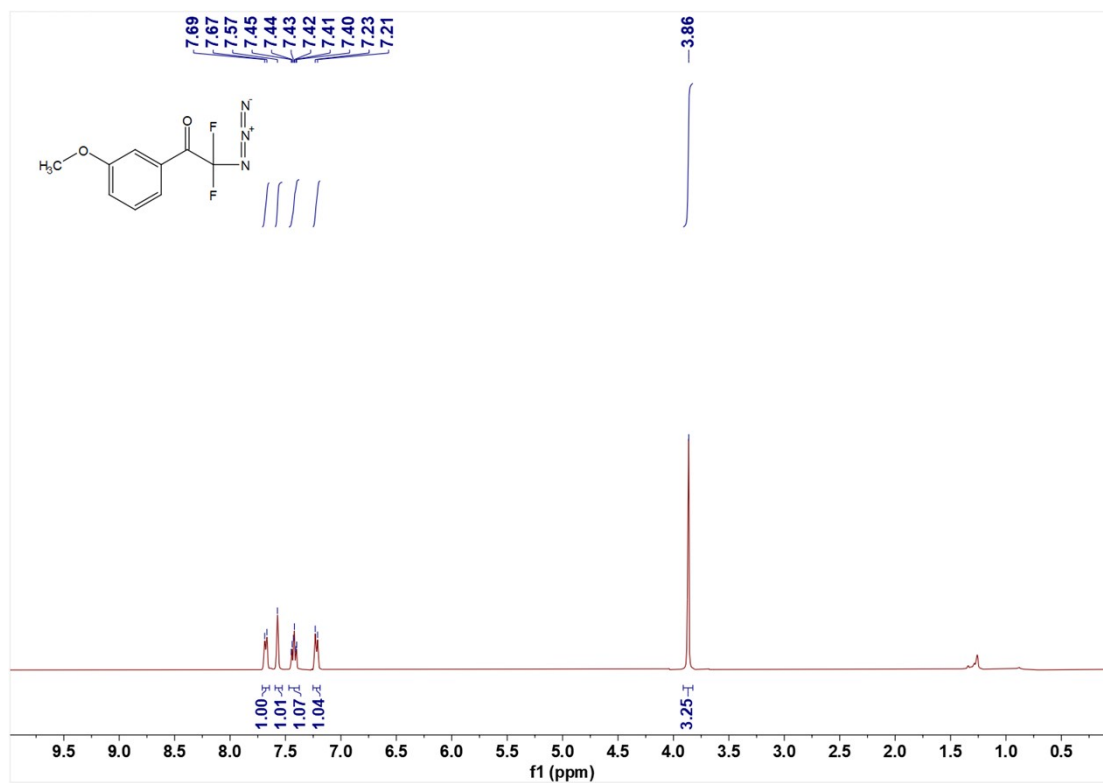

<sup>1</sup>H NMR spectra of 2g

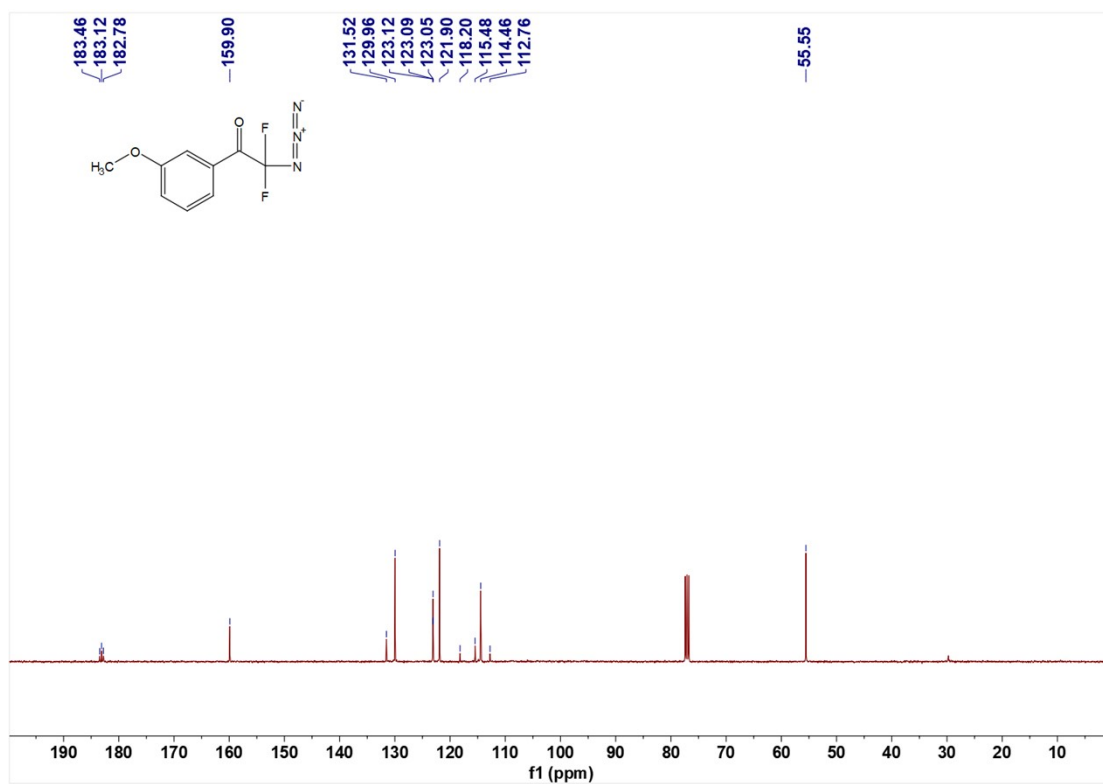

<sup>13</sup>C NMR spectra of 2g

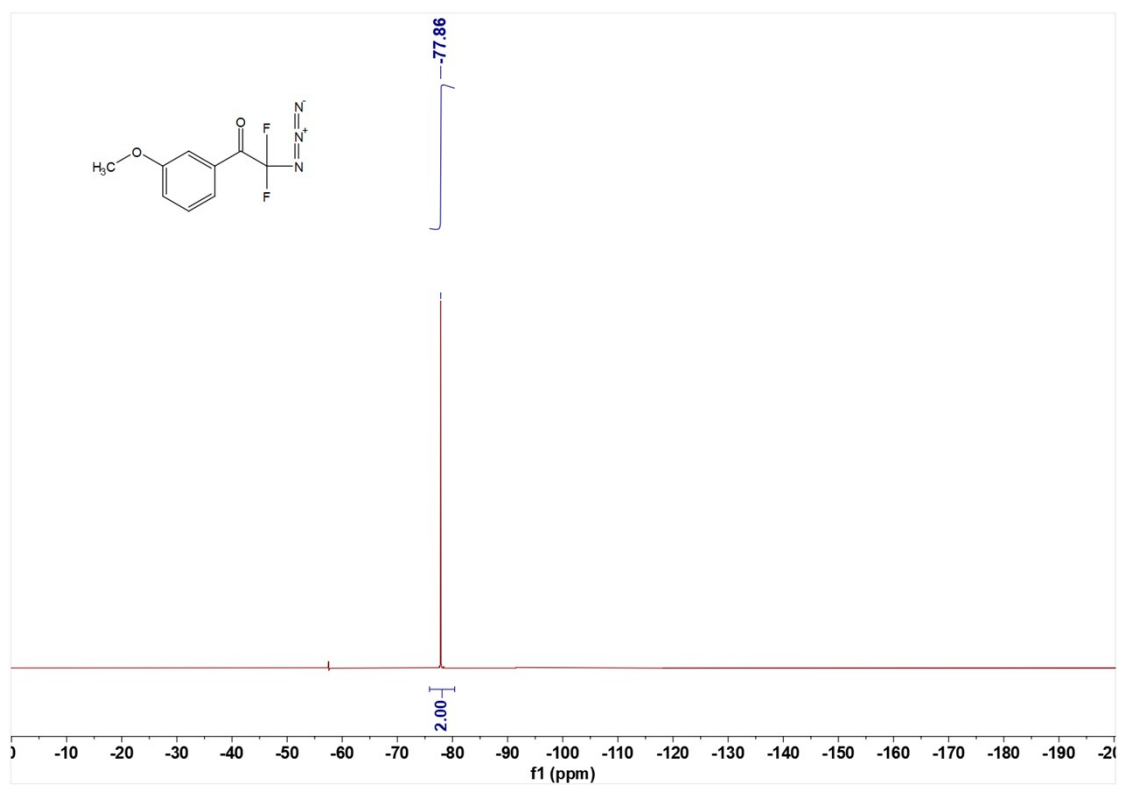

$^{19}\text{F}$  NMR spectra of 2g

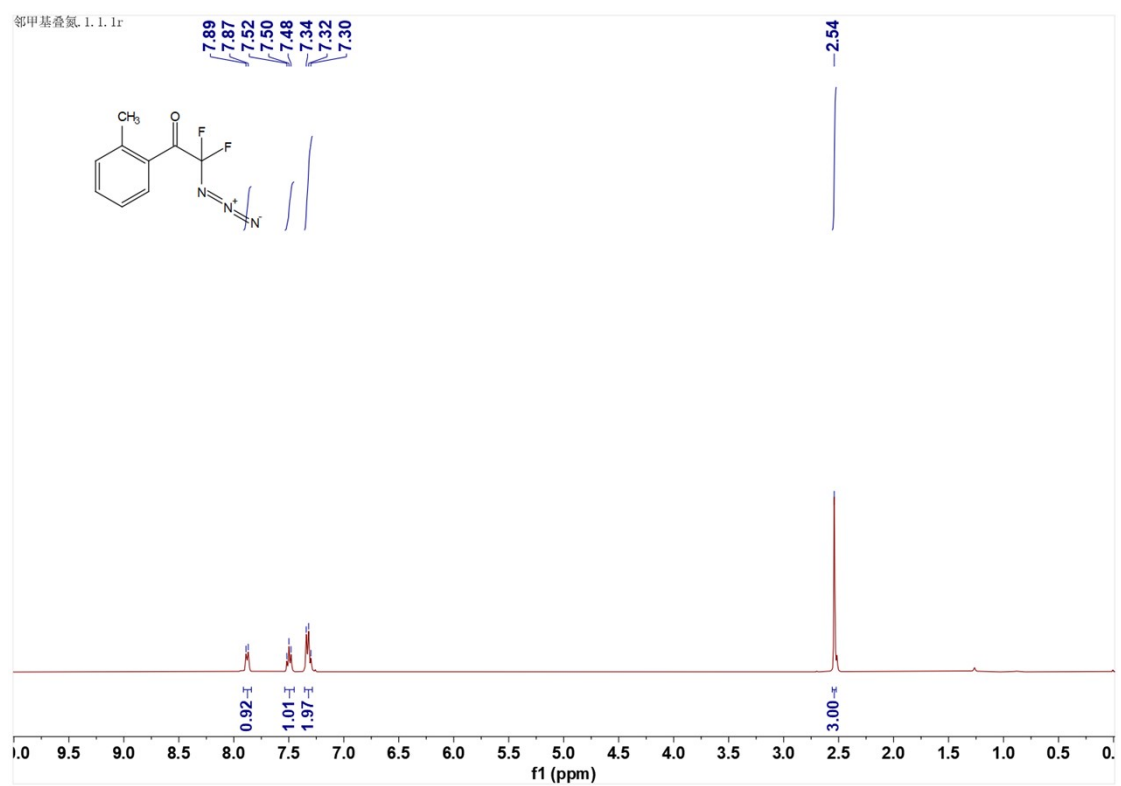

$^1\text{H}$  NMR spectra of 2h

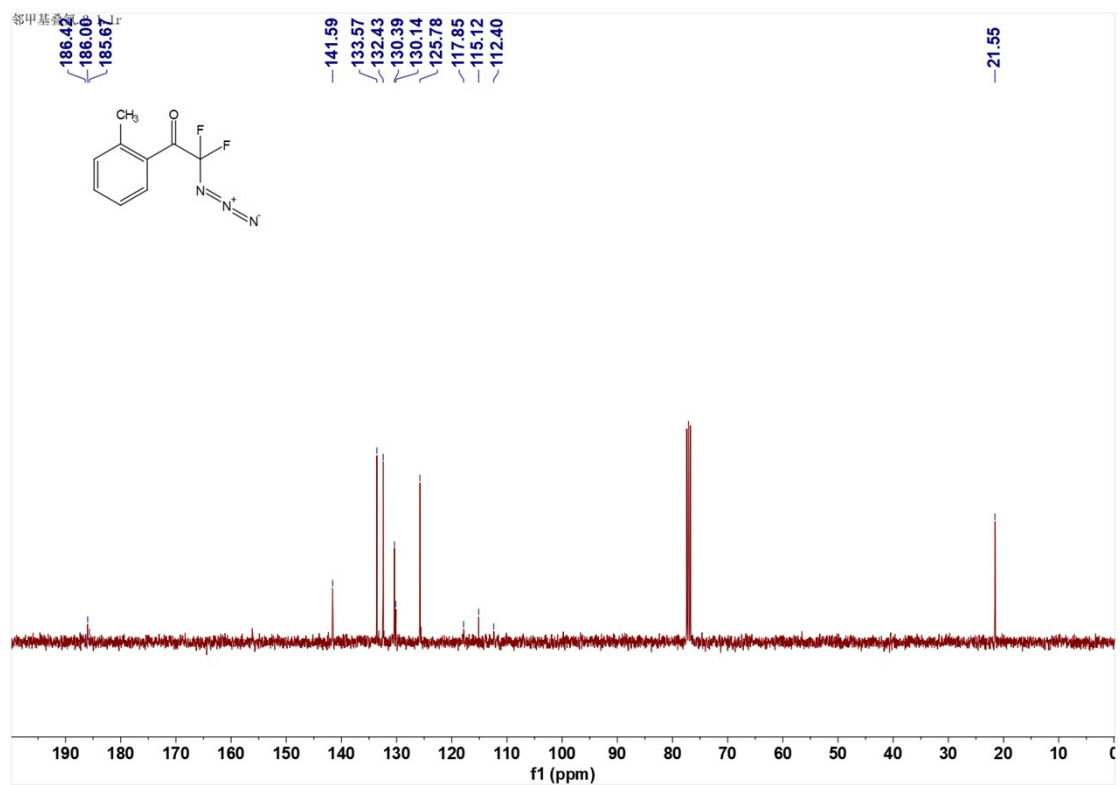

<sup>13</sup>C NMR spectra of 2h

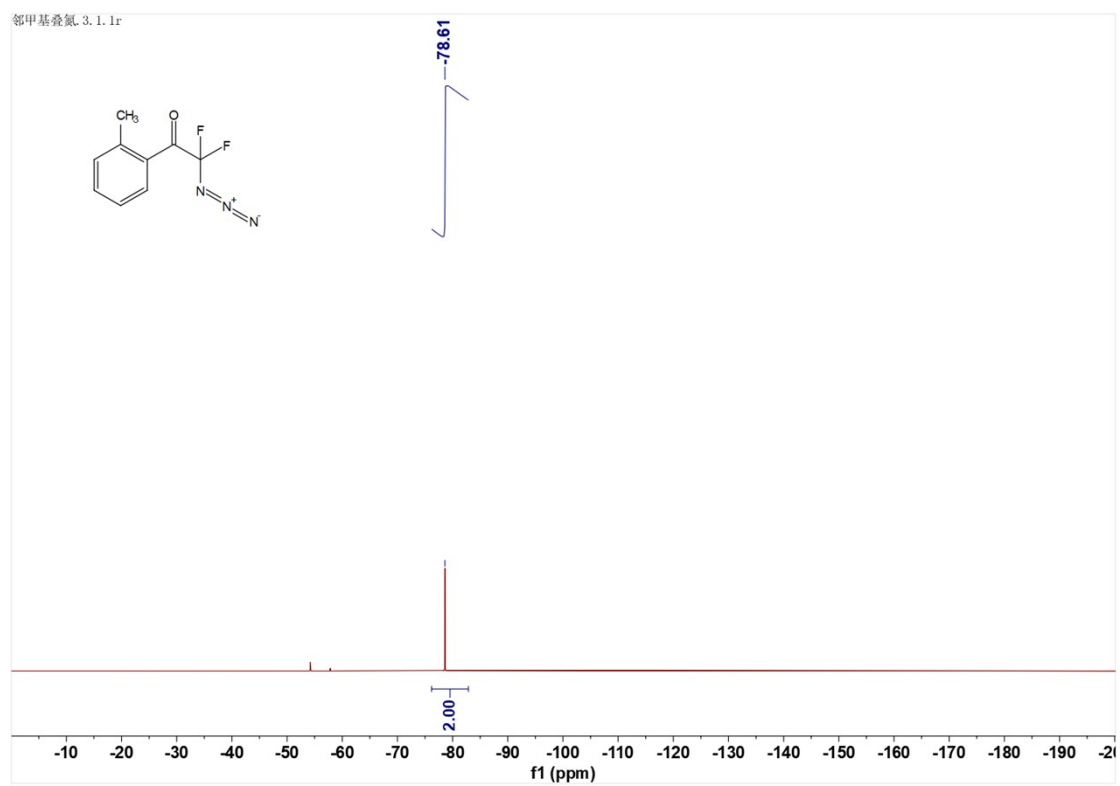

<sup>19</sup>F NMR spectra of 2h

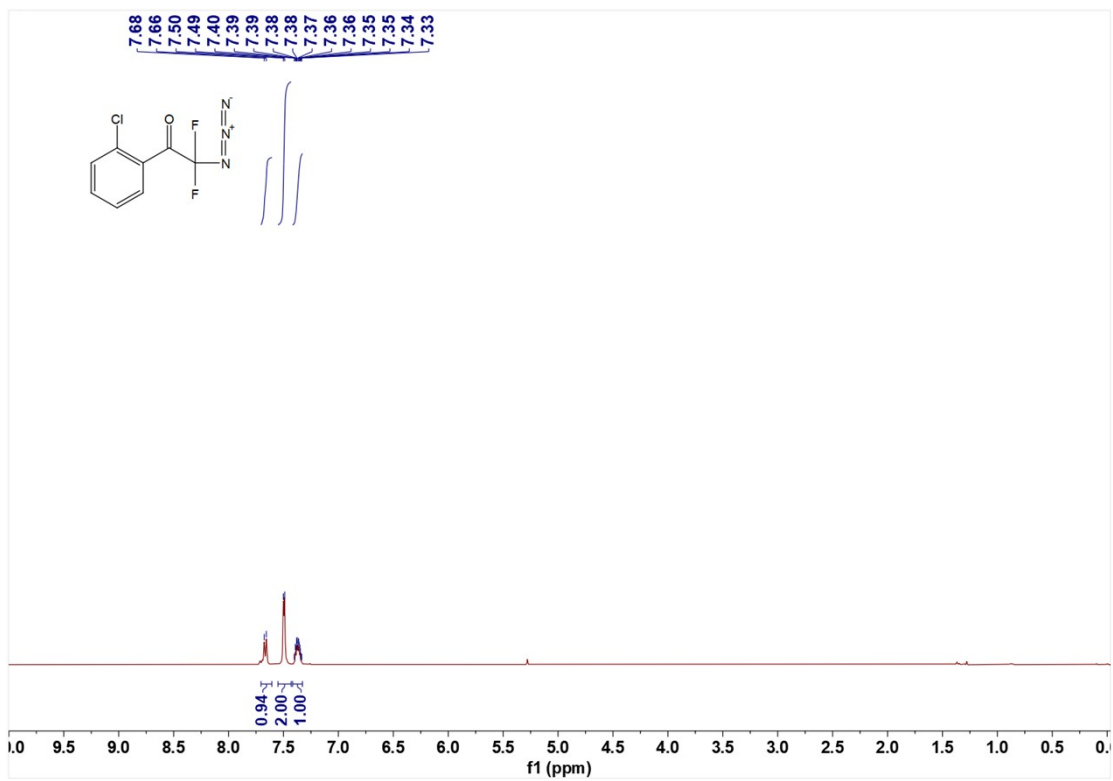

<sup>1</sup>H NMR spectra of 2i

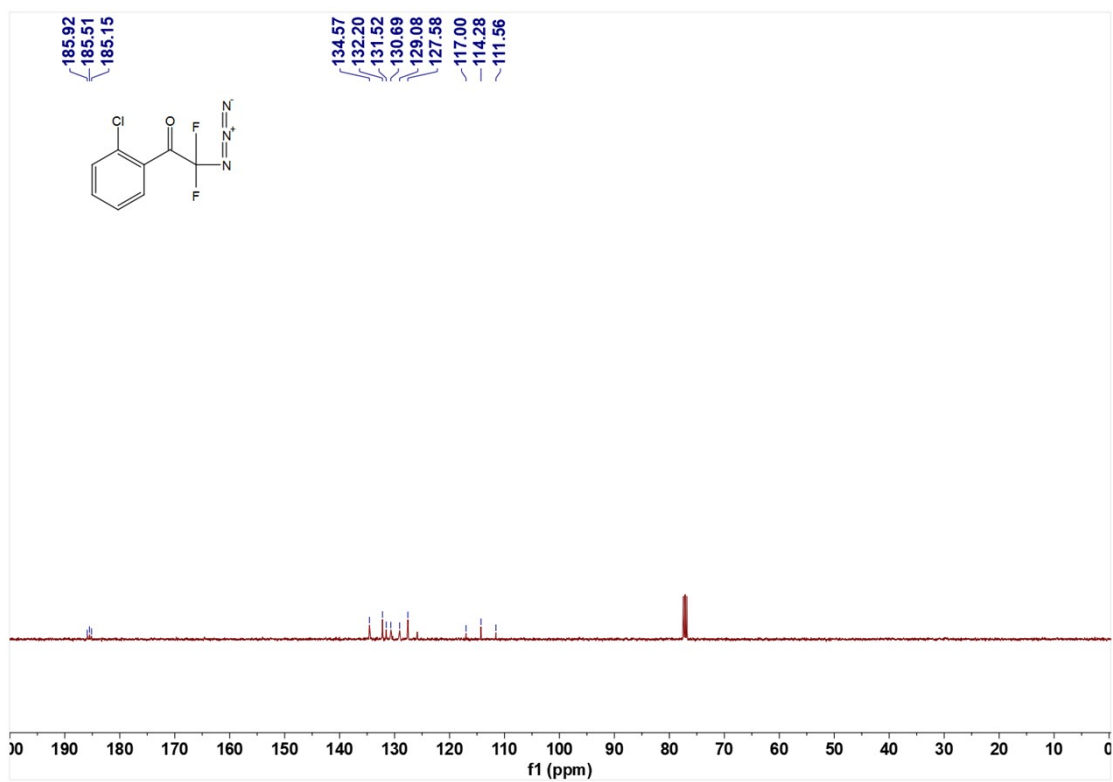

<sup>13</sup>C NMR spectra of 2i

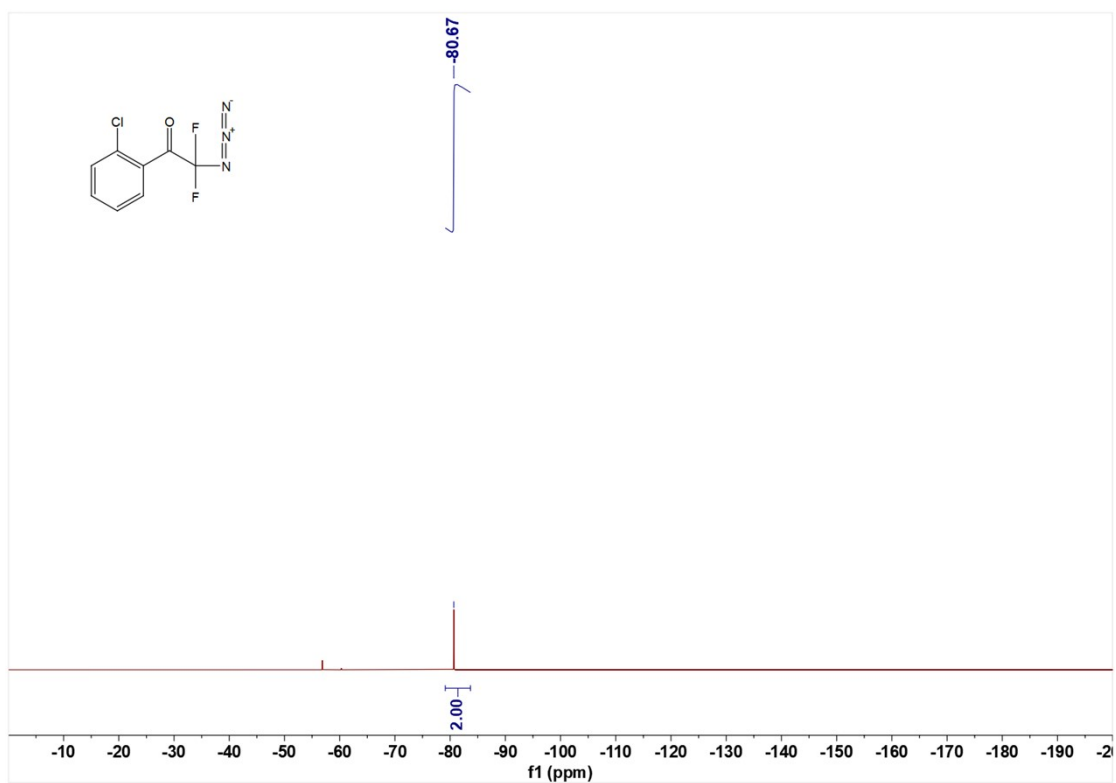

$^{19}\text{F}$  NMR spectra of 2i

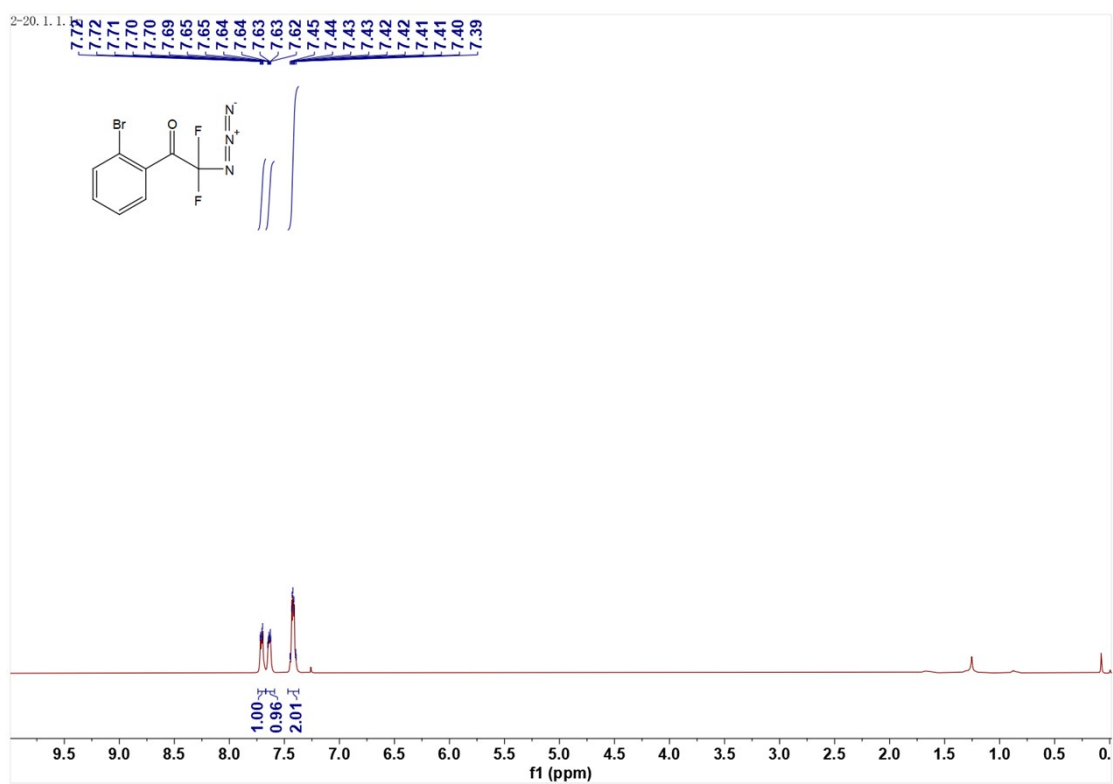

$^1\text{H}$  NMR spectra of 2j

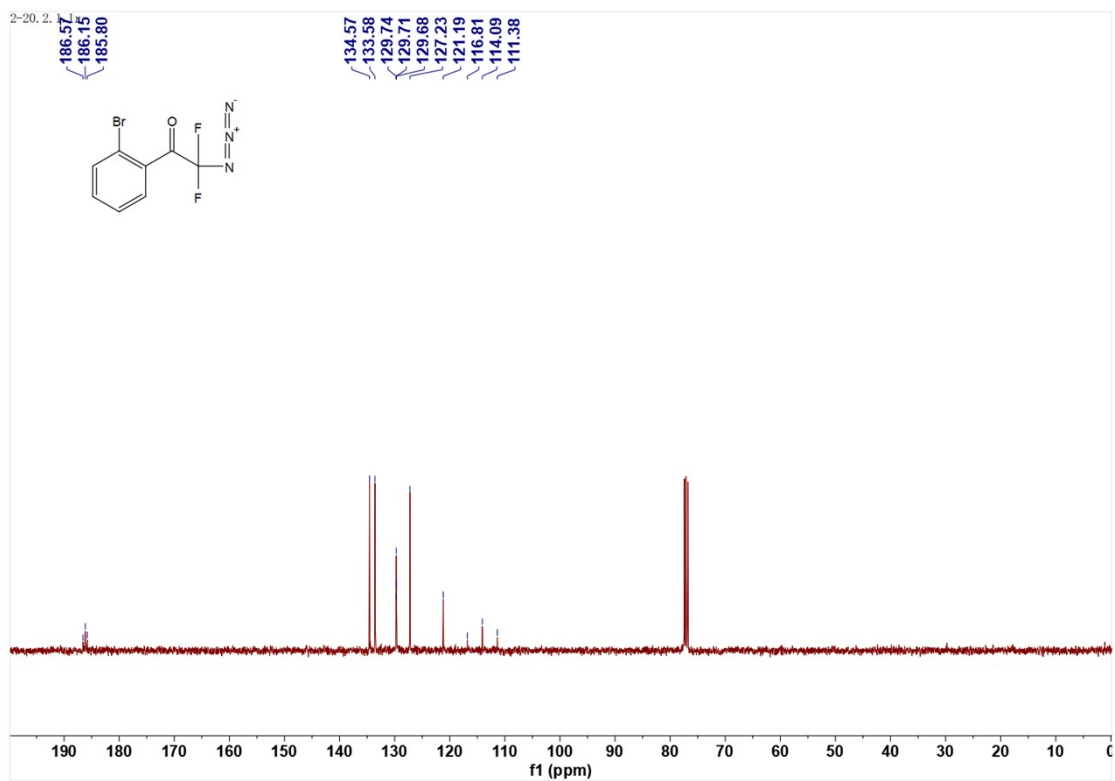

<sup>13</sup>C NMR spectra of 2j

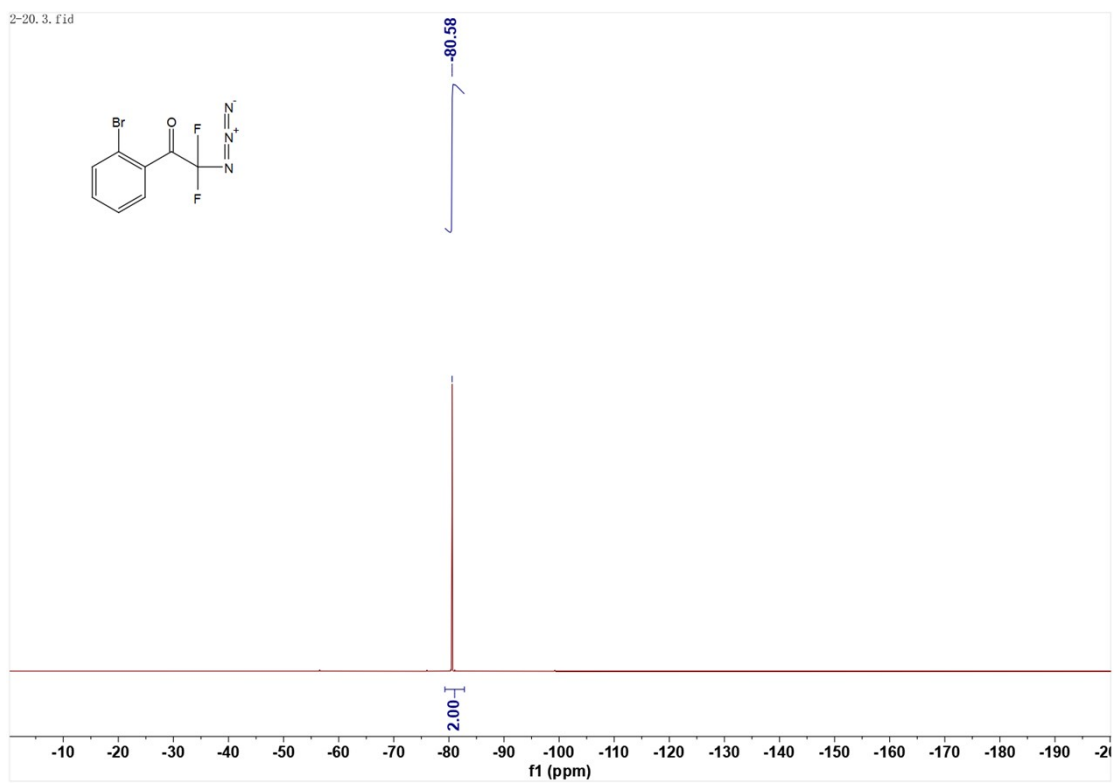

<sup>19</sup>F NMR spectra of 2j

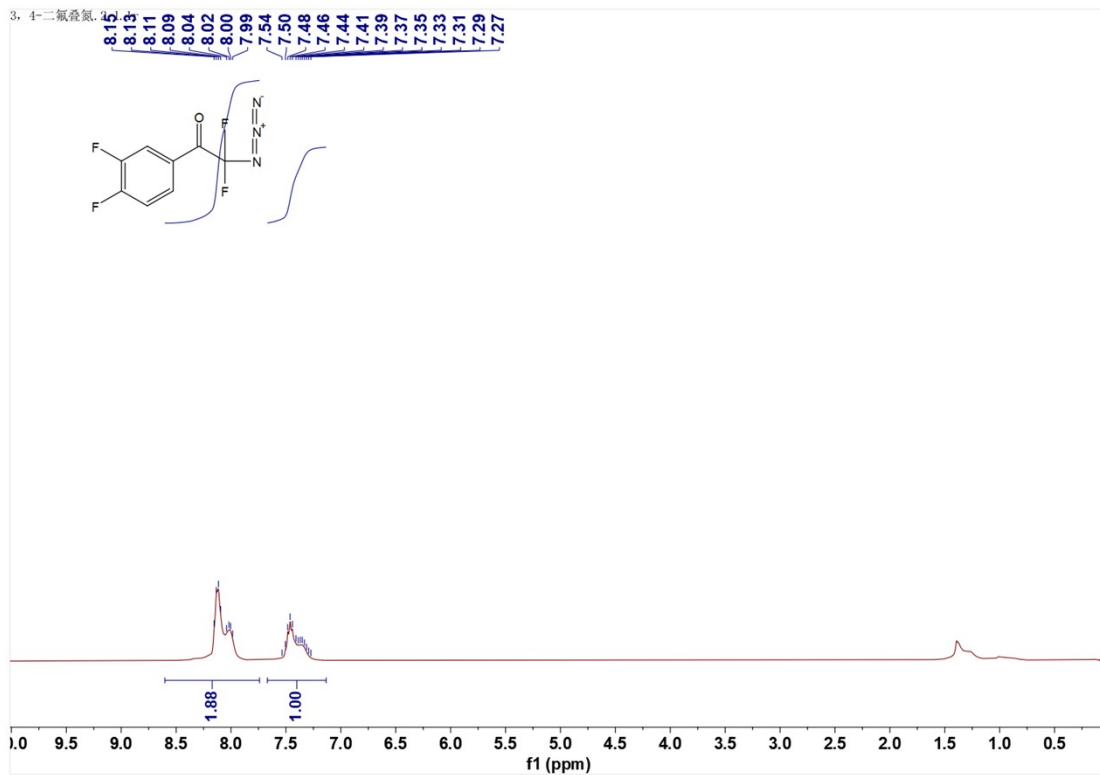

$^1\text{H}$  NMR spectra of 2k

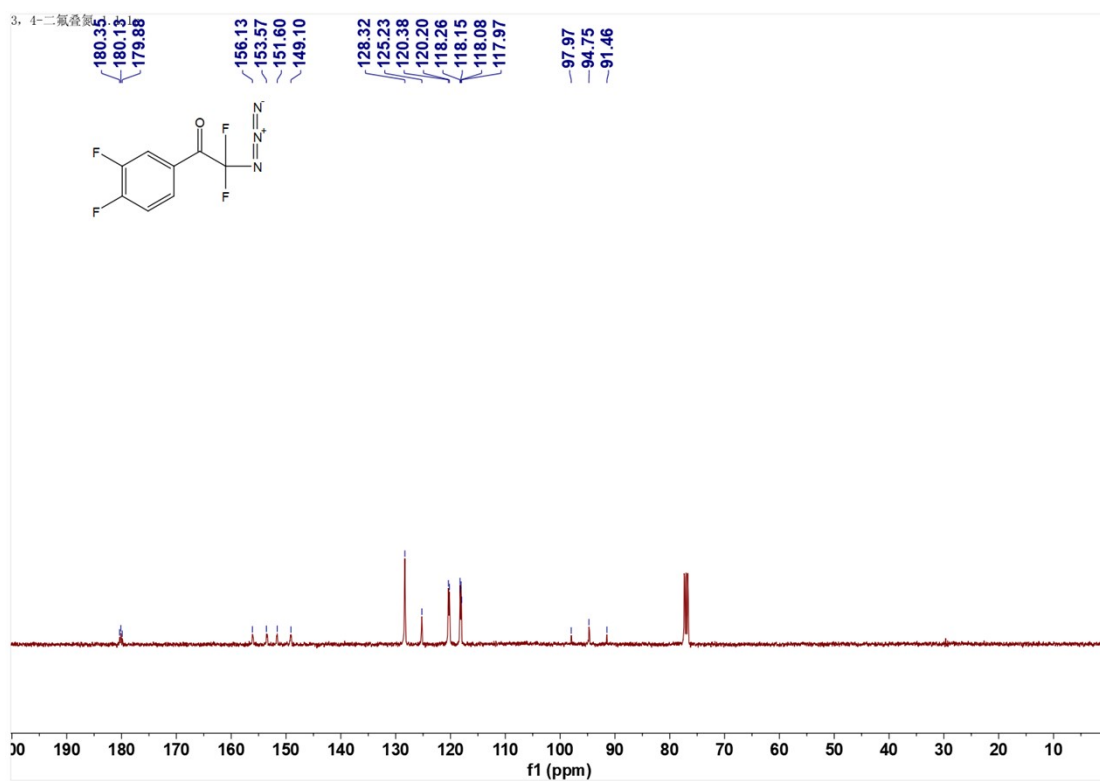

$^{13}\text{C}$  NMR spectra of 2k



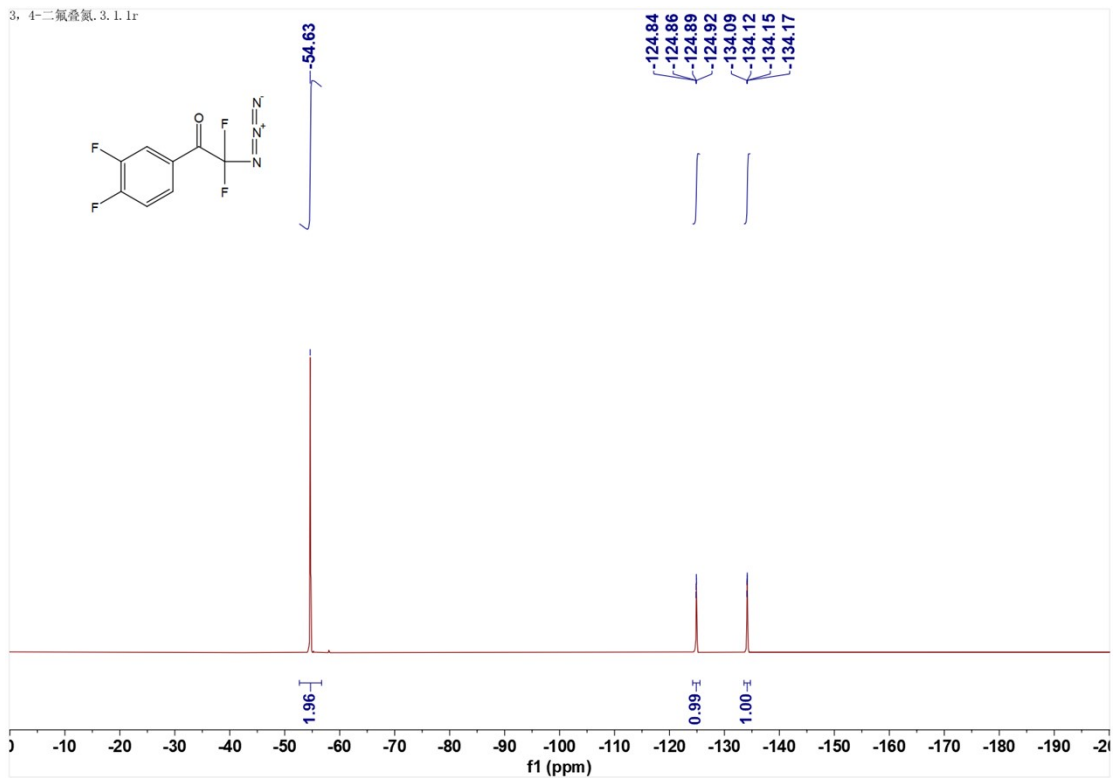

$^{19}\text{F}$  NMR spectra of 2k

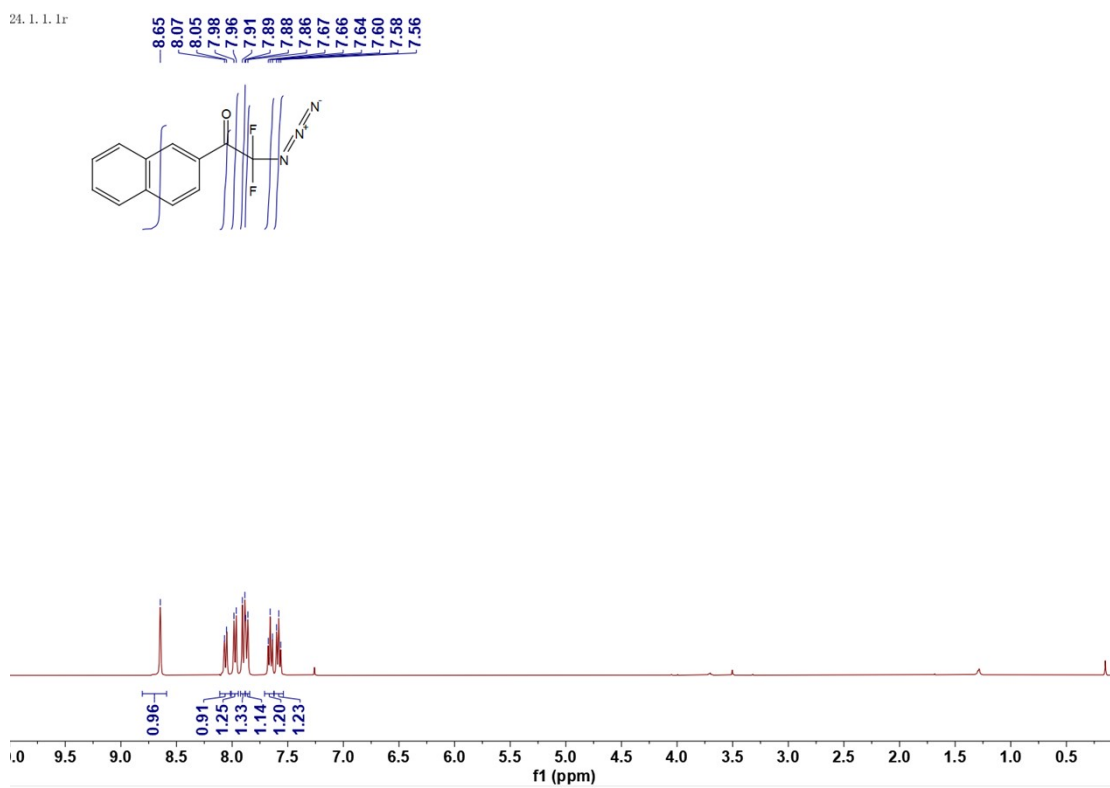

$^1\text{H}$  NMR spectra of 2l

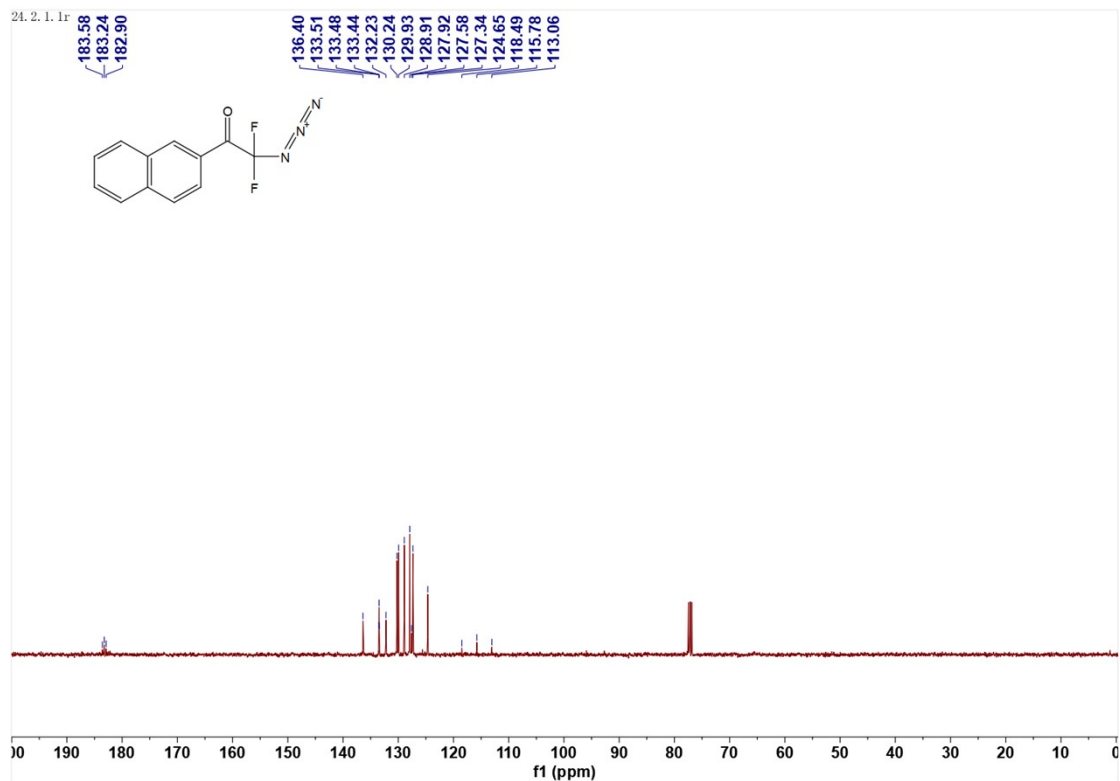

**<sup>13</sup>C NMR spectra of 21**

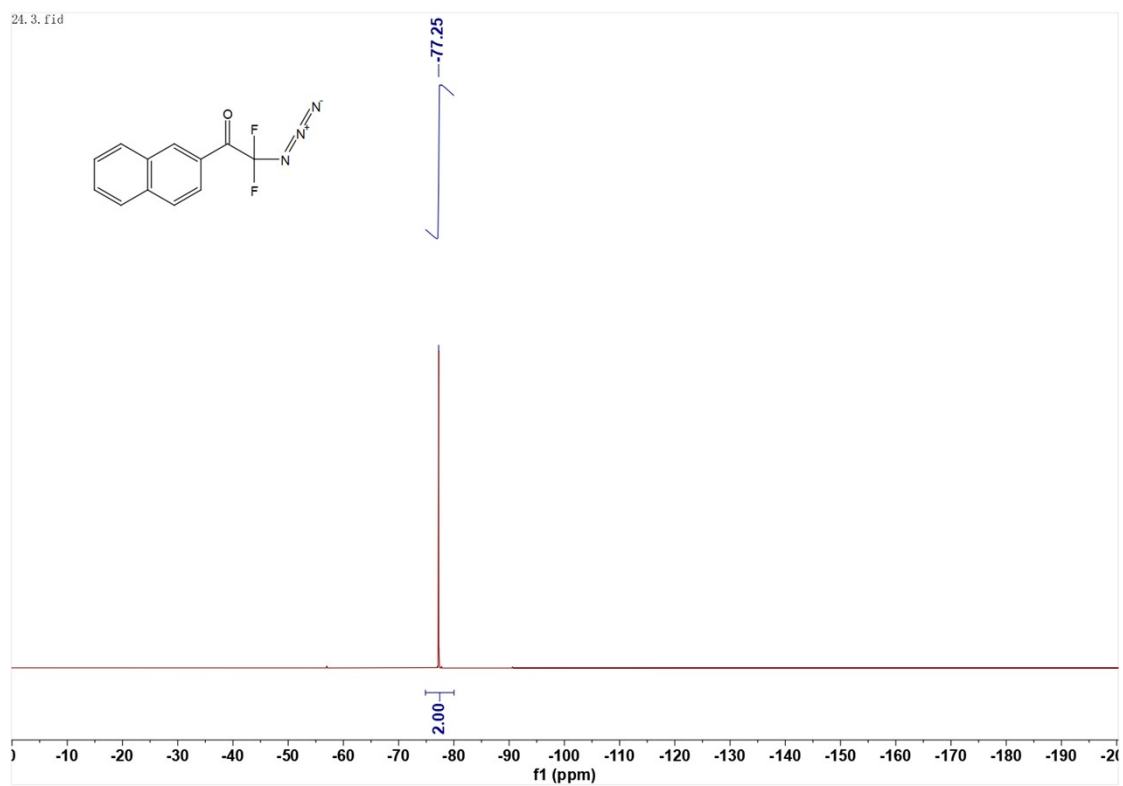

**<sup>19</sup>F NMR spectra of 21**

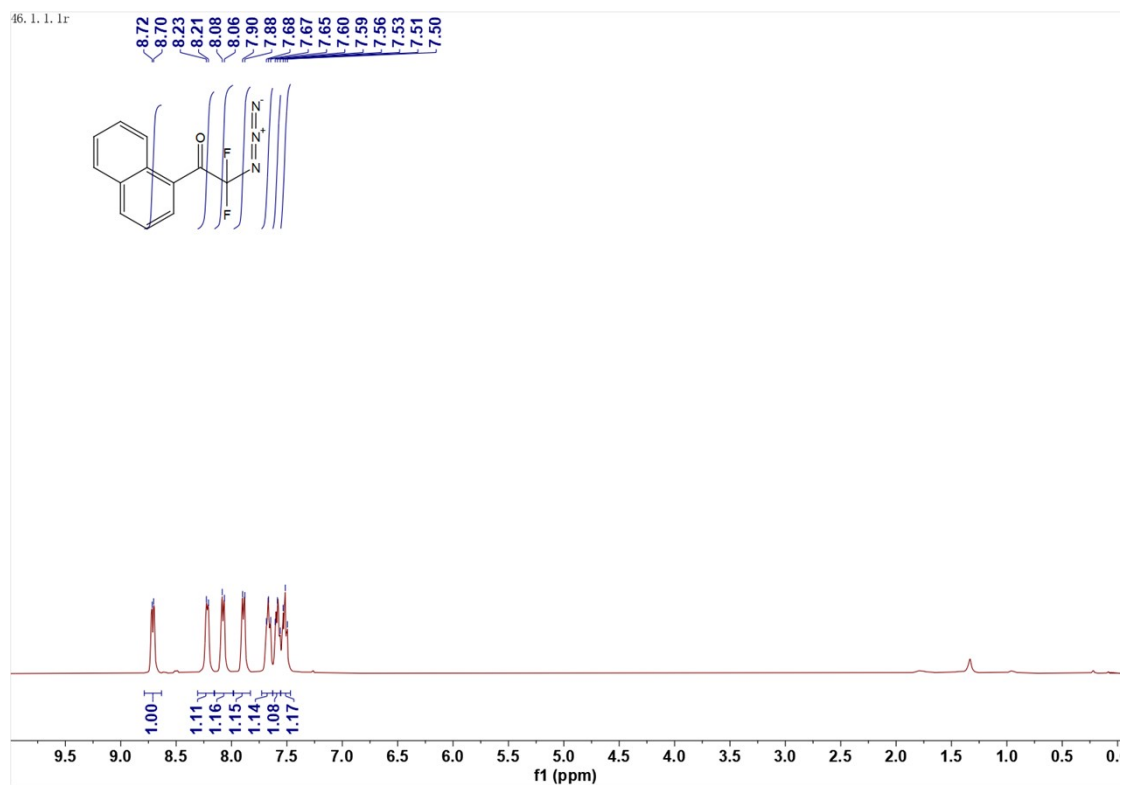

**<sup>1</sup>H NMR spectra of 2m**

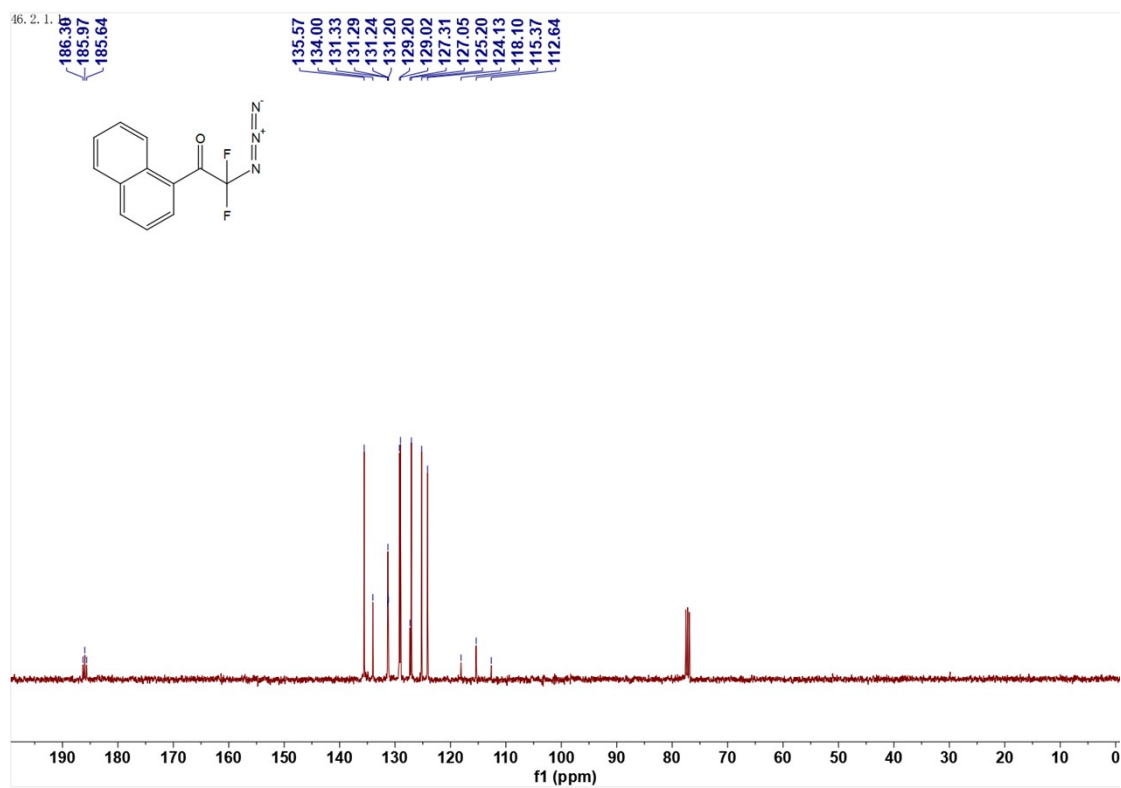

**<sup>13</sup>C NMR spectra of 2m**

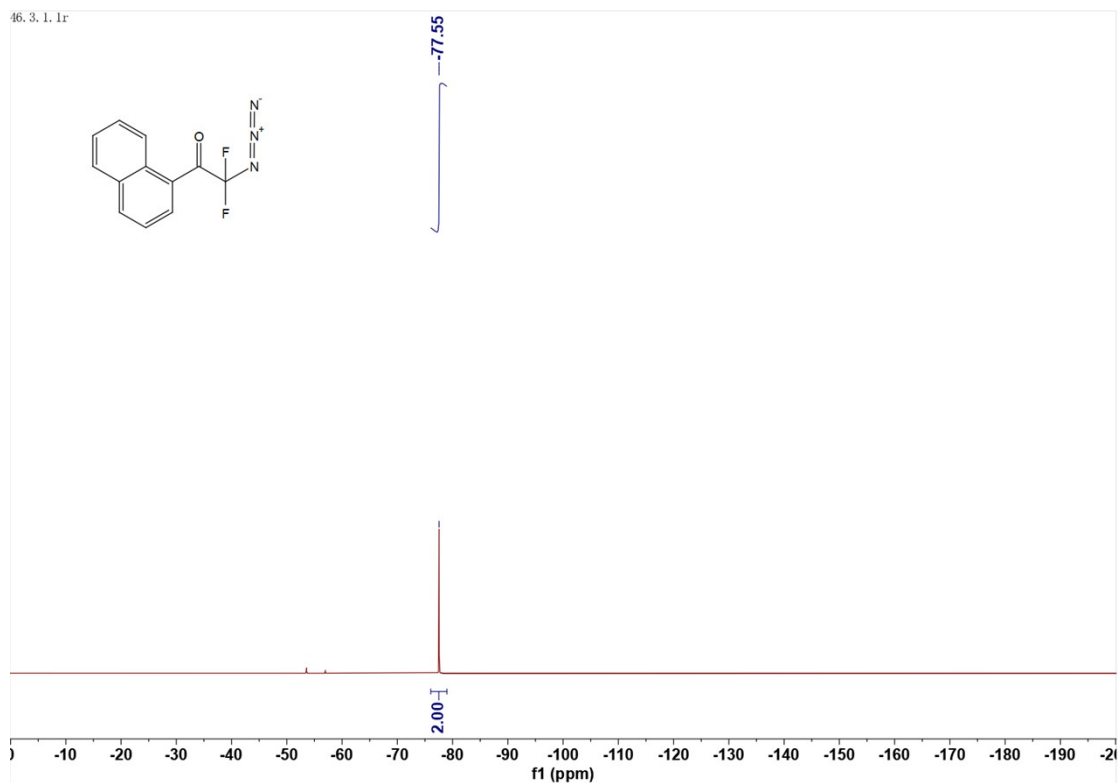

**<sup>19</sup>F NMR spectra of 2m**

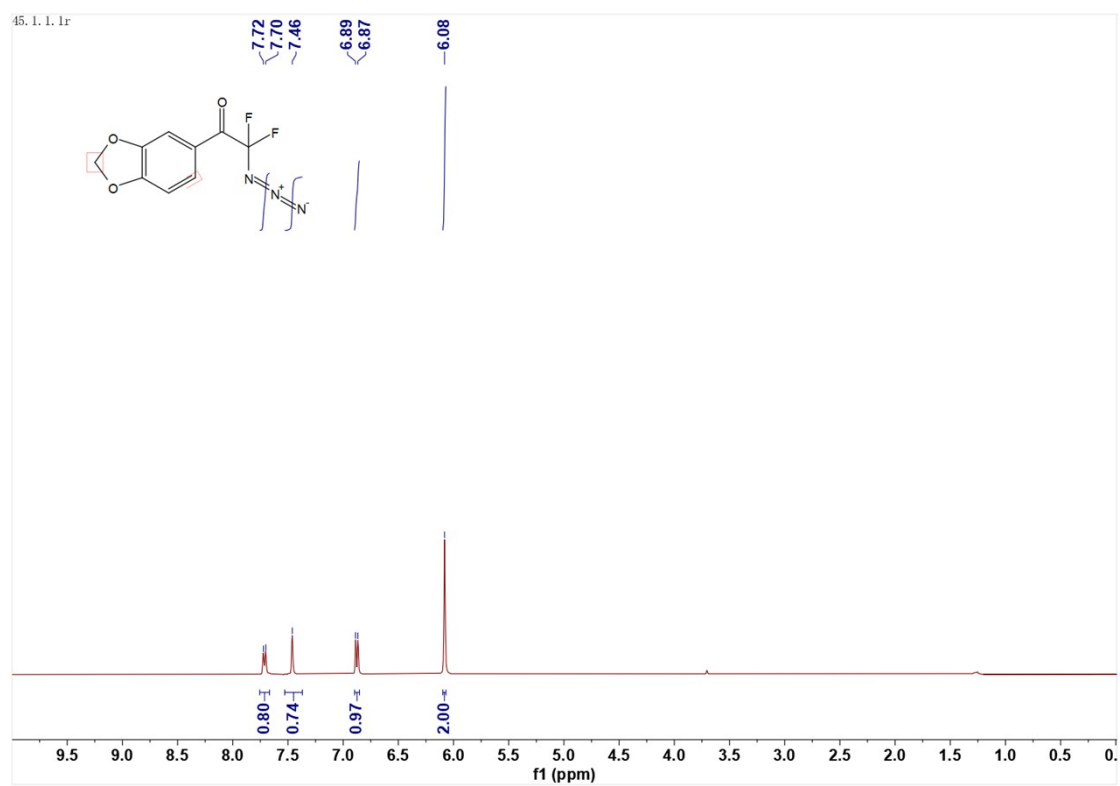

**<sup>1</sup>H NMR spectra of 2n**

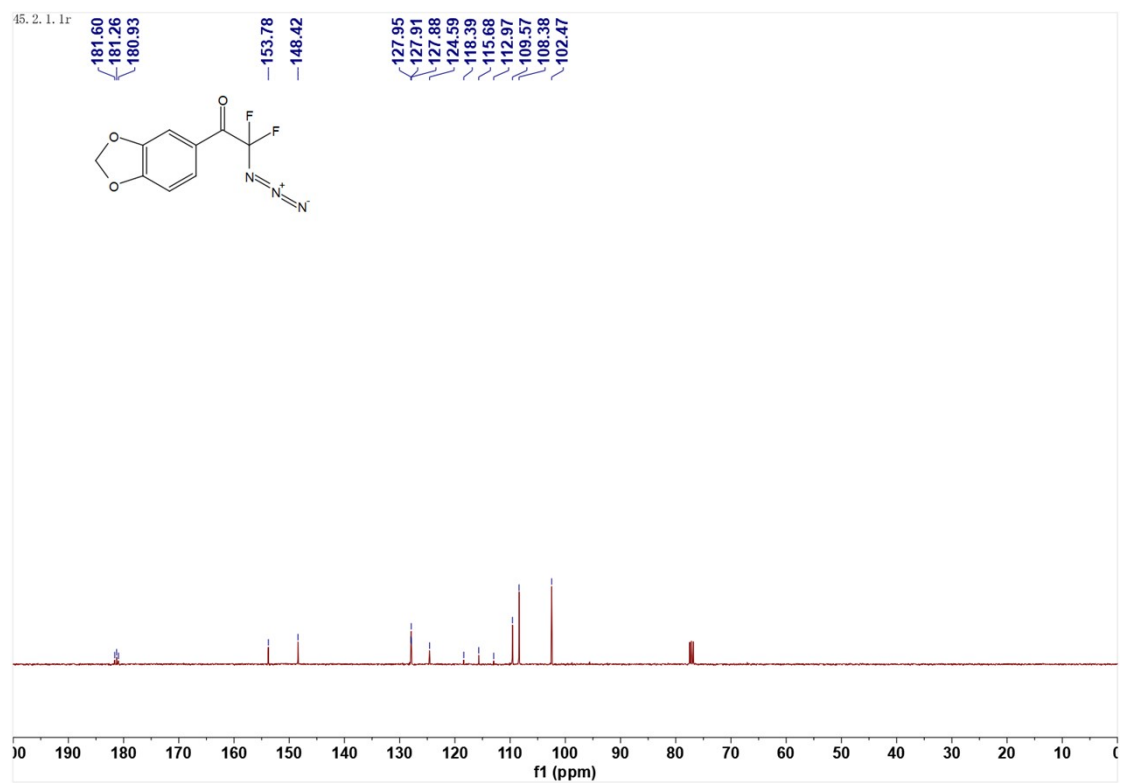

**<sup>13</sup>C NMR spectra of 2n**

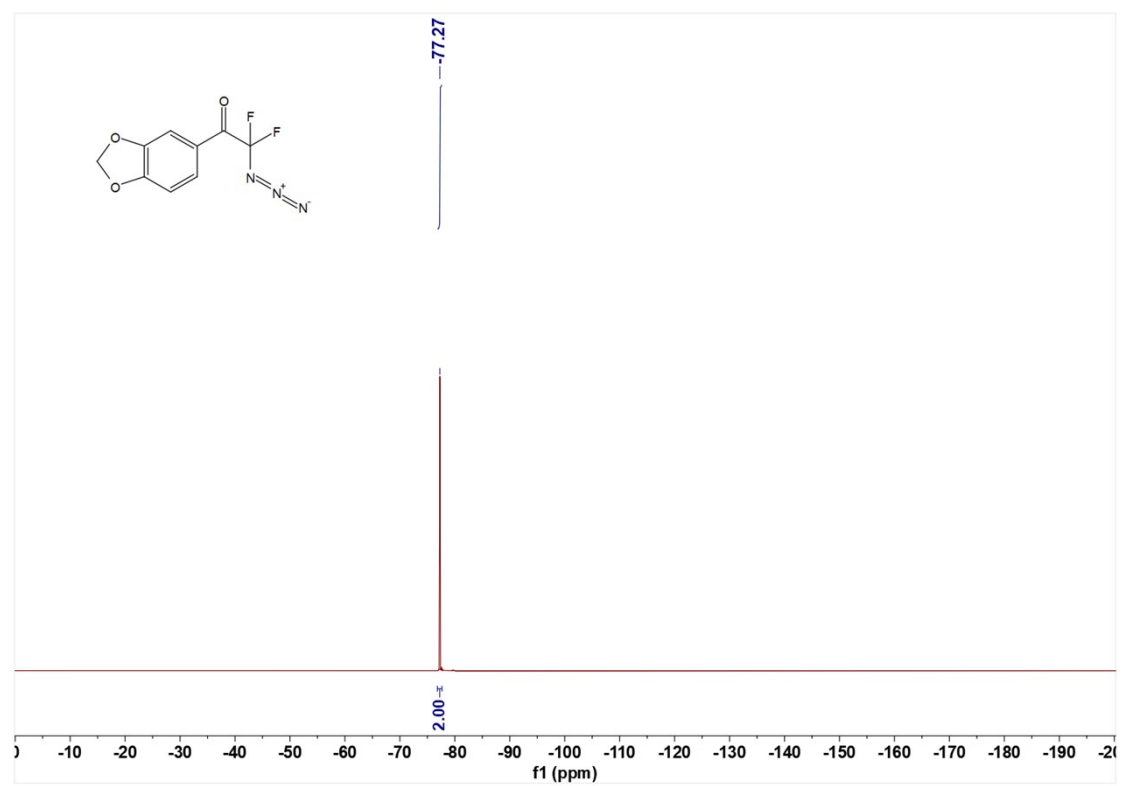

**<sup>19</sup>F NMR spectra of 2n**

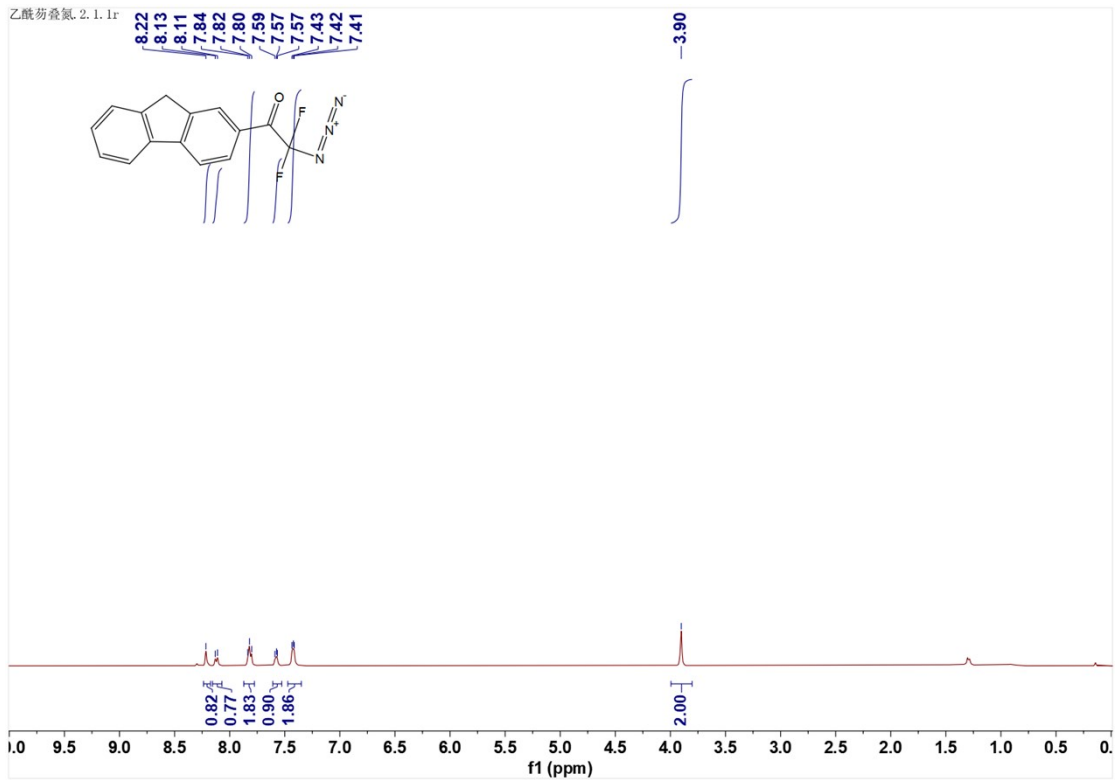

<sup>1</sup>H NMR spectra of 2o

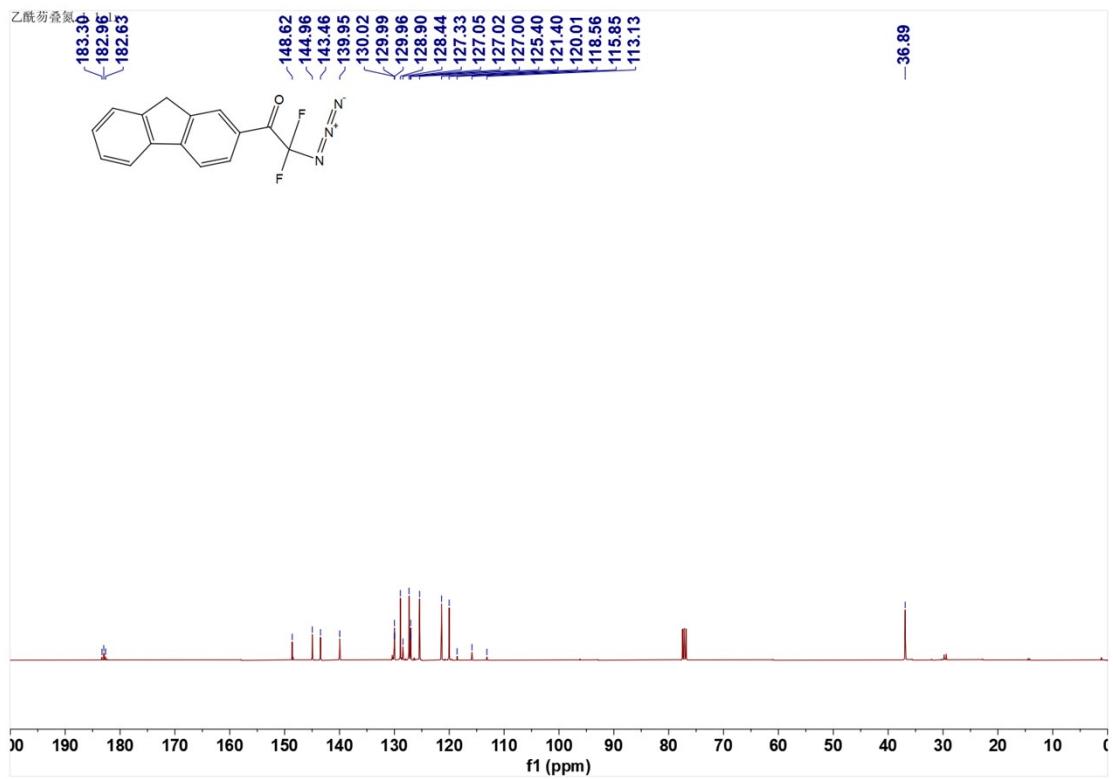

<sup>13</sup>C NMR spectra of 2o

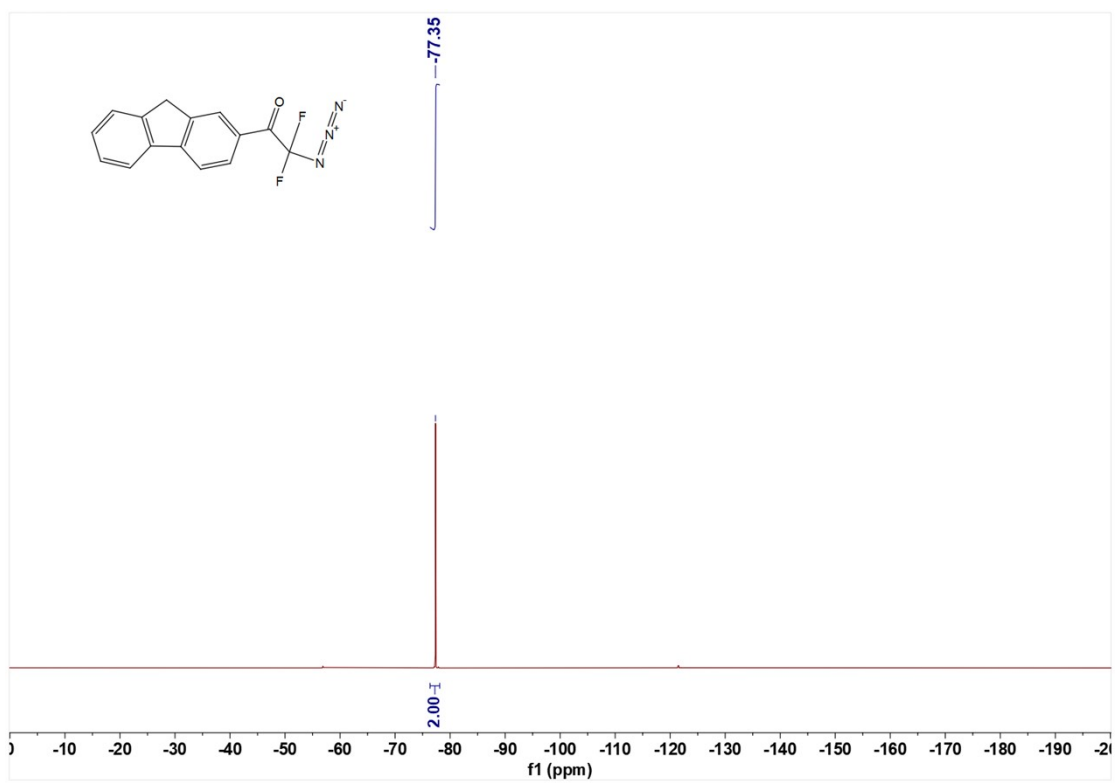

$^{19}\text{F}$  NMR spectra of 2o

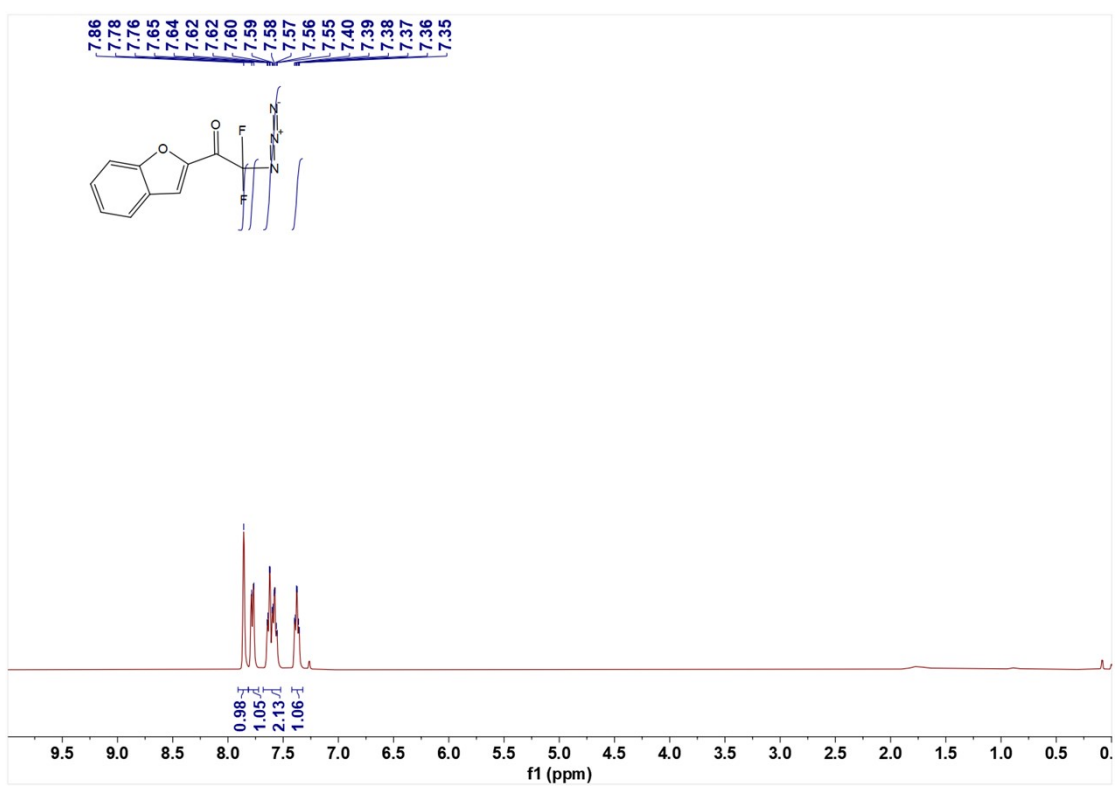

$^1\text{H}$  NMR spectra of 2p

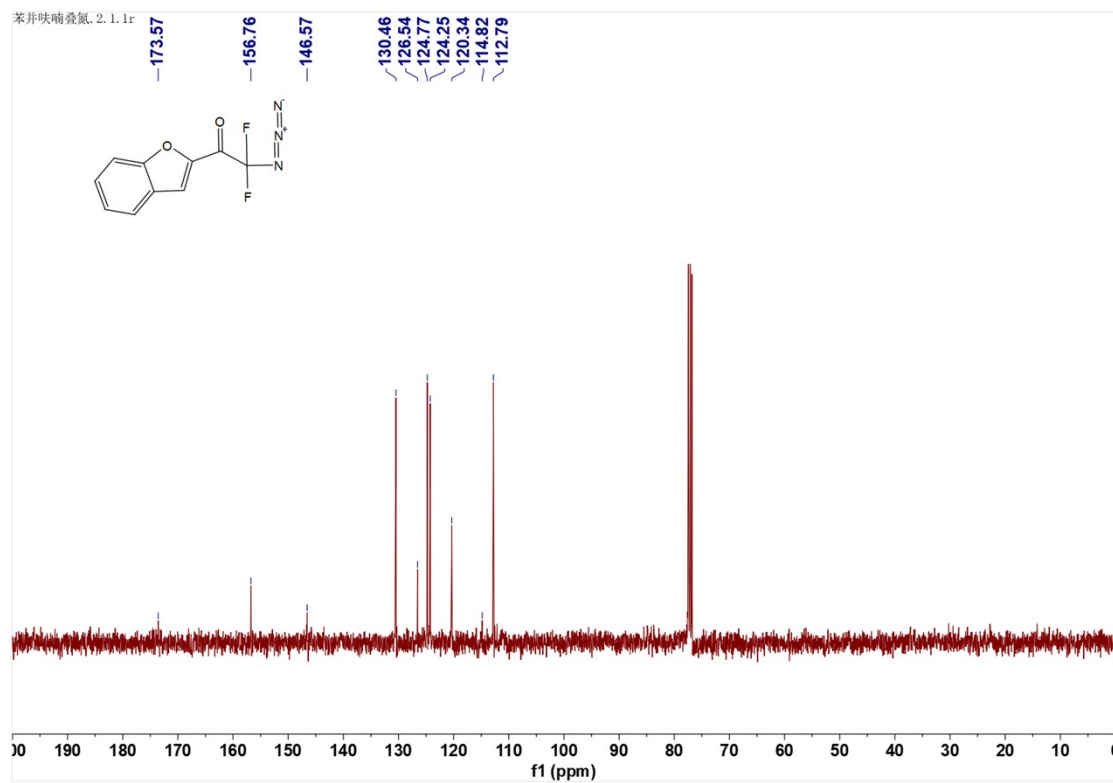

<sup>13</sup>C NMR spectra of 2p

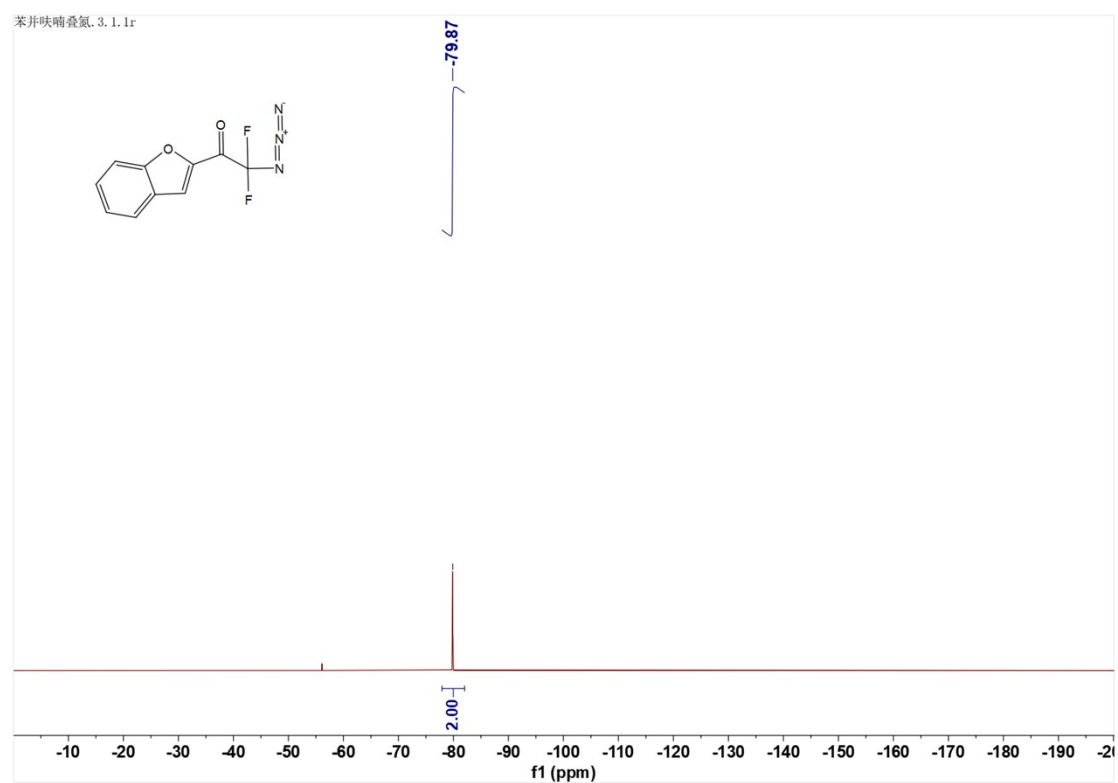

<sup>19</sup>F NMR spectra of 2p



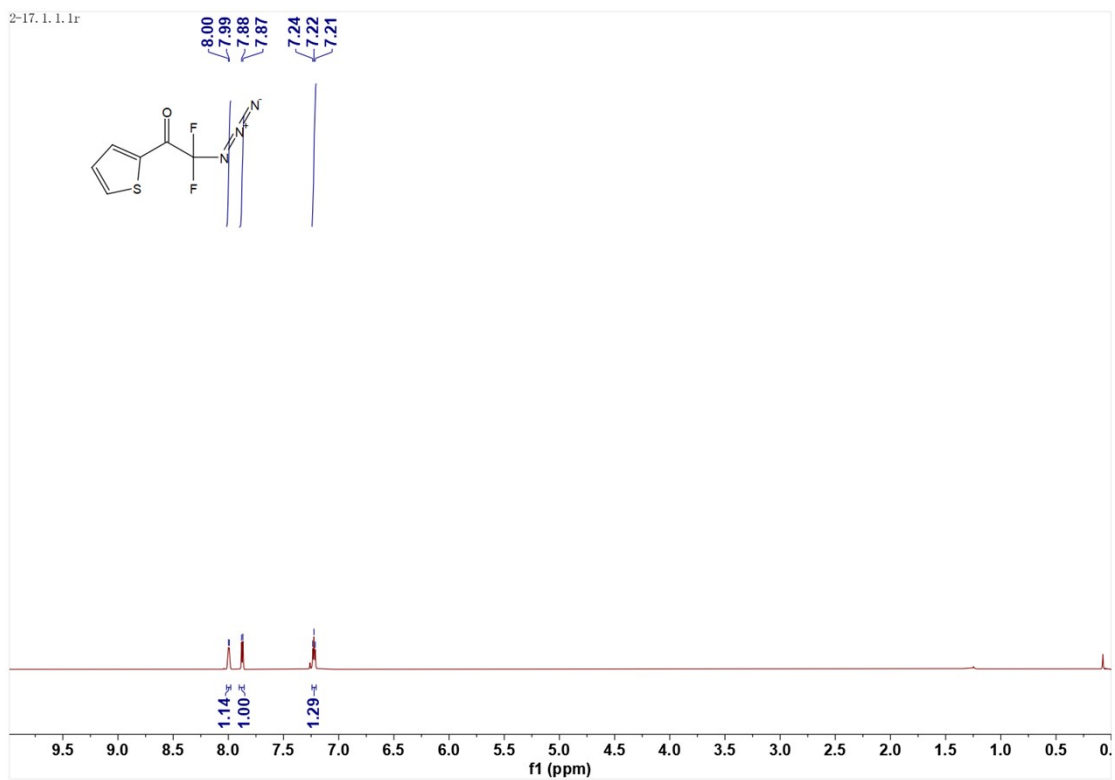

**<sup>1</sup>H NMR spectra of 2q**

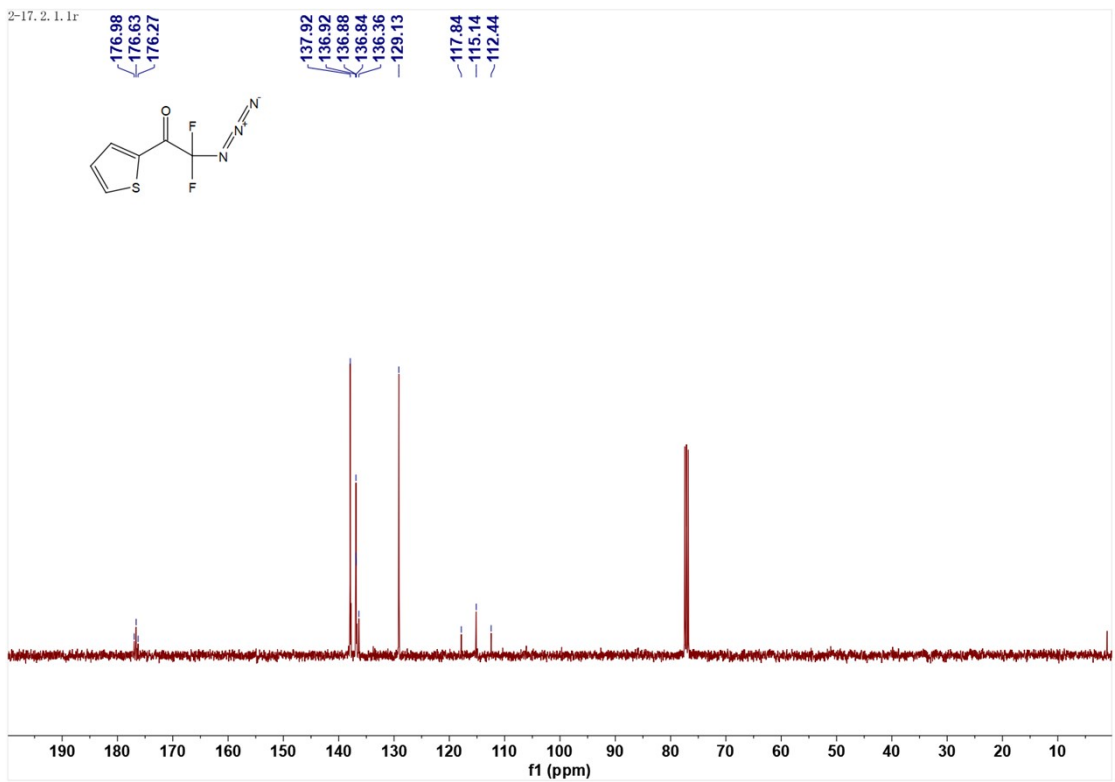

**<sup>13</sup>C NMR spectra of 2q**

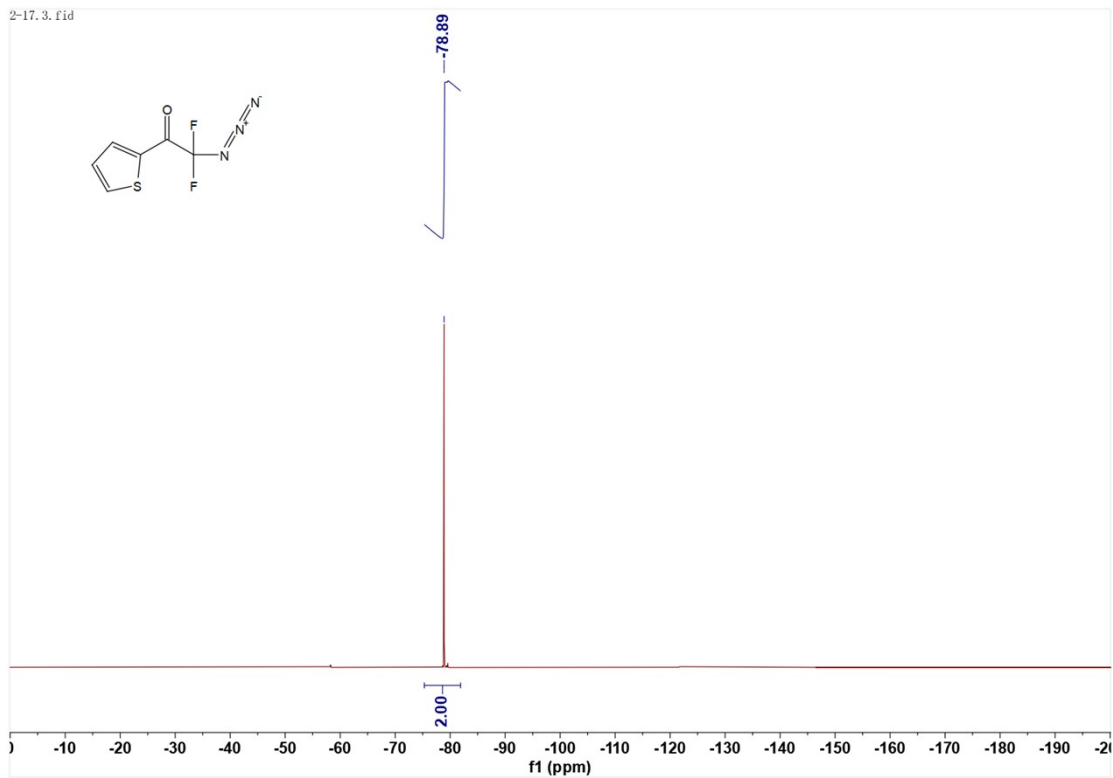

**<sup>19</sup>F NMR spectra of 2q**

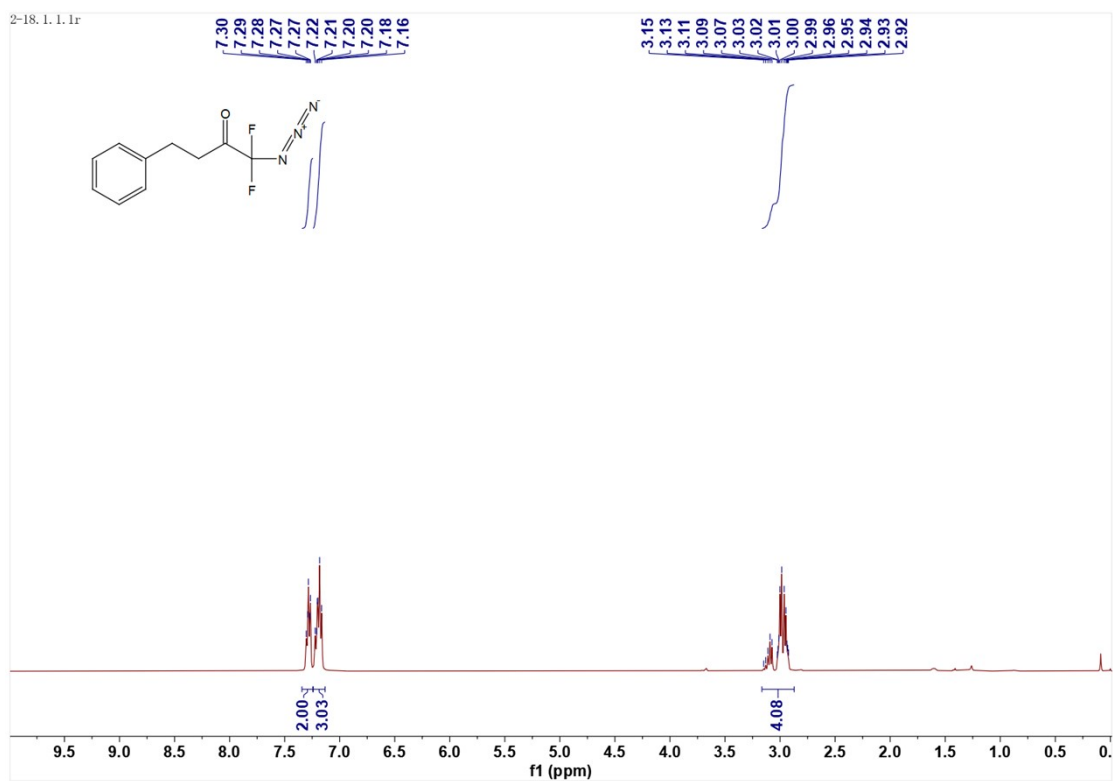

**<sup>1</sup>H NMR spectra of 2r**

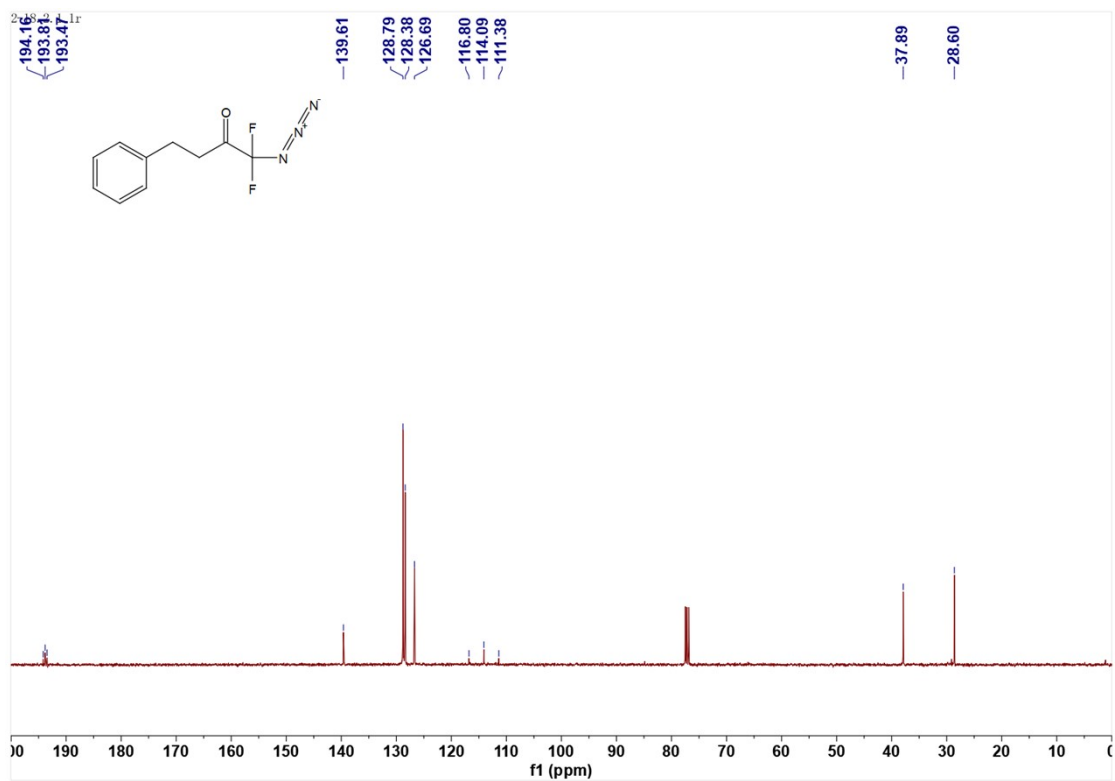

**<sup>13</sup>C NMR spectra of 2r**

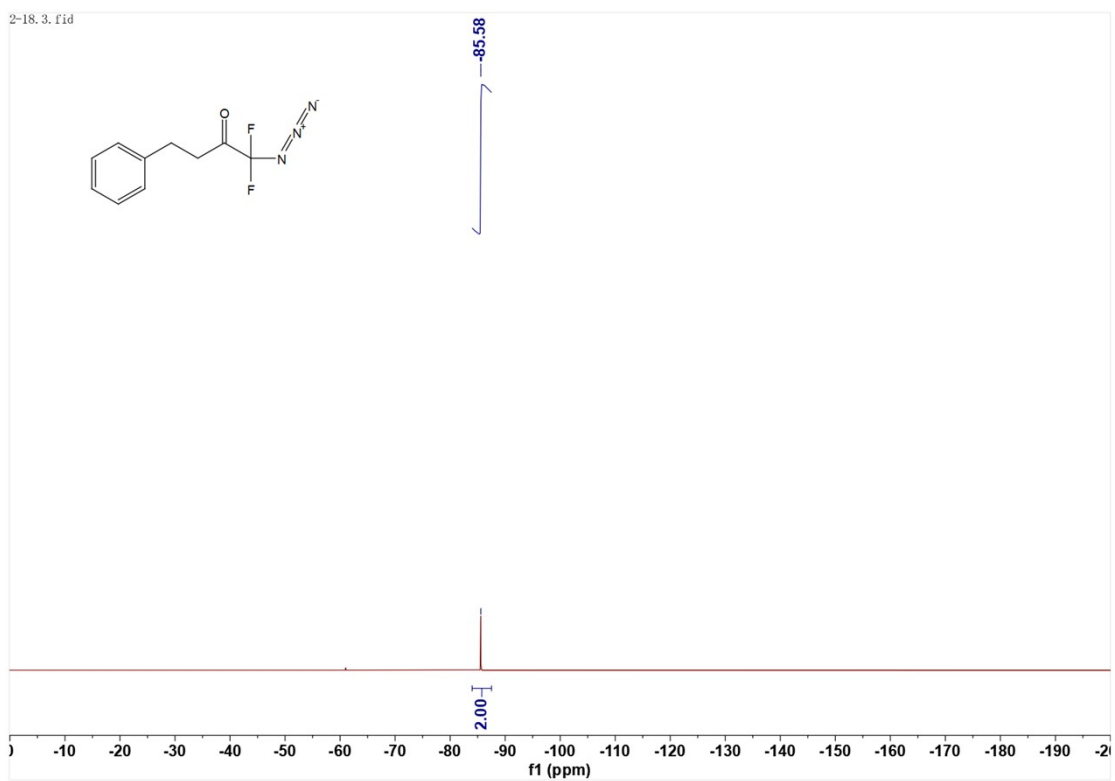

**<sup>19</sup>F NMR spectra of 2r**

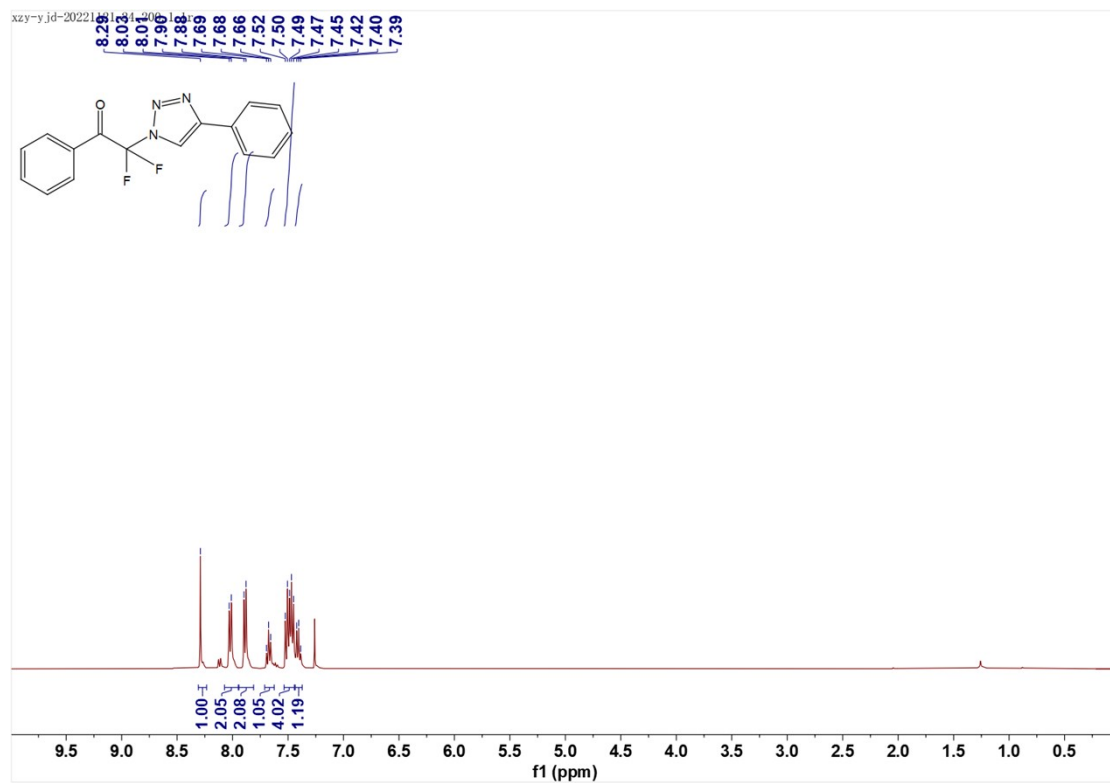

**<sup>1</sup>H NMR spectra of 4aa**

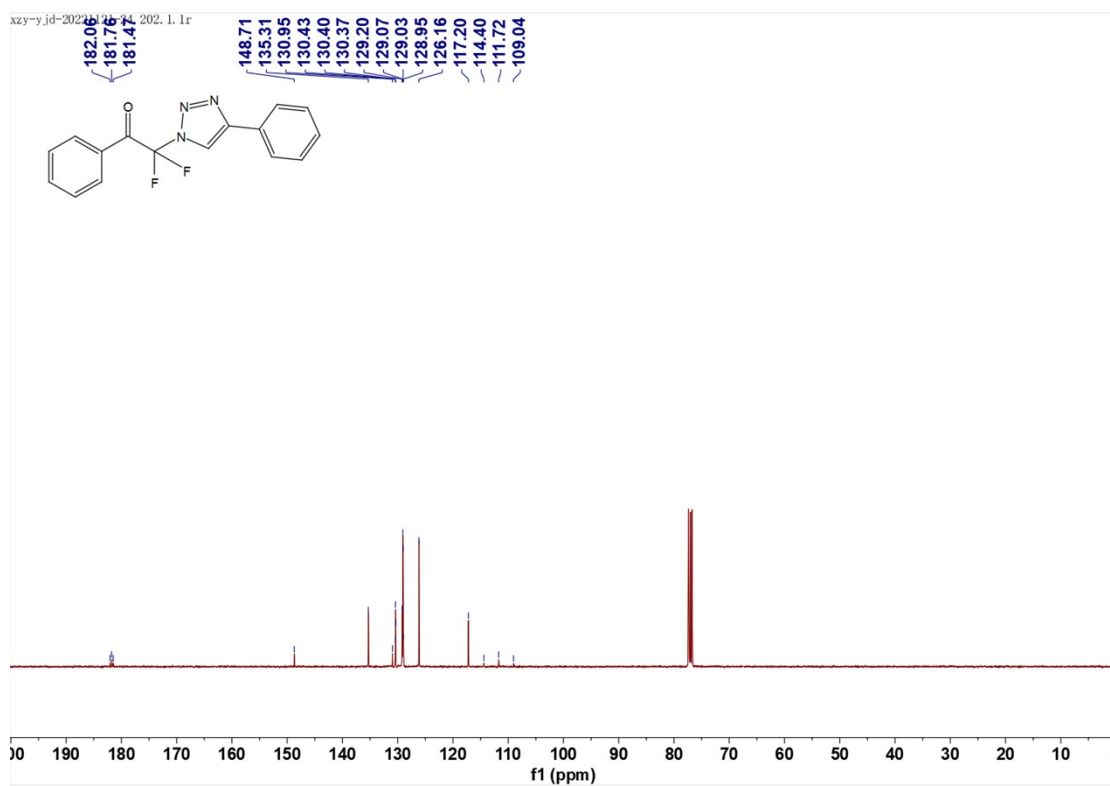

**<sup>13</sup>C NMR spectra of 4aa**

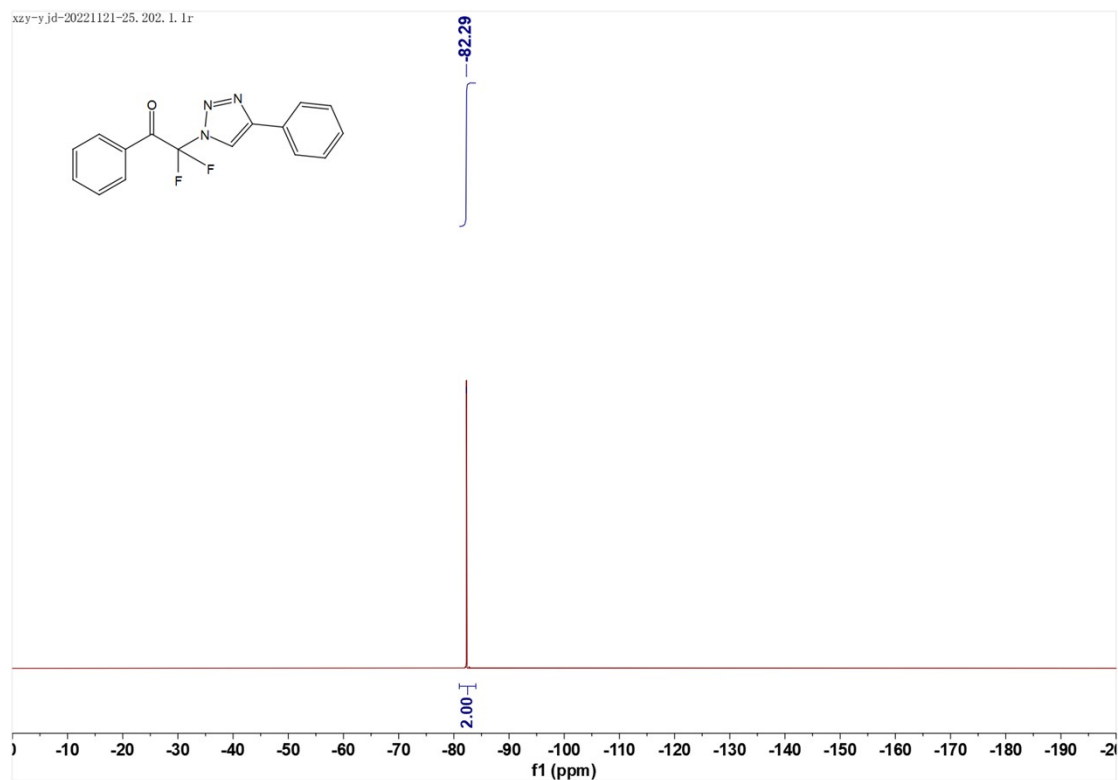

**<sup>19</sup>F NMR spectra of 4aa**

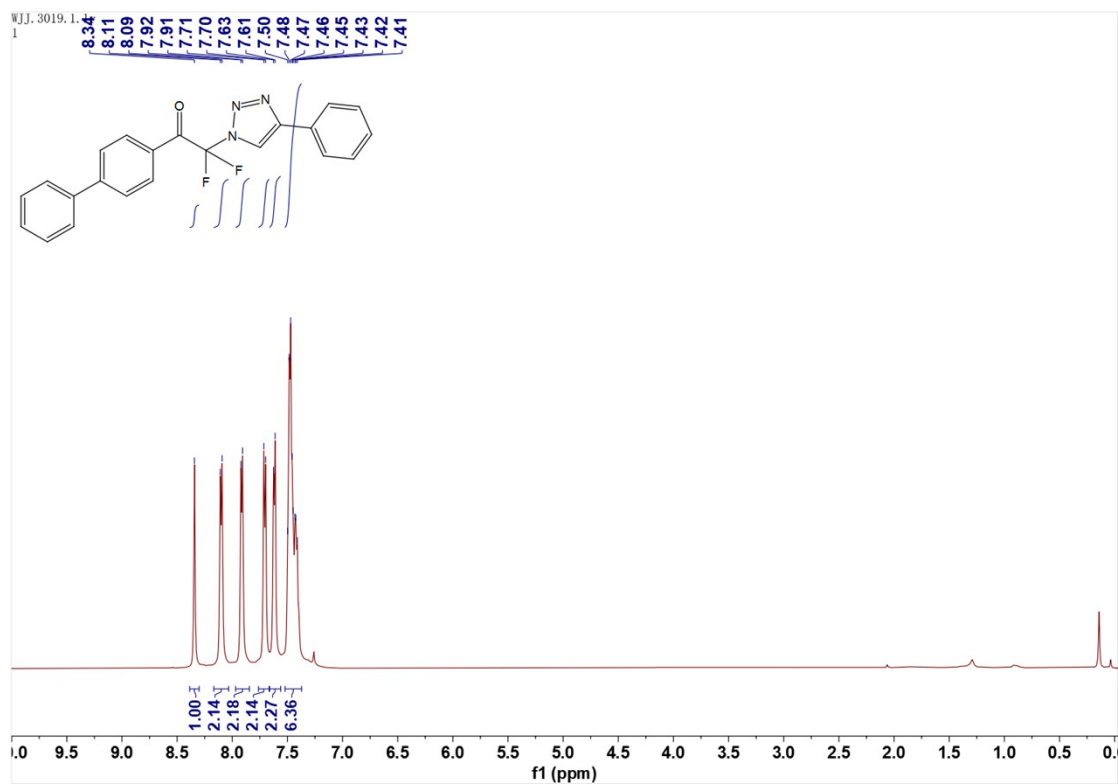

**<sup>1</sup>H NMR spectra of 4ba**

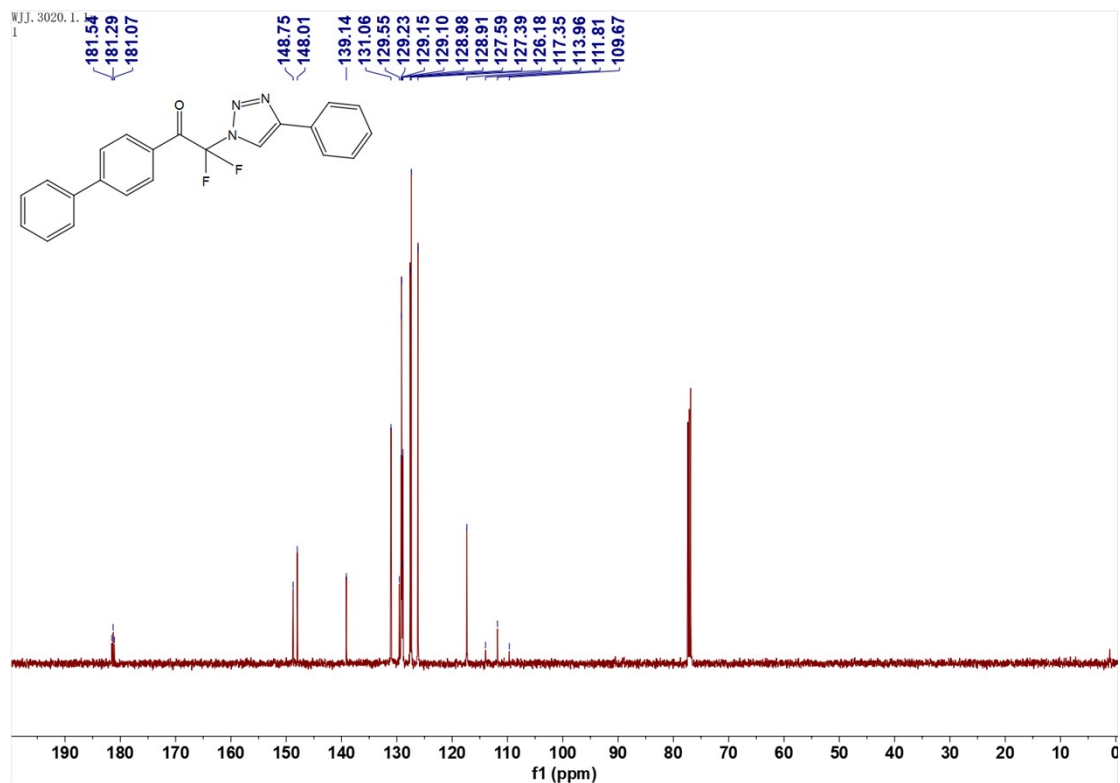

<sup>13</sup>C NMR spectra of 4ba

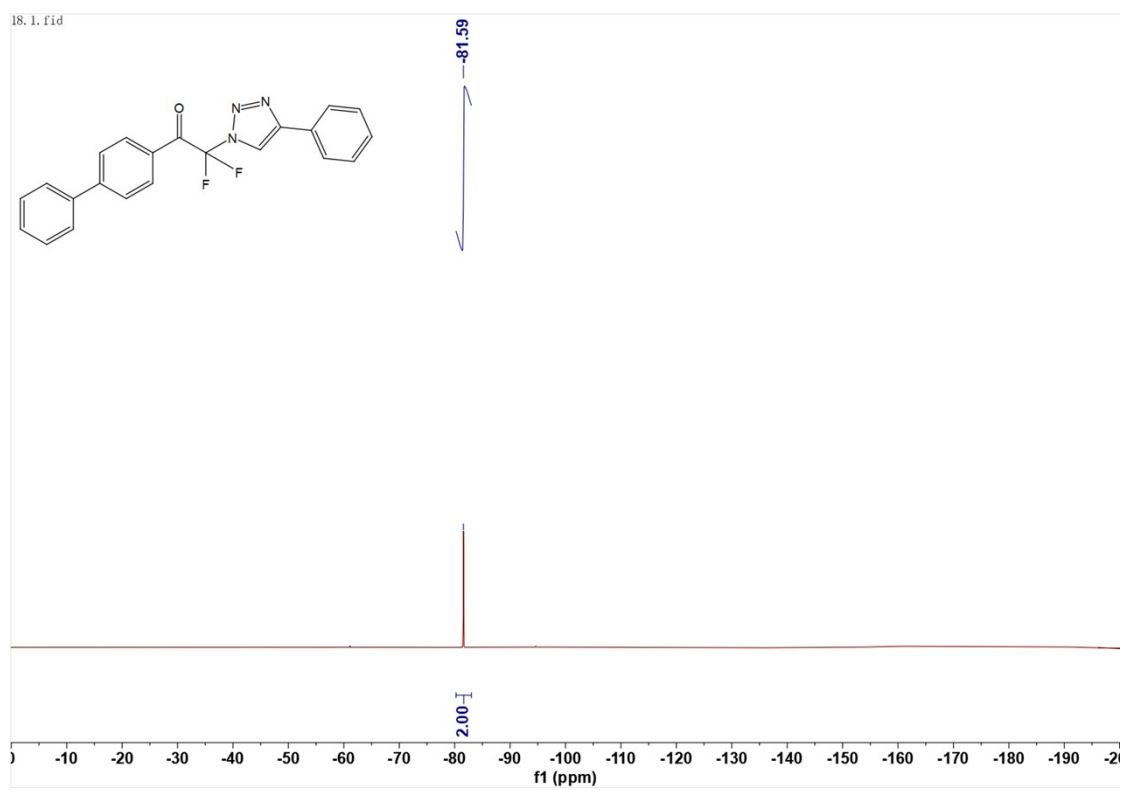

<sup>19</sup>F NMR spectra of 4ba

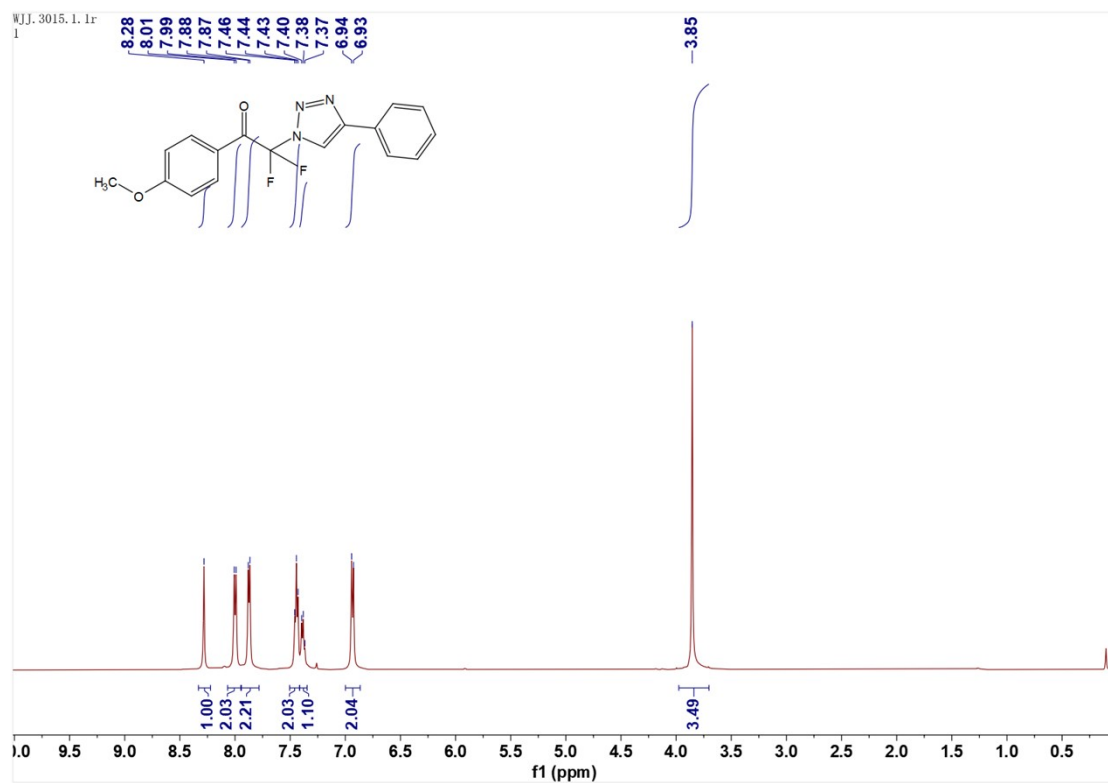

**<sup>1</sup>H NMR spectra of 4da**

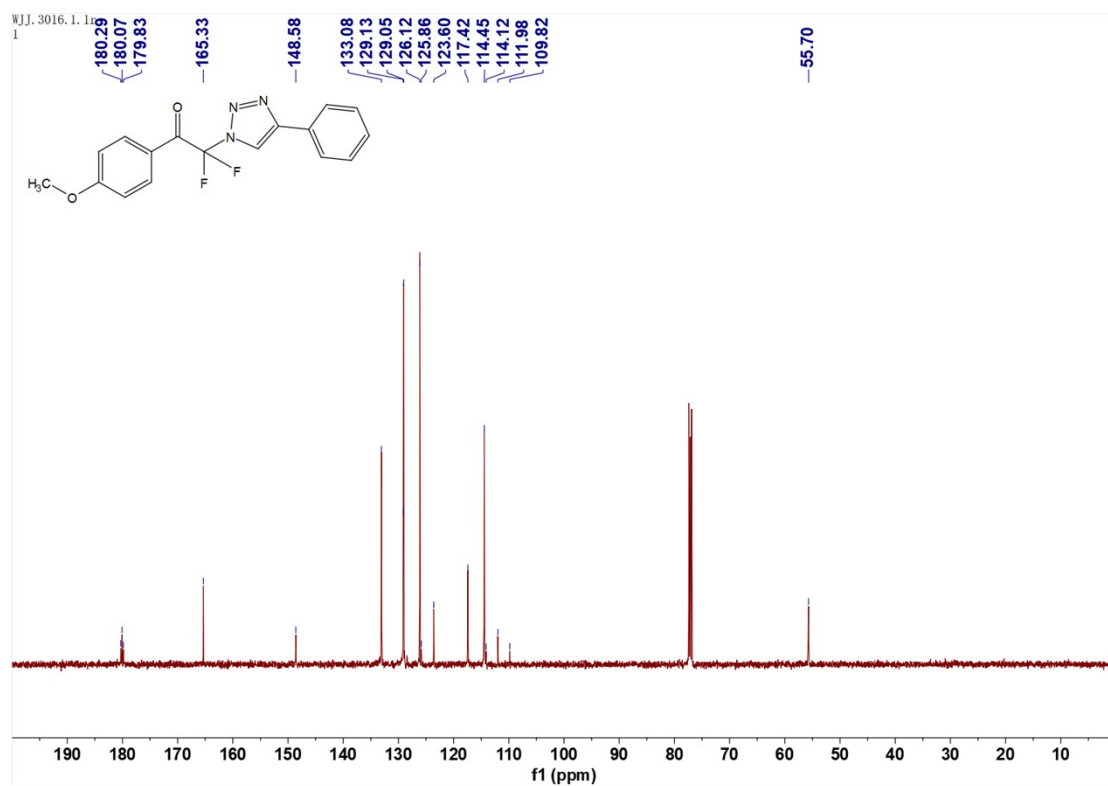

**<sup>13</sup>C NMR spectra of 4da**

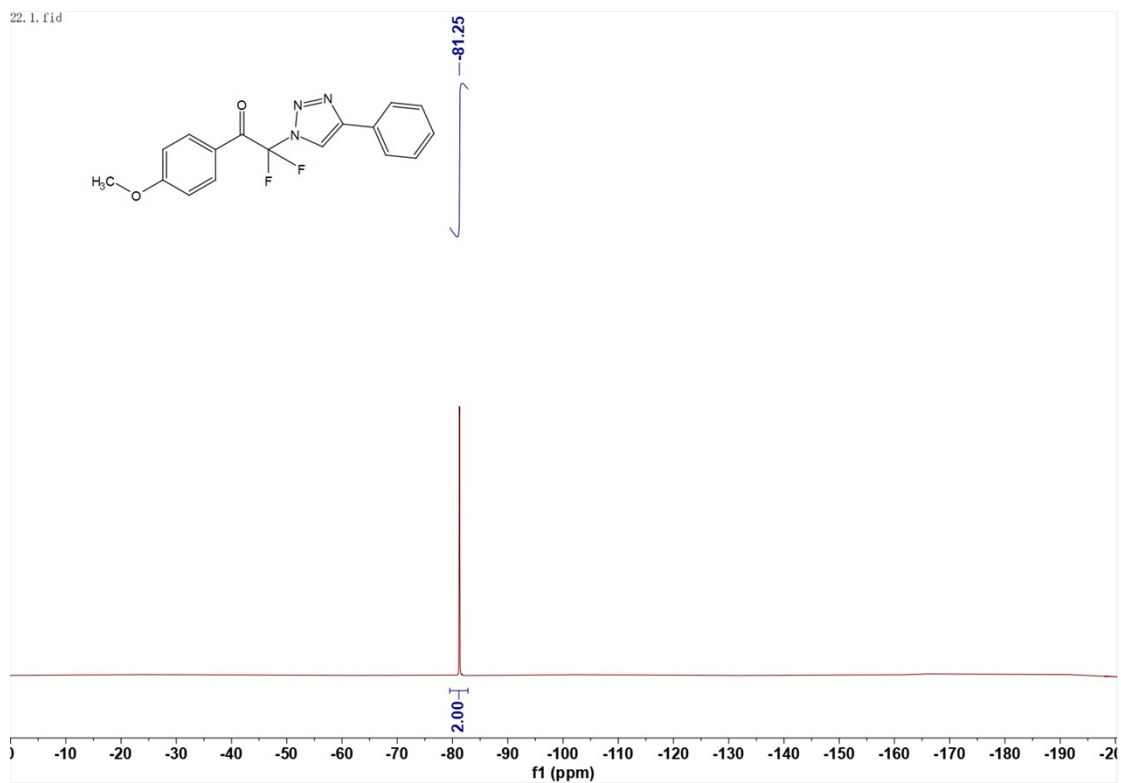

**<sup>19</sup>F NMR spectra of 4da**

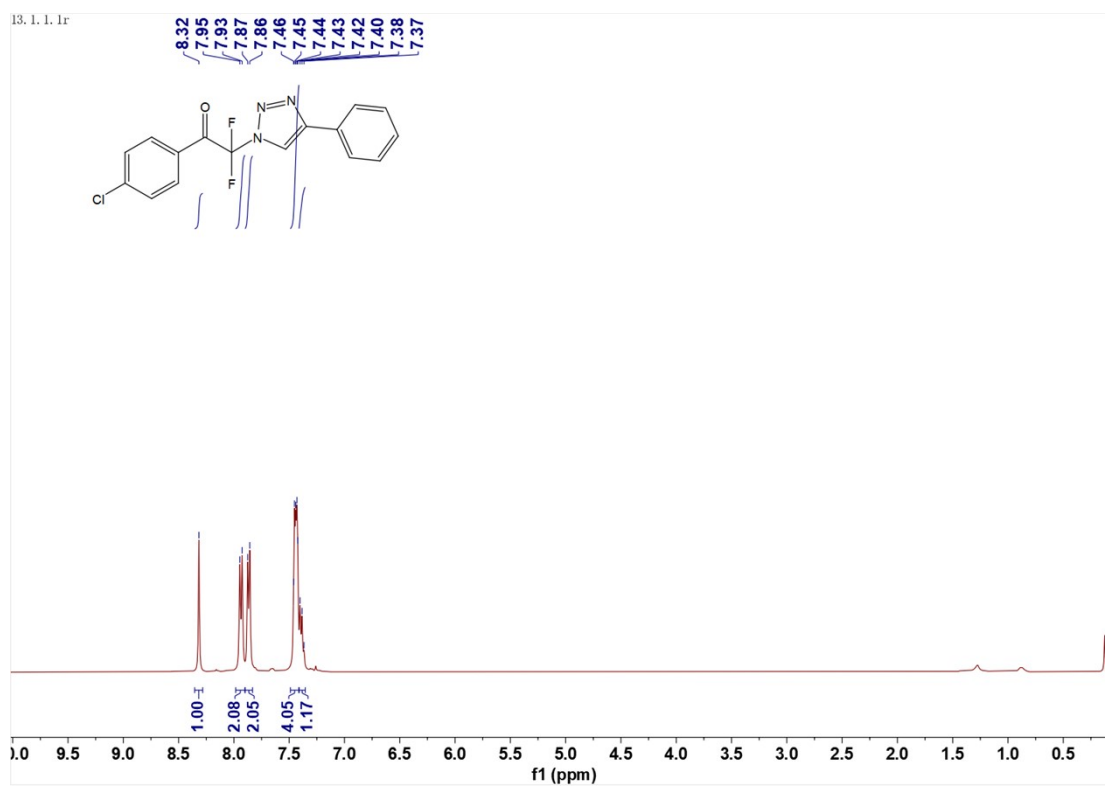

**<sup>1</sup>H NMR spectra of 4ea**



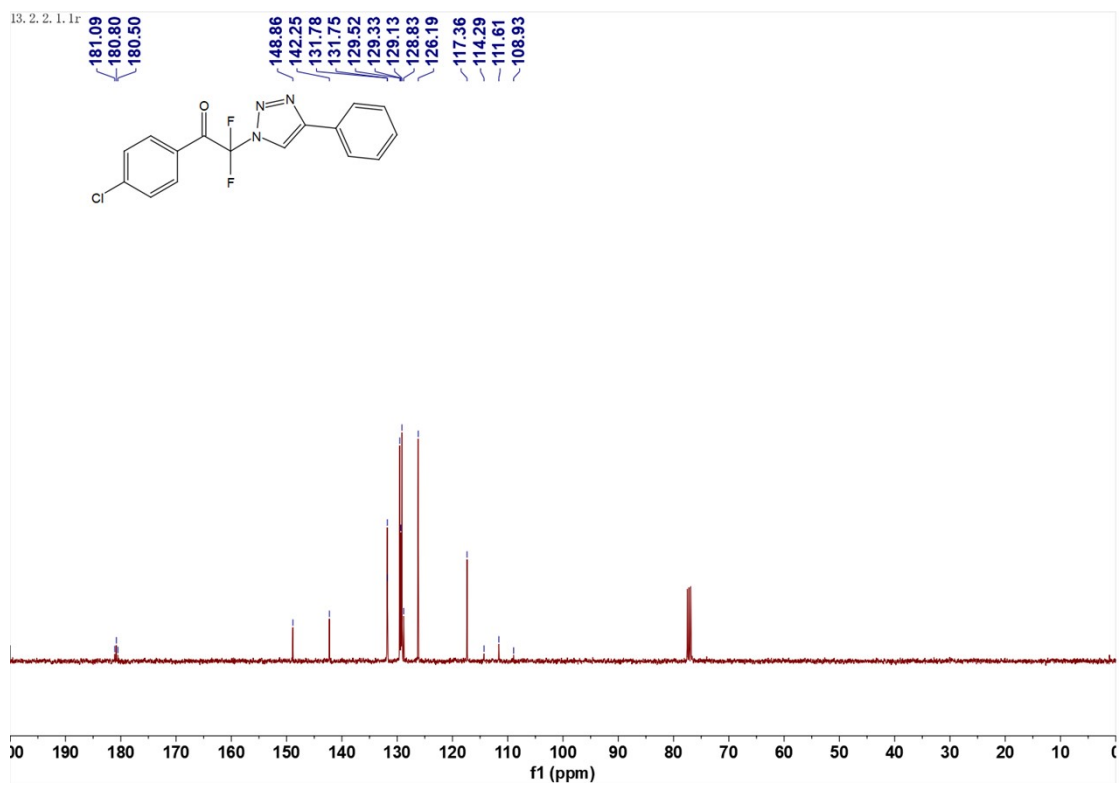

**<sup>13</sup>C NMR spectra of 4ea**

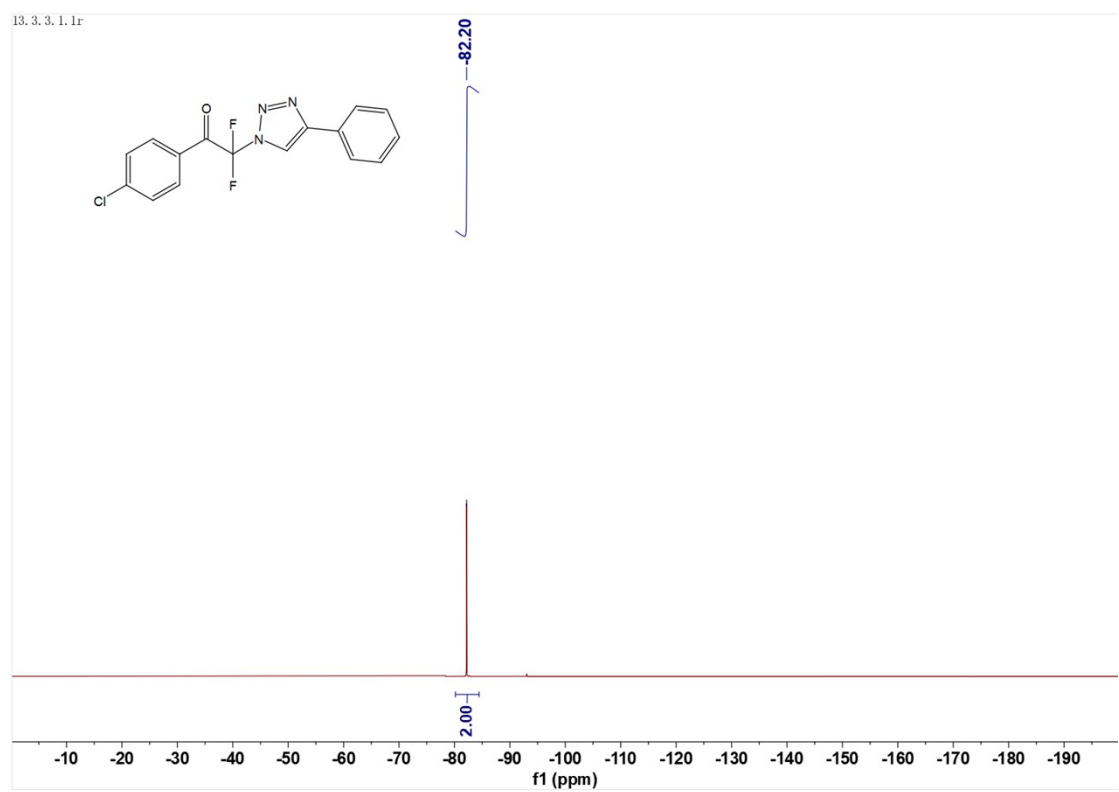

**<sup>19</sup>F NMR spectra of 4ea**

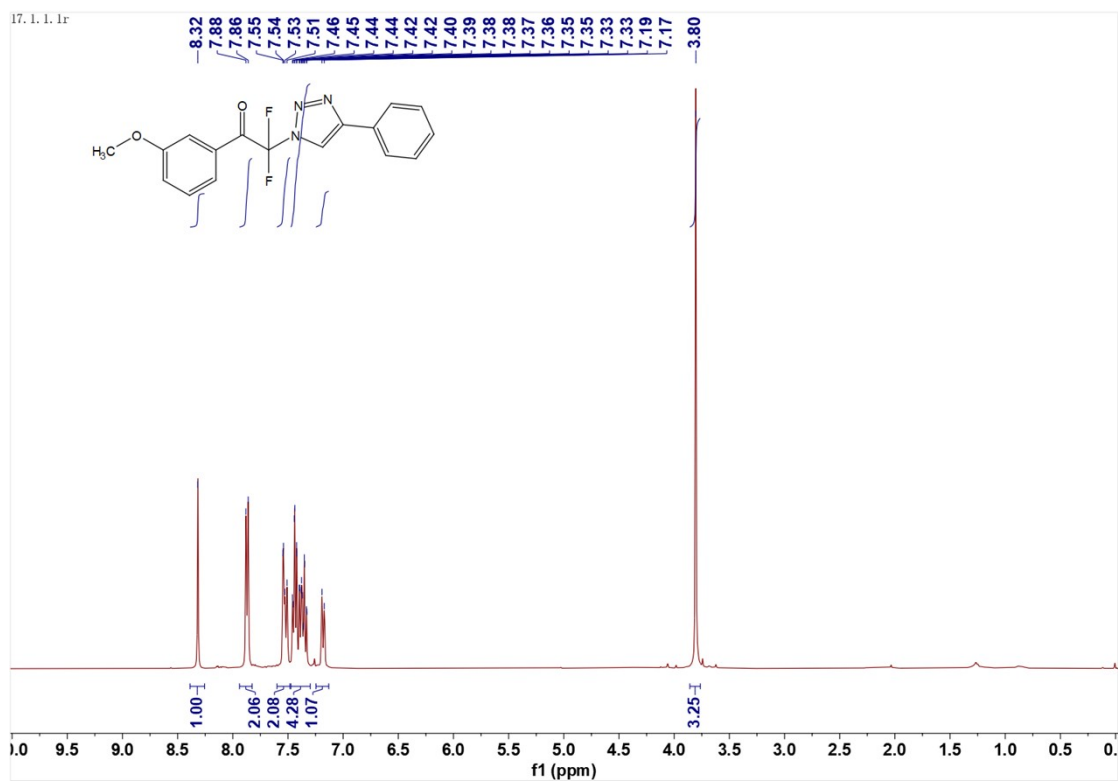

**<sup>1</sup>H NMR spectra of 4ga**

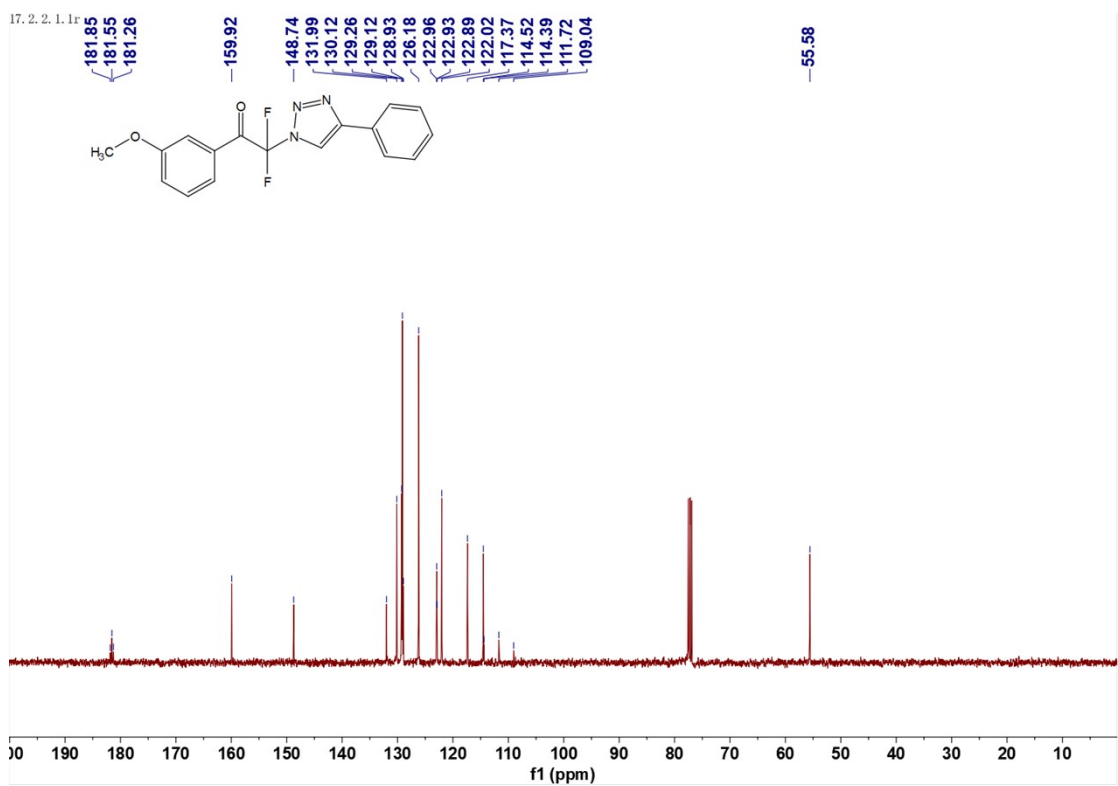

**<sup>13</sup>C NMR spectra of 4ga**

17. 3. 3. 1. 1r

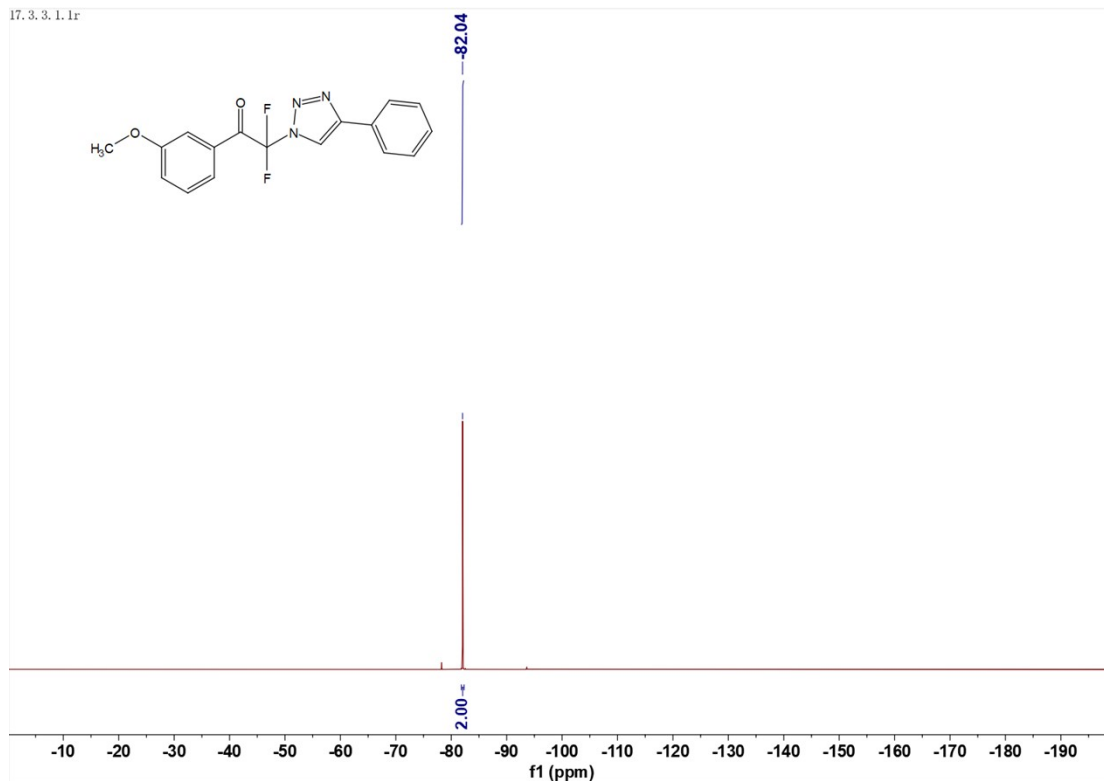

$^{19}\text{F}$  NMR spectra of 4ga

16. 1. 1. 1r

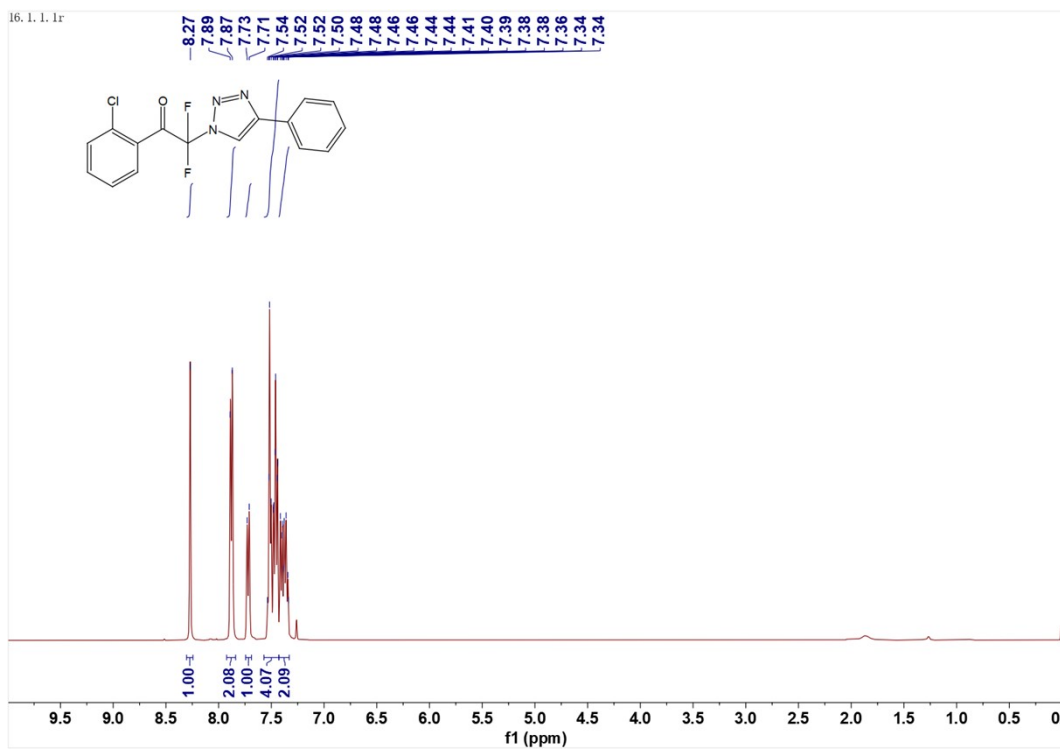

$^1\text{H}$  NMR spectra of 4ia

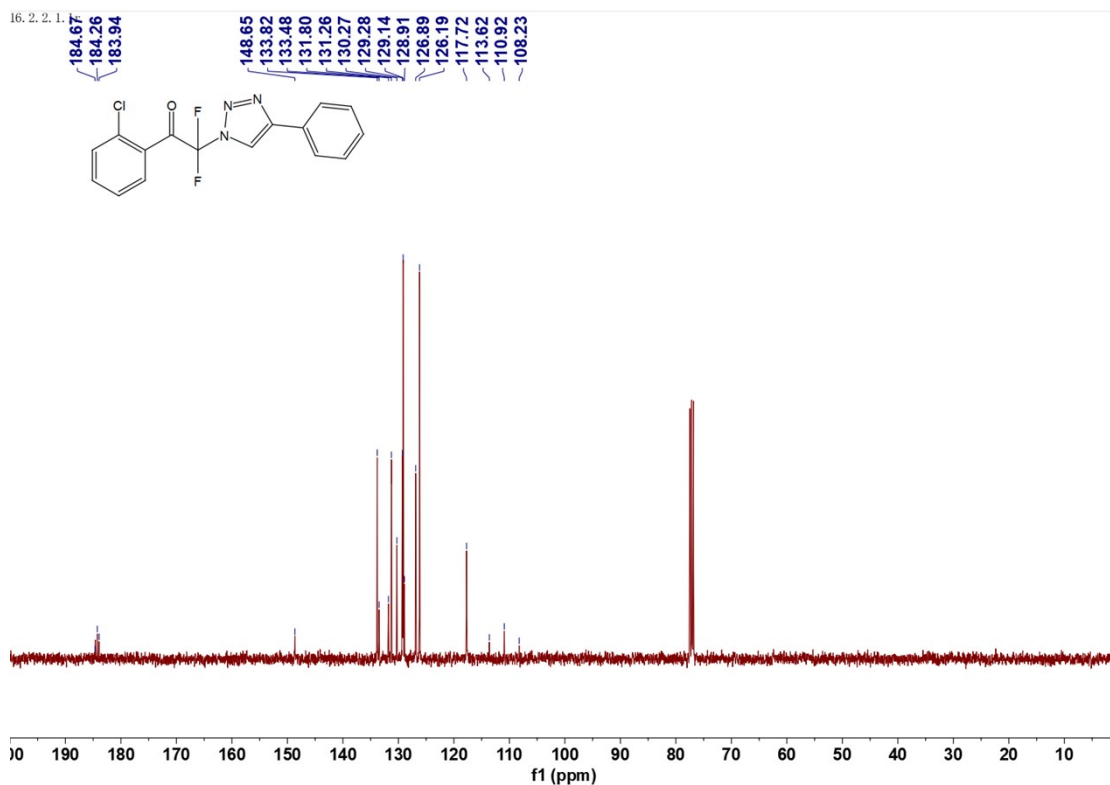

**<sup>13</sup>C NMR spectra of 4ia**

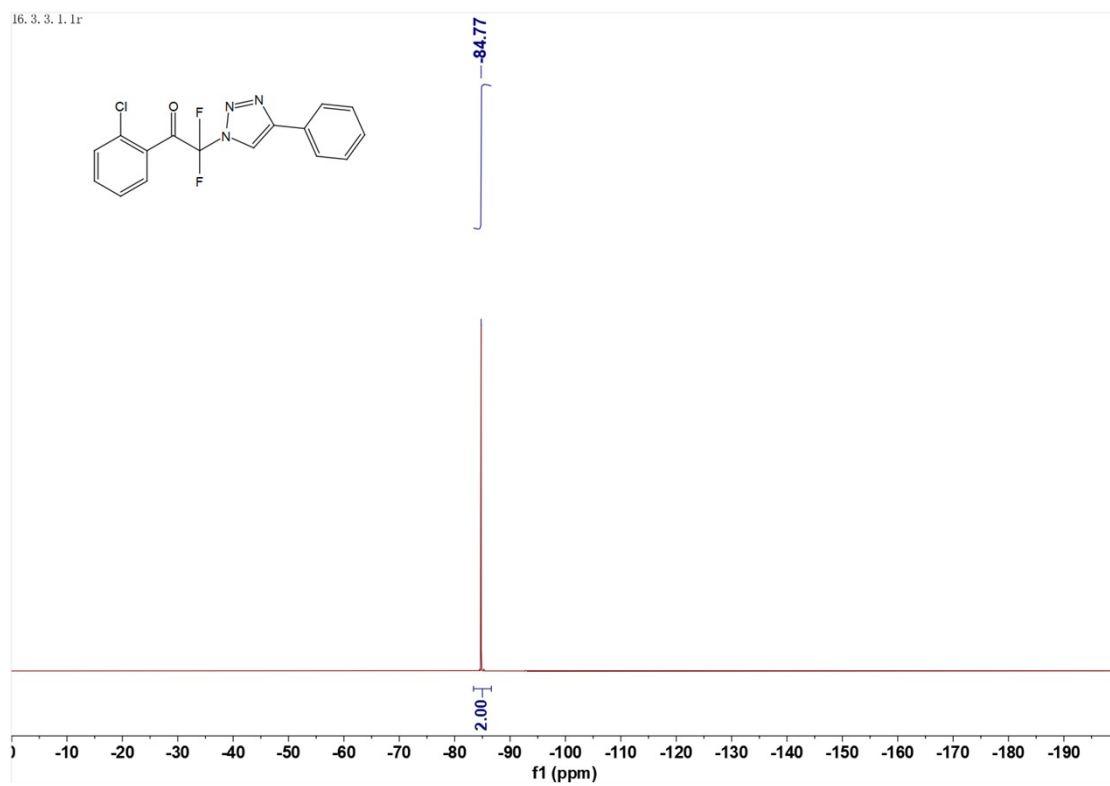

**<sup>19</sup>F NMR spectra of 4ia**

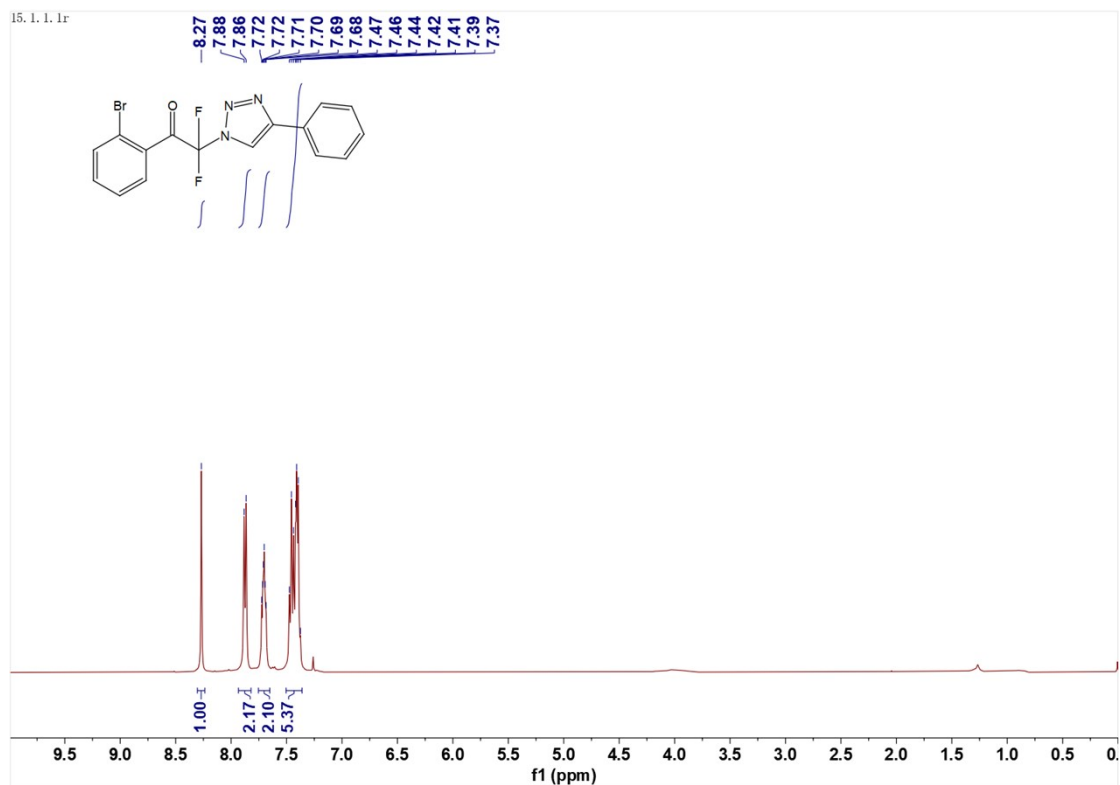

<sup>1</sup>H NMR spectra of 4ja

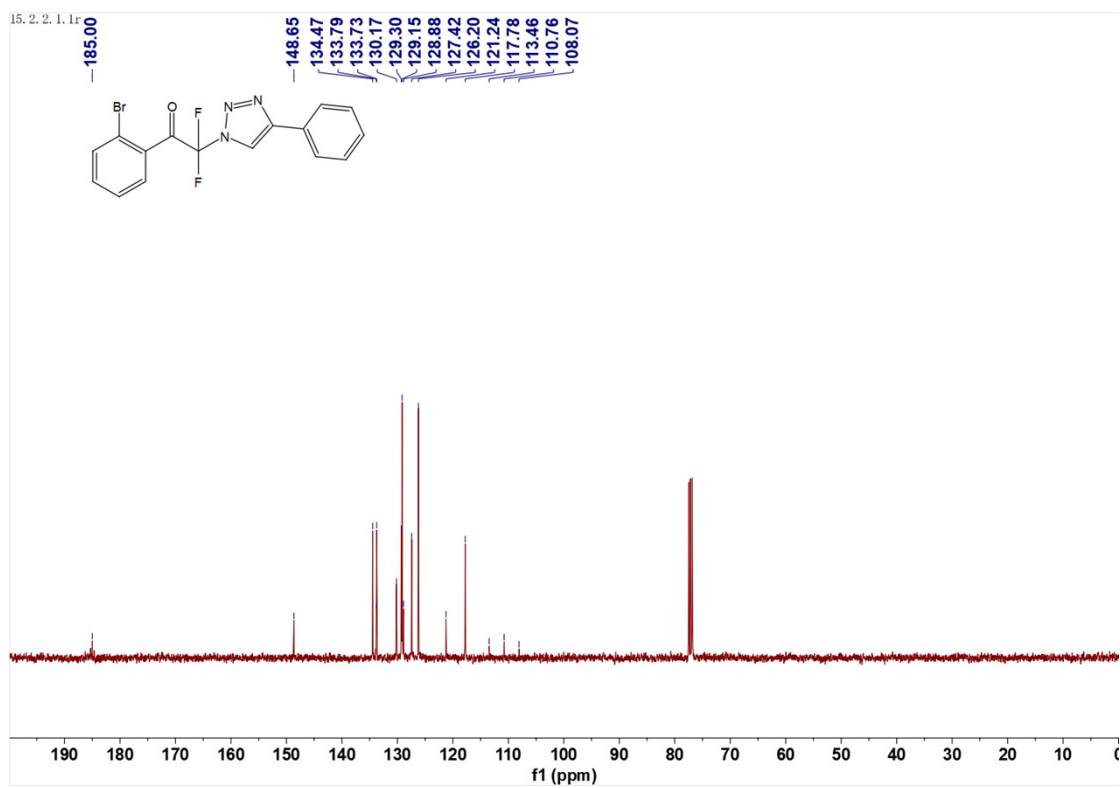

<sup>13</sup>C NMR spectra of 4ja

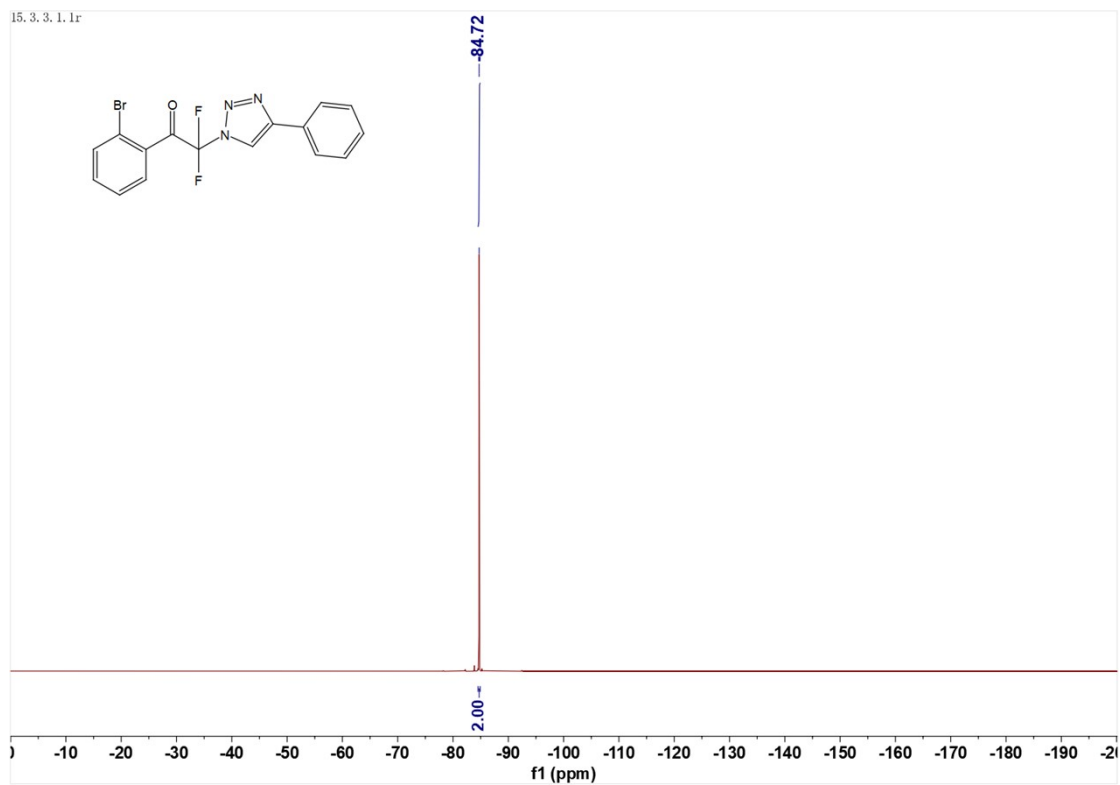

**<sup>19</sup>F NMR spectra of 4ja**

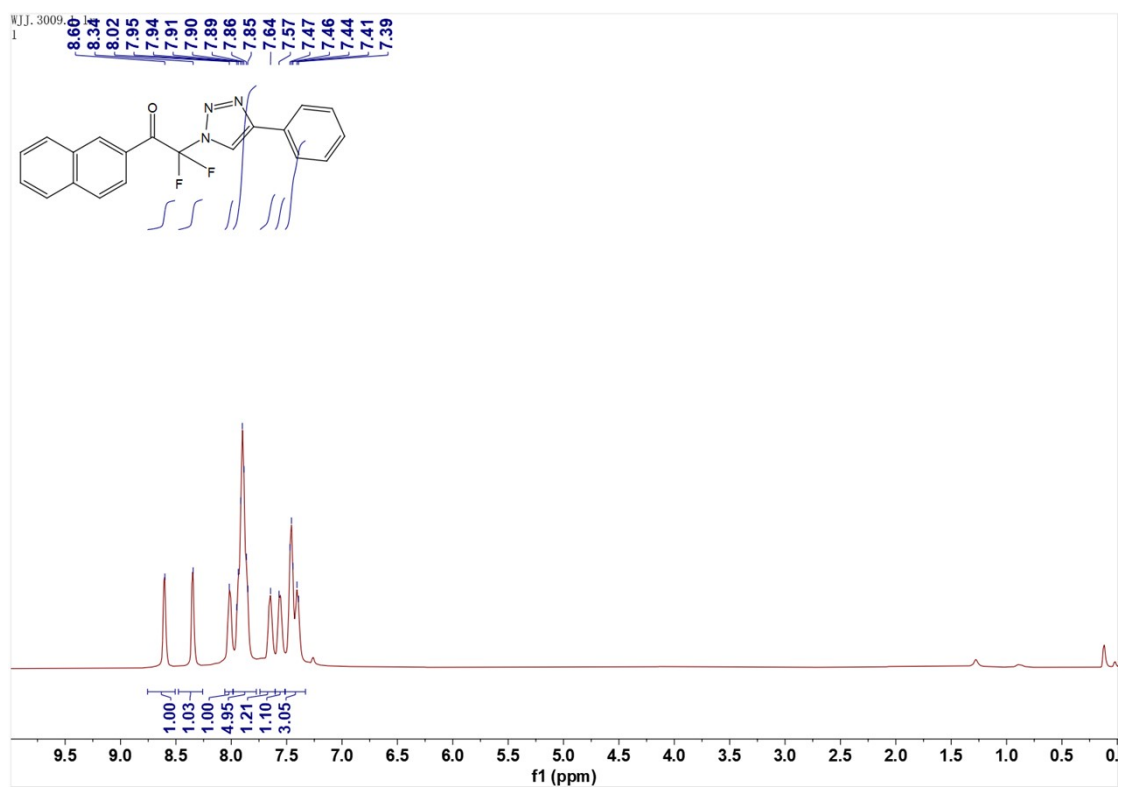

**<sup>1</sup>H NMR spectra of 4la**

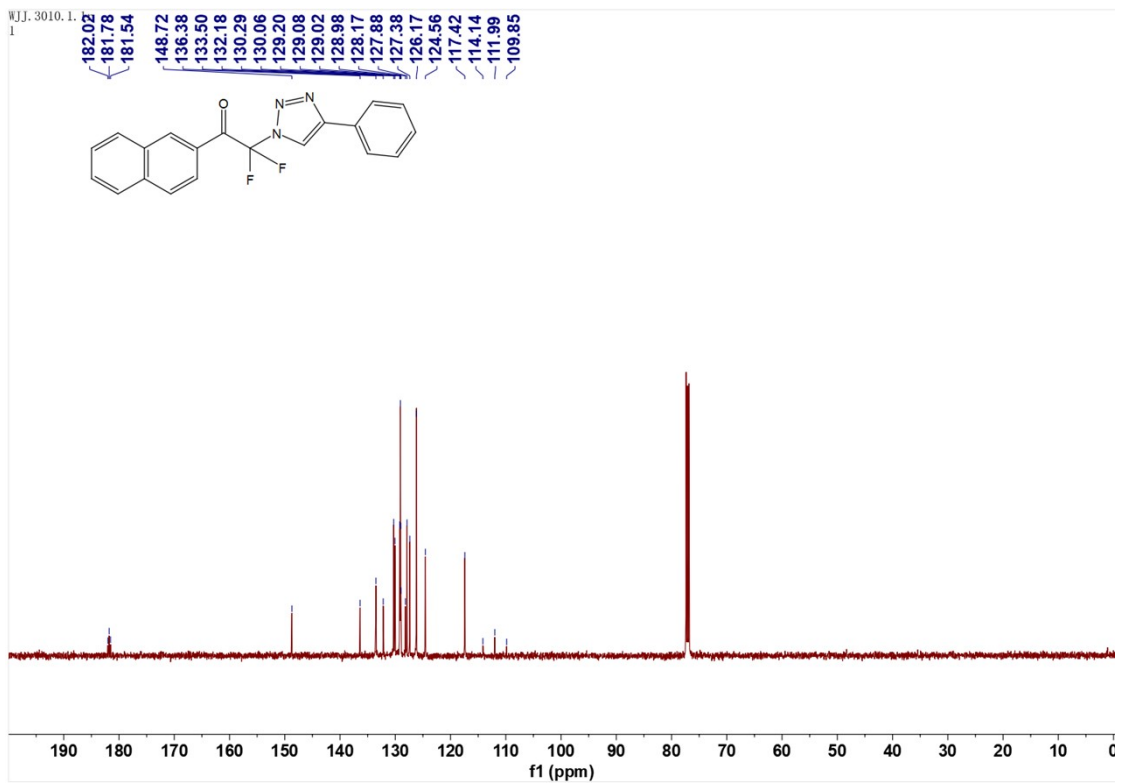

**<sup>13</sup>C NMR spectra of 4la**

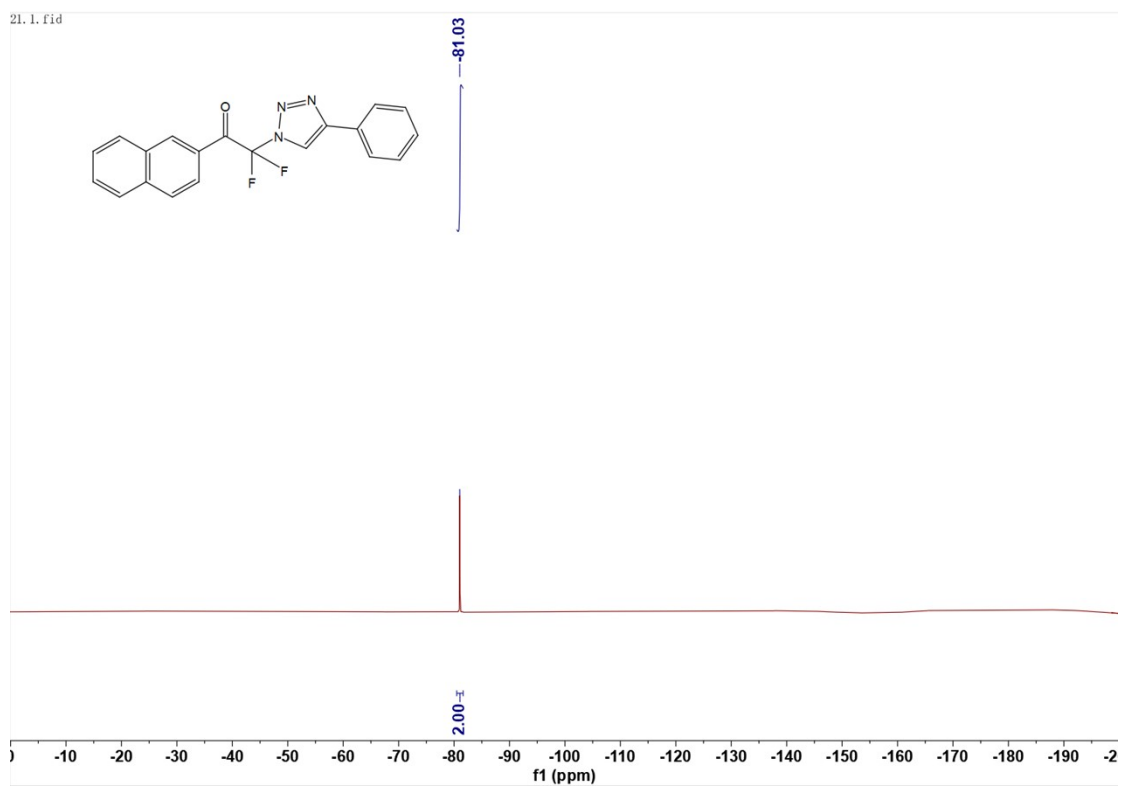

**<sup>19</sup>F NMR spectra of 4la**

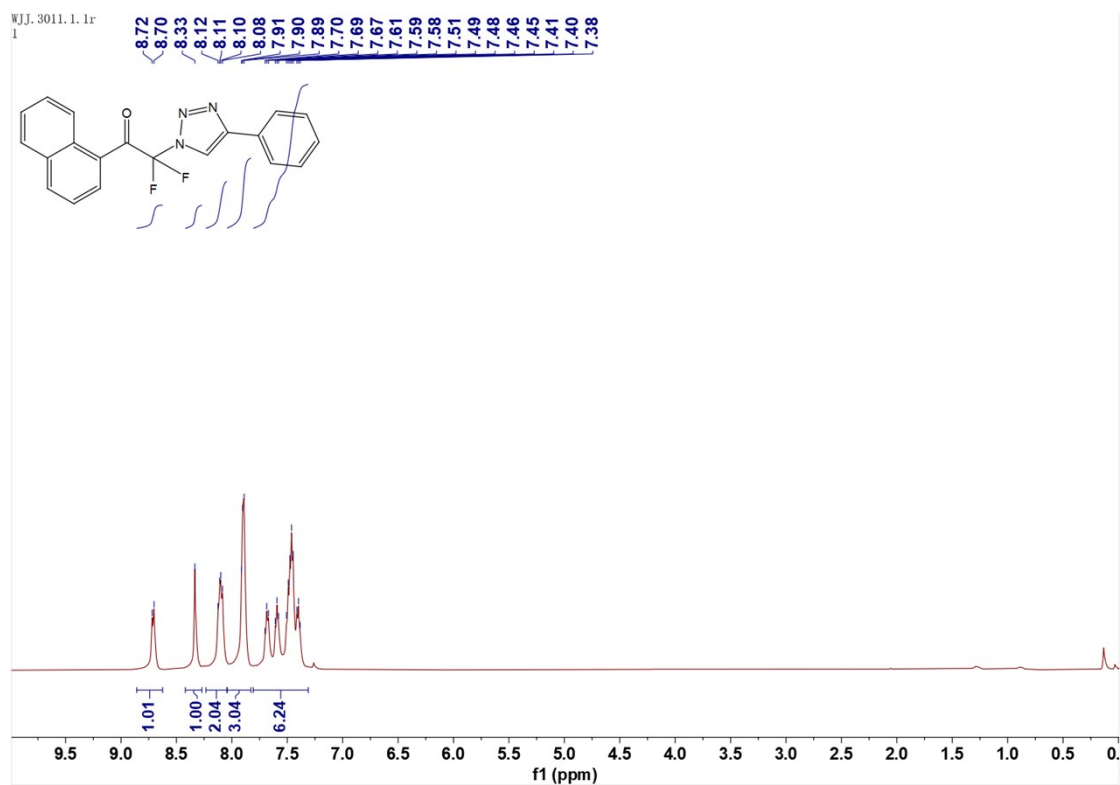

**<sup>1</sup>H NMR spectra of 4ma**

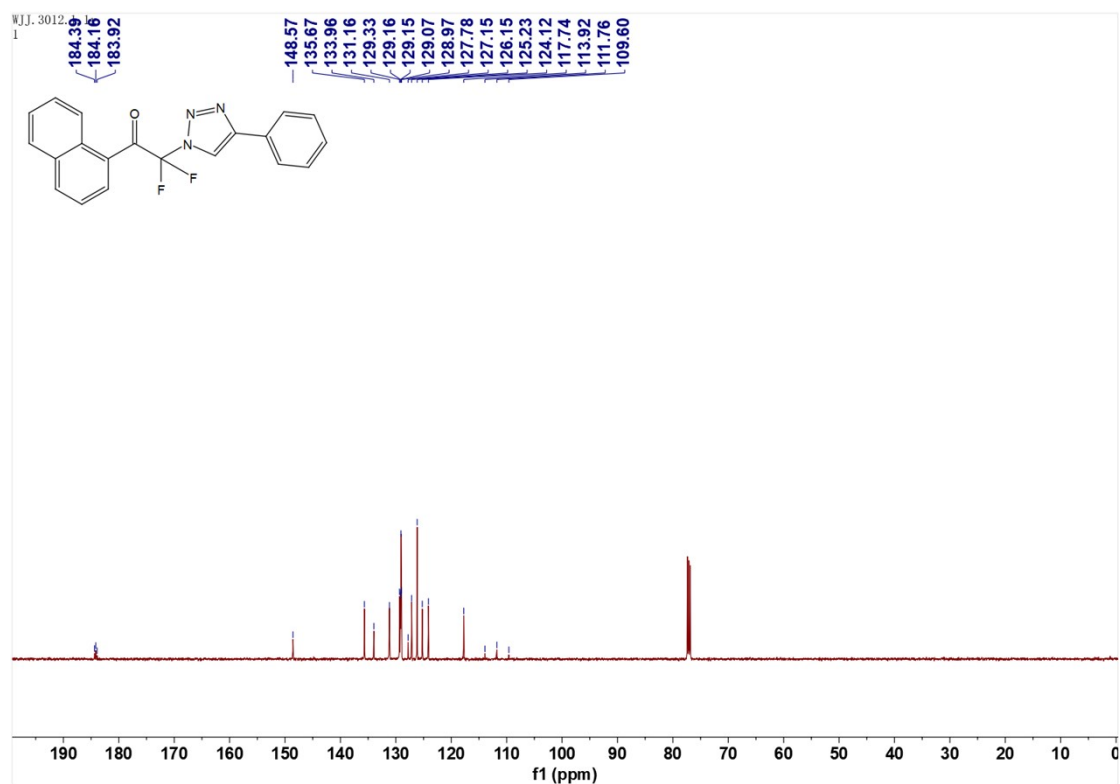

**<sup>13</sup>C NMR spectra of 4ma**



23. 1. fid

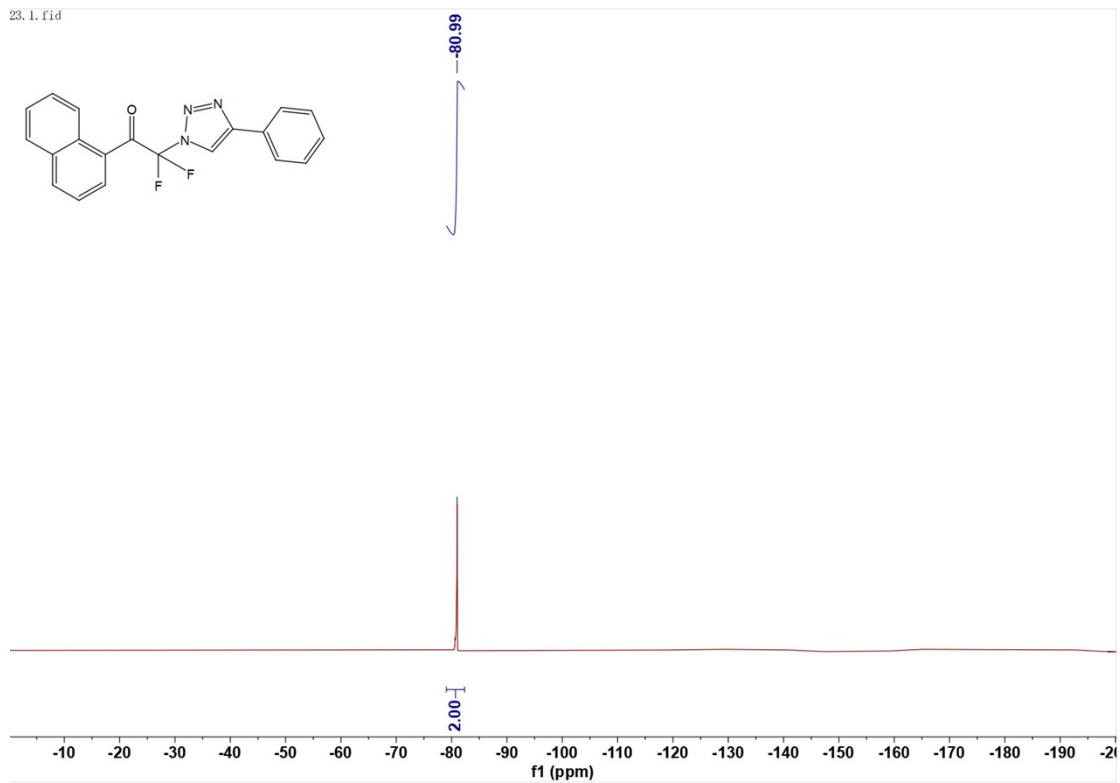

<sup>19</sup>F NMR spectra of 4ma

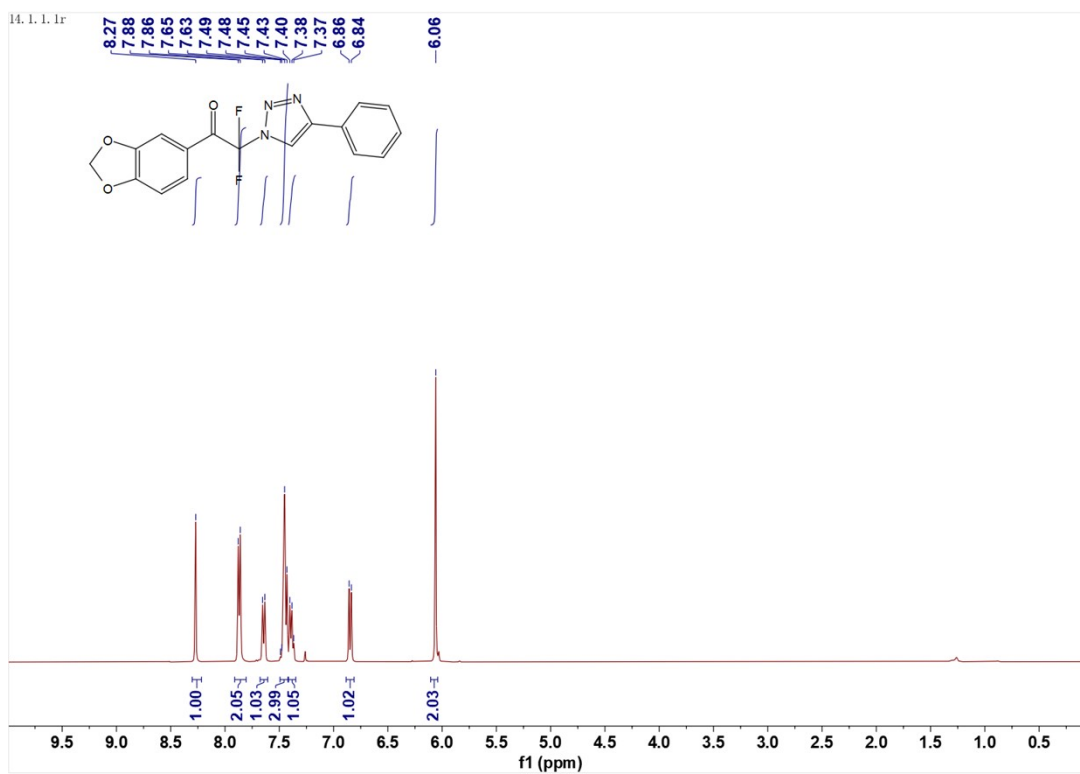

<sup>1</sup>H NMR spectra of 4na

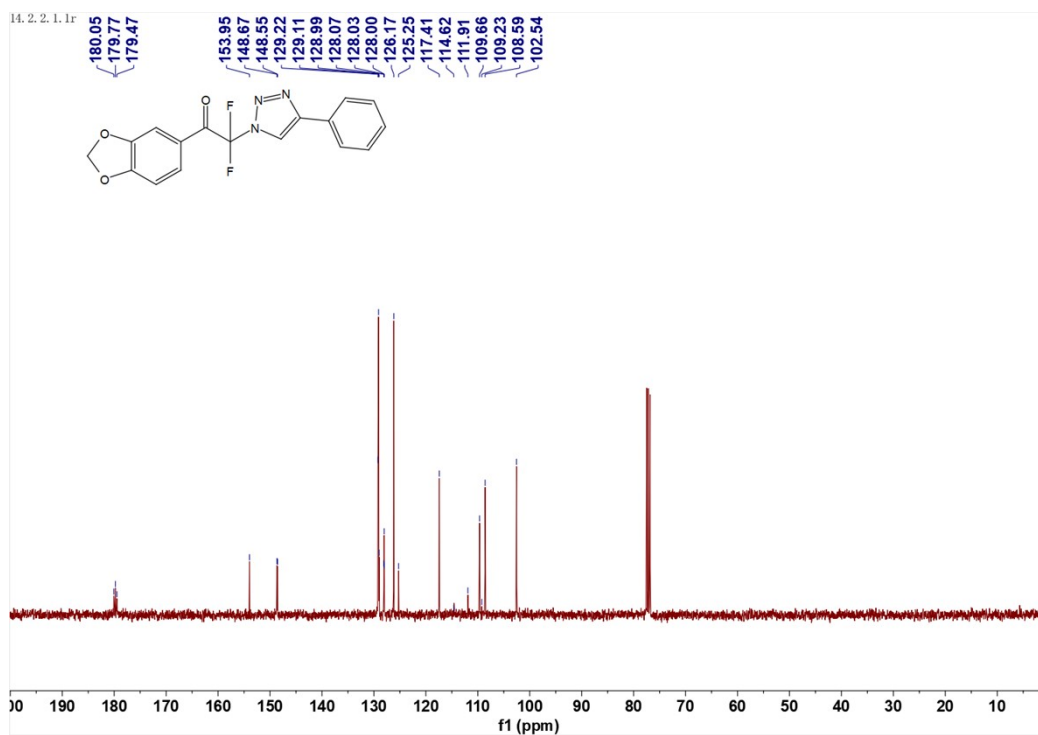

**<sup>13</sup>C NMR spectra of 4na**

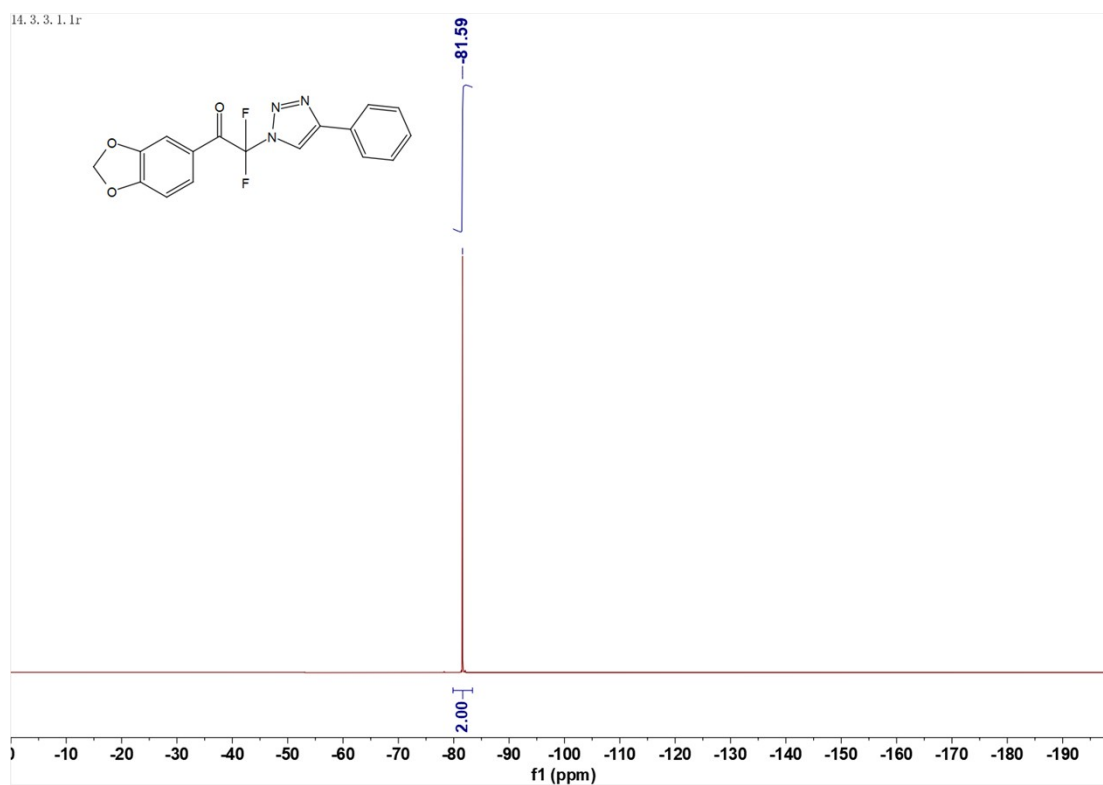

**<sup>19</sup>F NMR spectra of 4na**

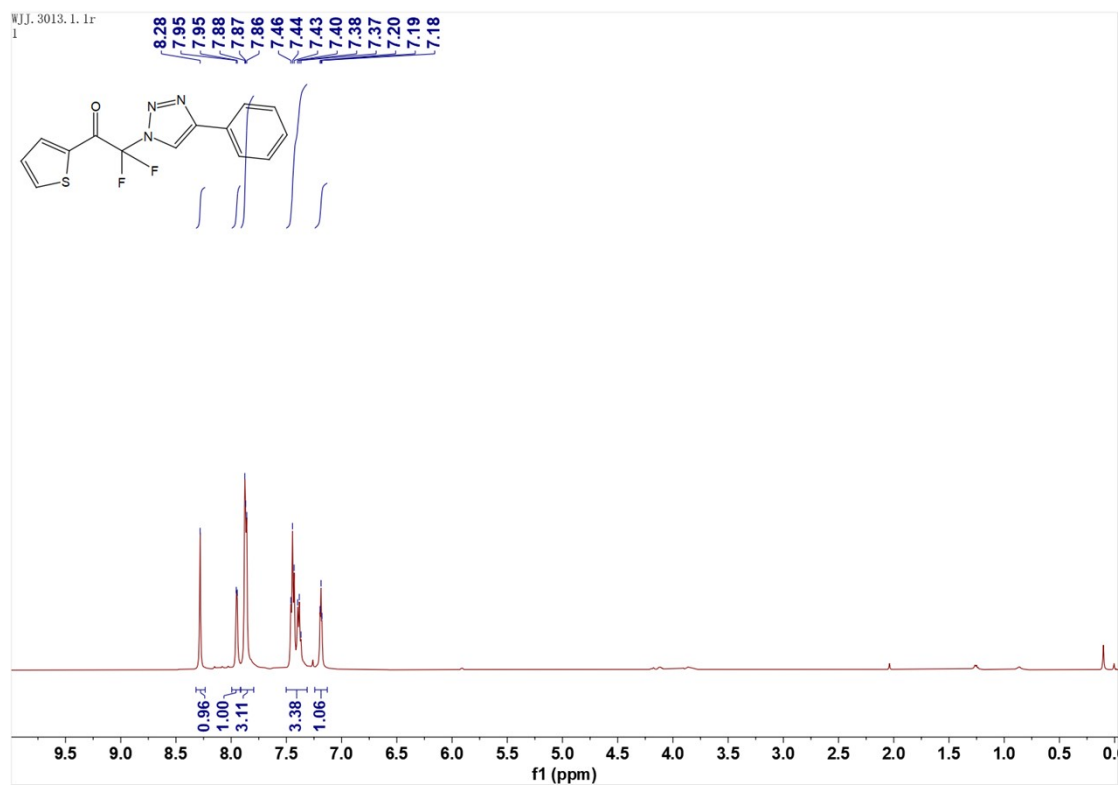

**<sup>1</sup>H NMR spectra of 4qa**

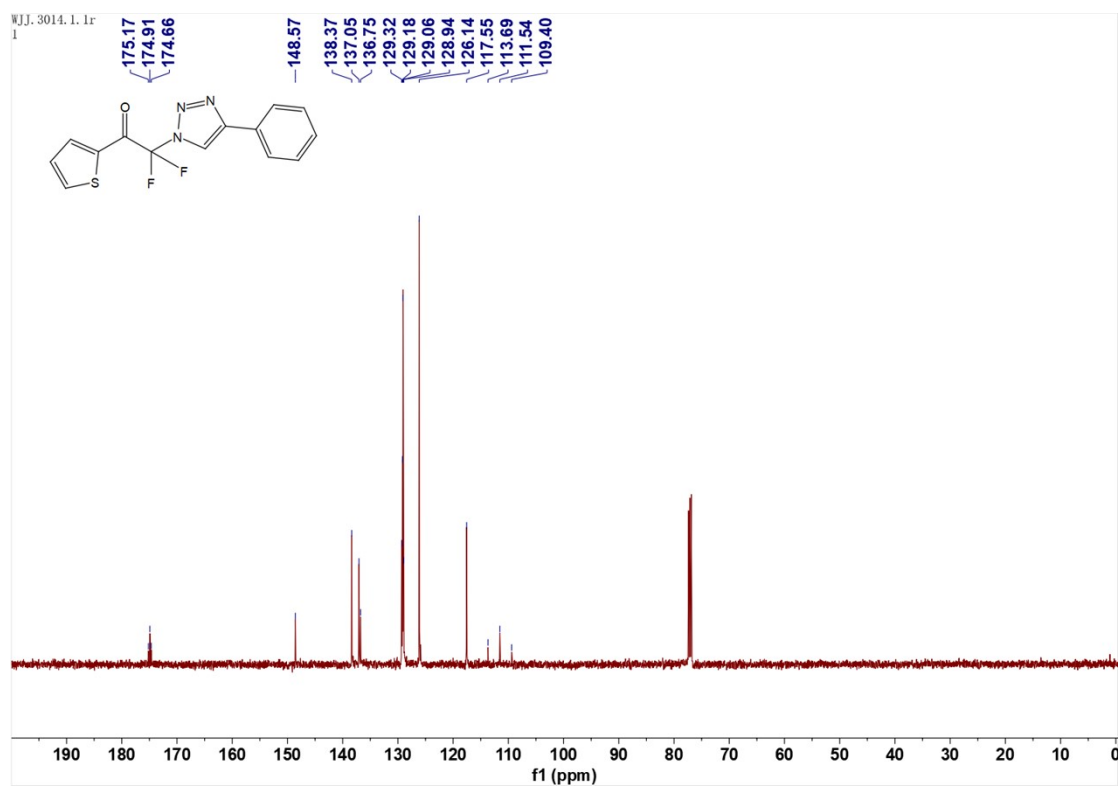

**<sup>13</sup>C NMR spectra of 4qa**

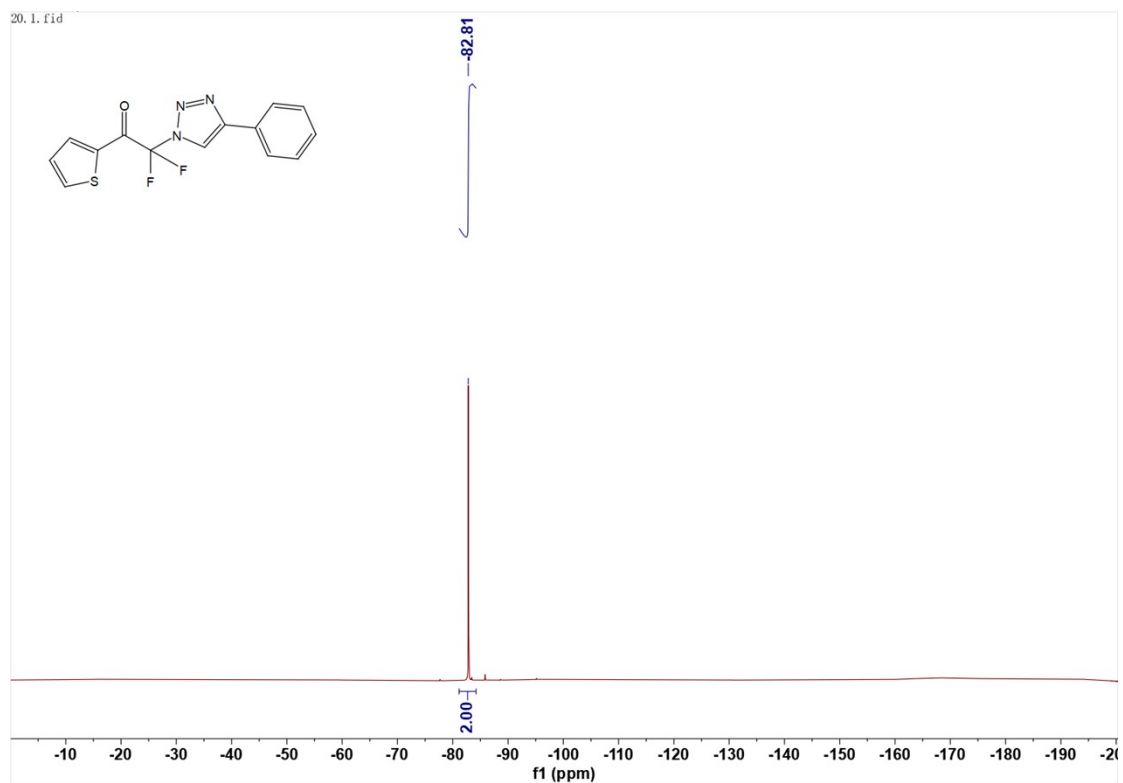

**$^{19}\text{F}$  NMR spectra of 4qa**

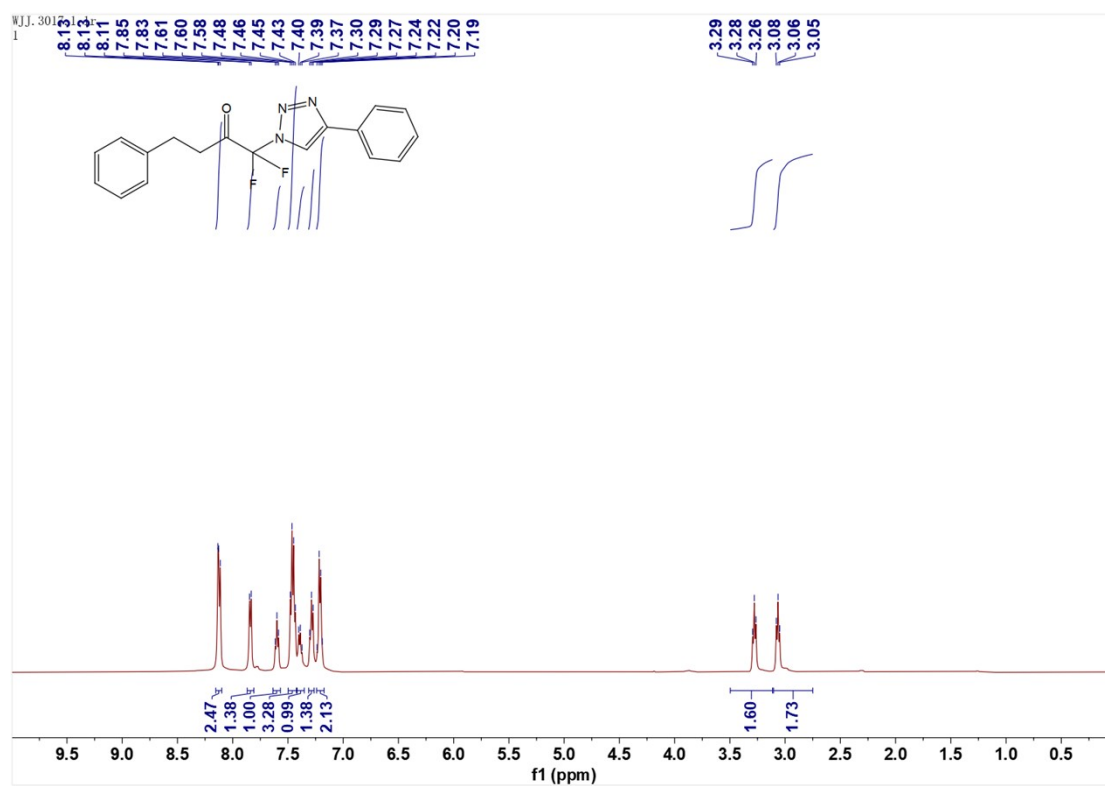

**$^1\text{H}$  NMR spectra of 4ra**

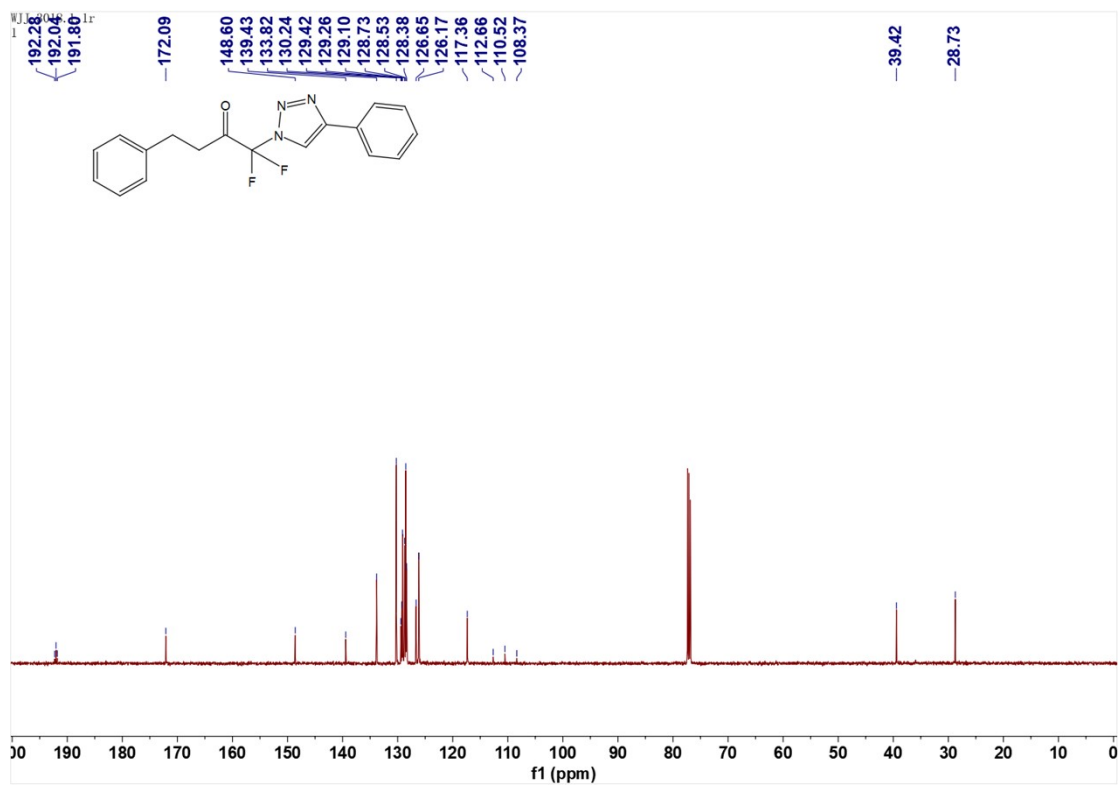

<sup>13</sup>C NMR spectra of 4ra

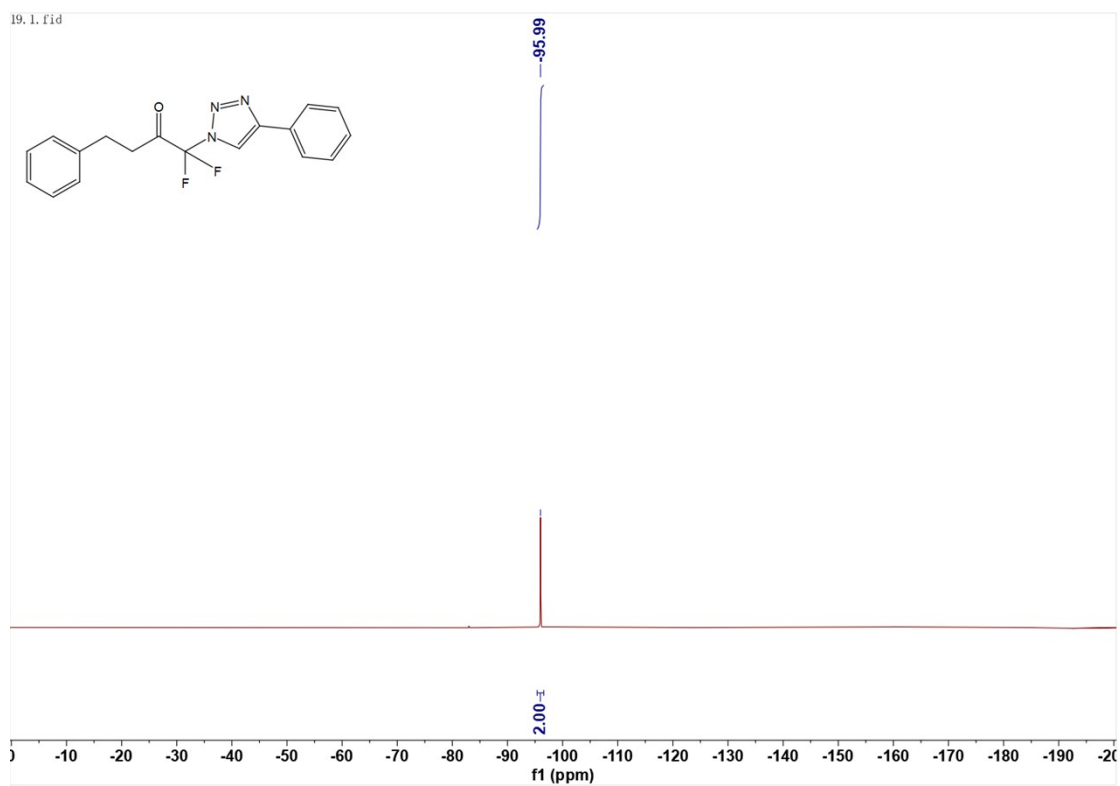

<sup>19</sup>F NMR spectra of 4ra

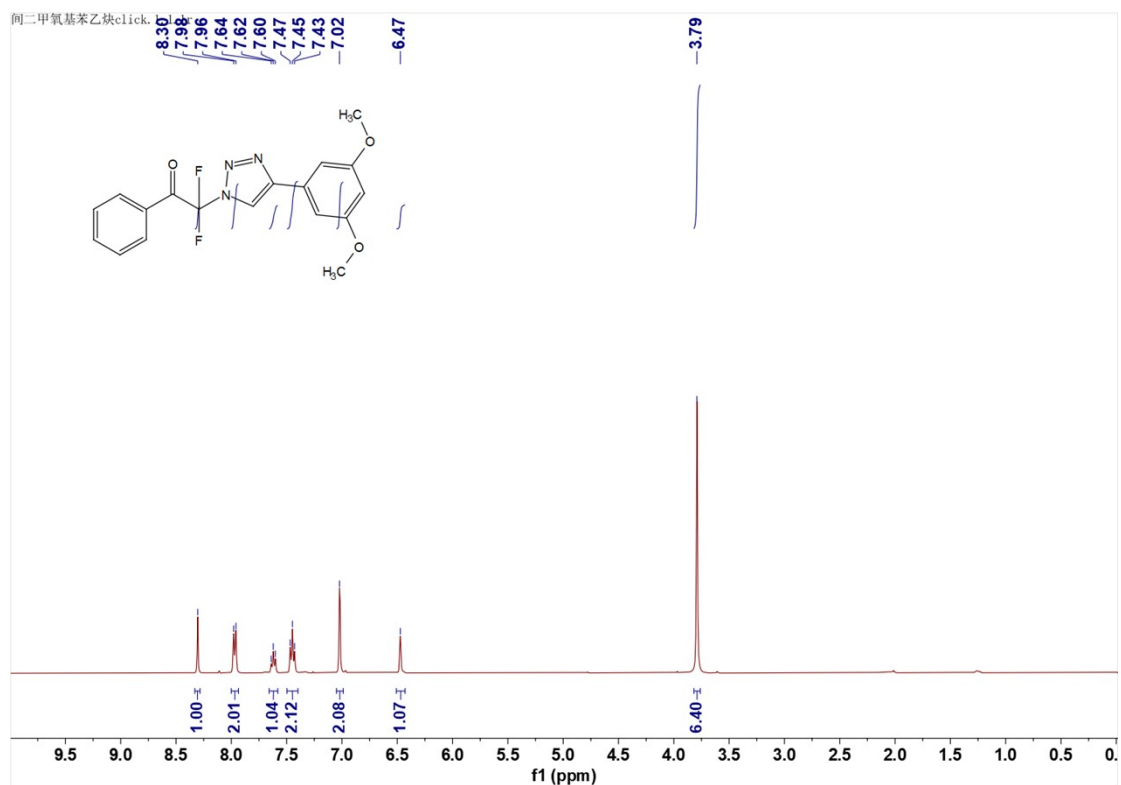

**<sup>1</sup>H NMR spectra of 4ab**

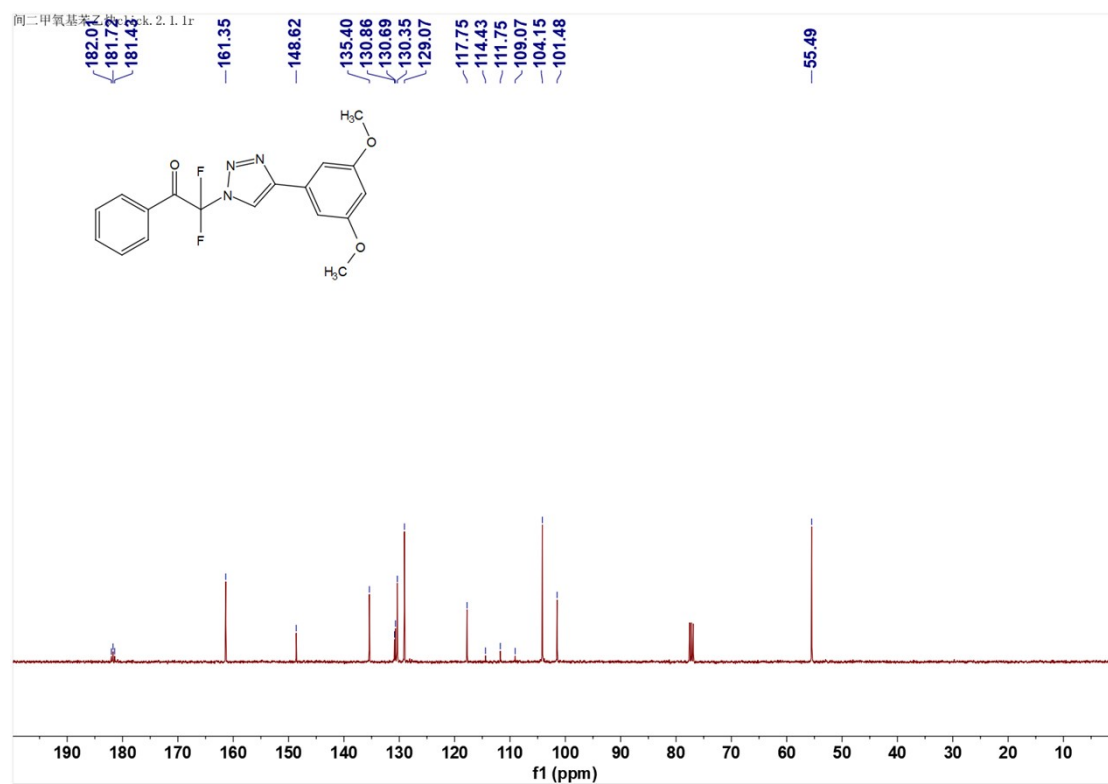

**<sup>13</sup>C NMR spectra of 4ab**

间二甲氧基苯乙炔click.3.1.1r

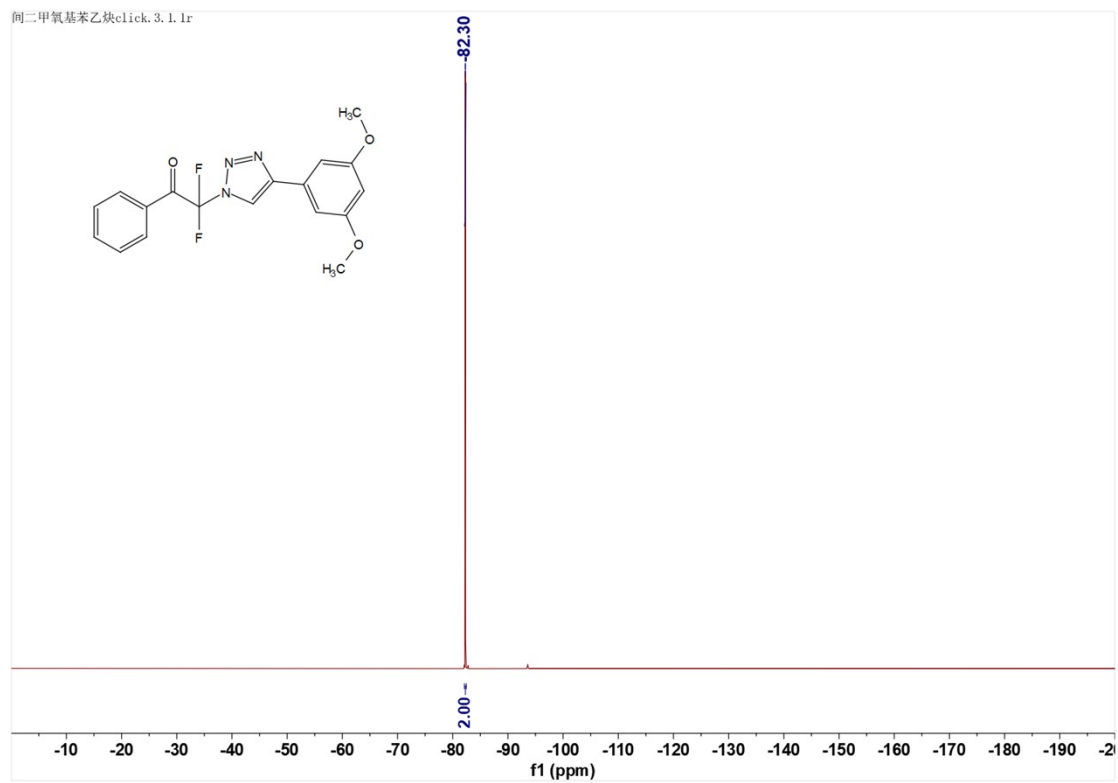

**<sup>19</sup>F NMR spectra of 4ab**

对溴苯乙炔click.1.1.1r

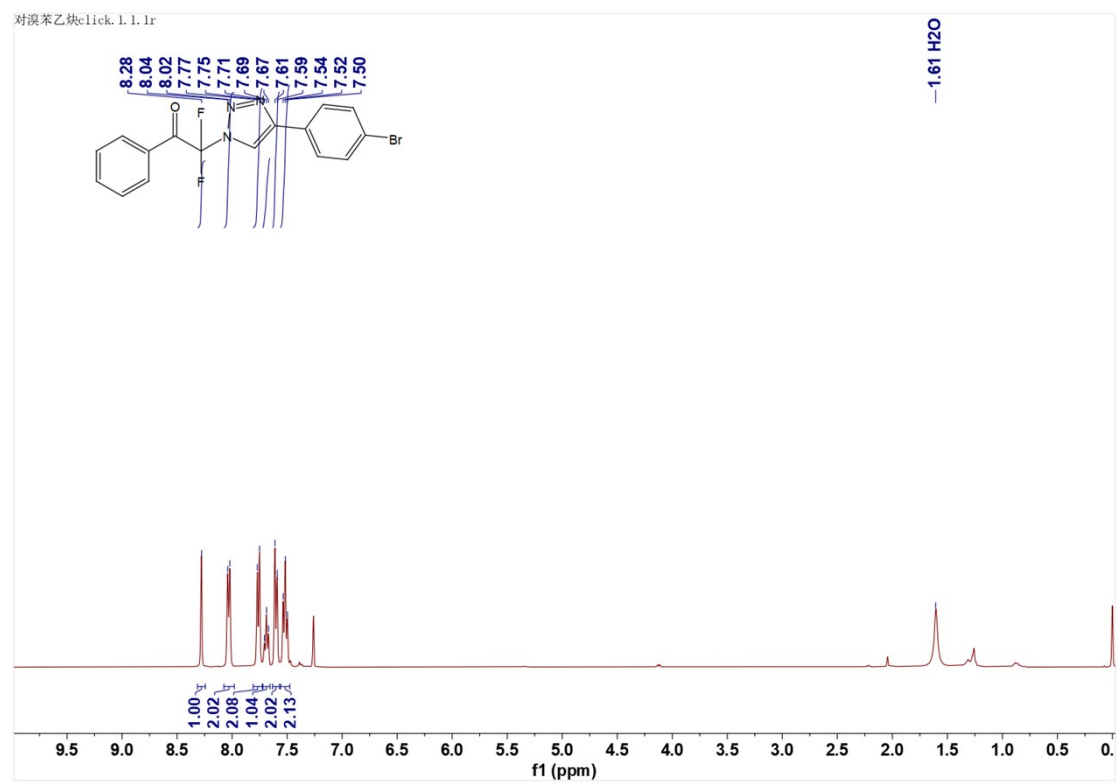

**<sup>1</sup>H NMR spectra of 4ac**

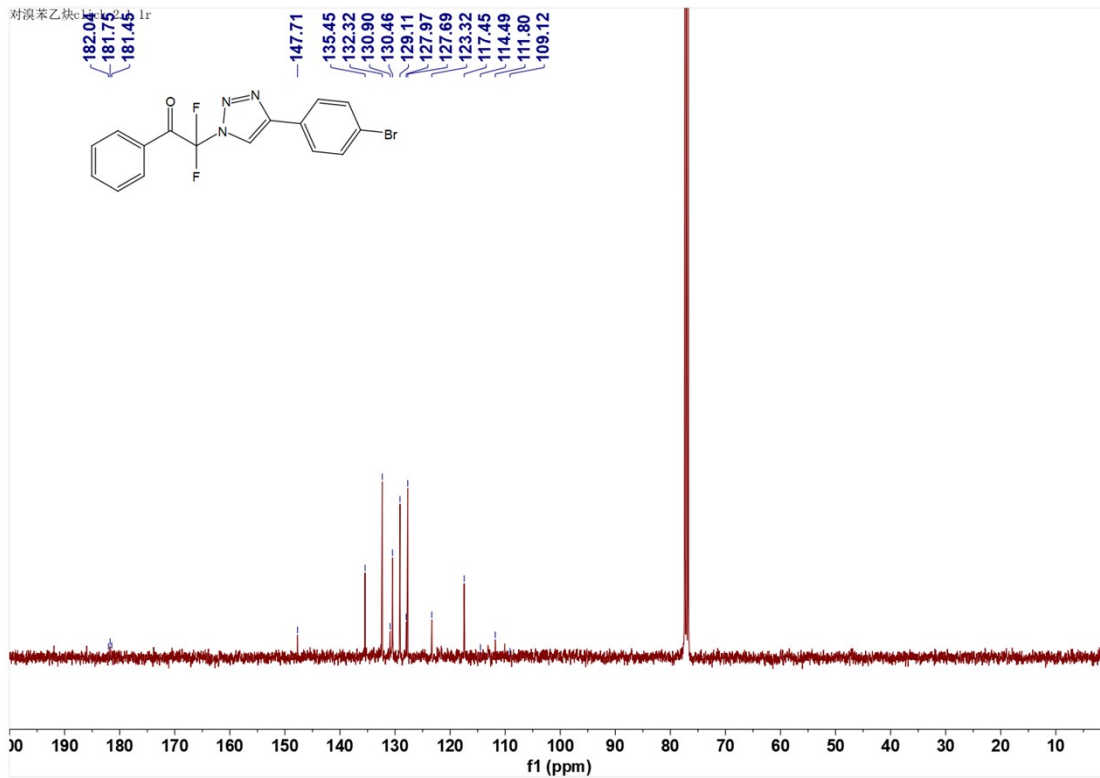

<sup>13</sup>C NMR spectra of 4ac

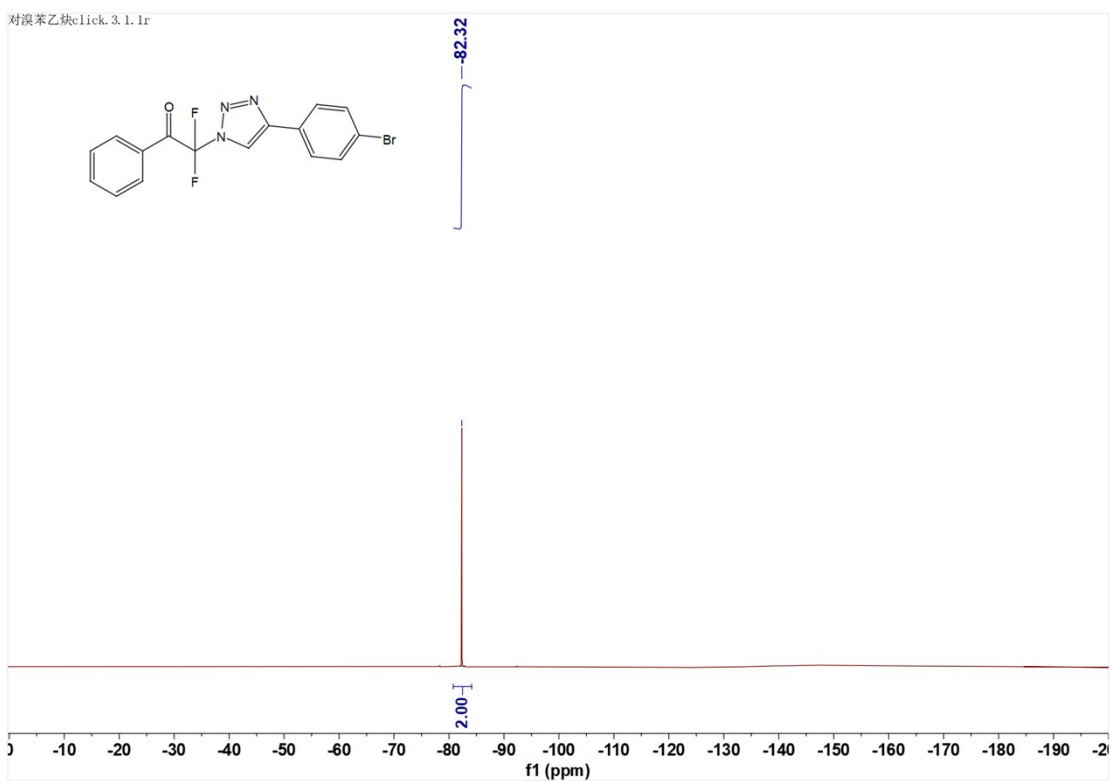

<sup>19</sup>F NMR spectra of 4ac



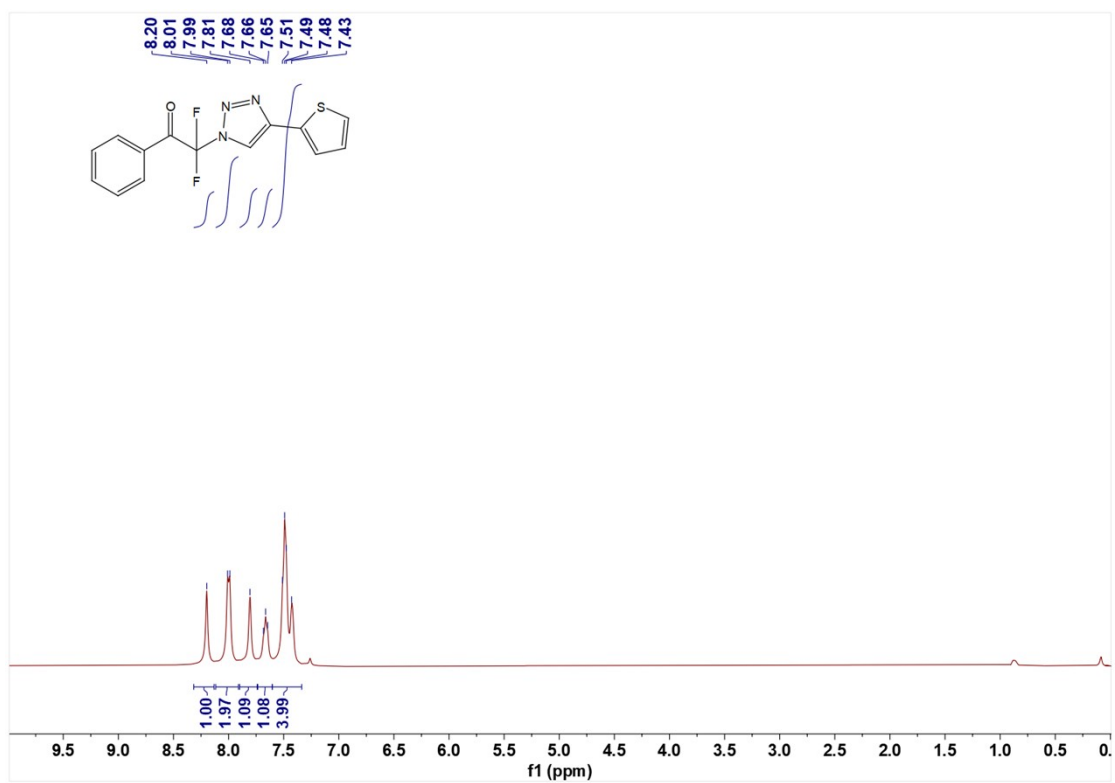

**<sup>1</sup>H NMR spectra of 4ad**

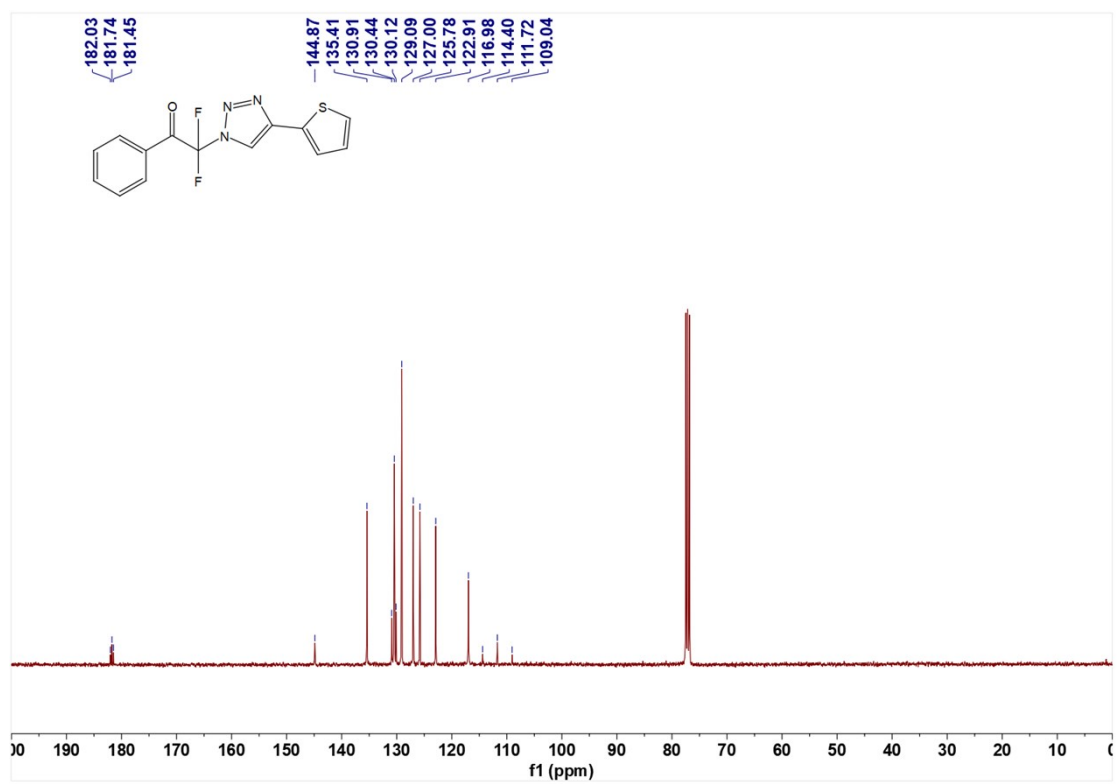

**<sup>13</sup>C NMR spectra of 4ad**

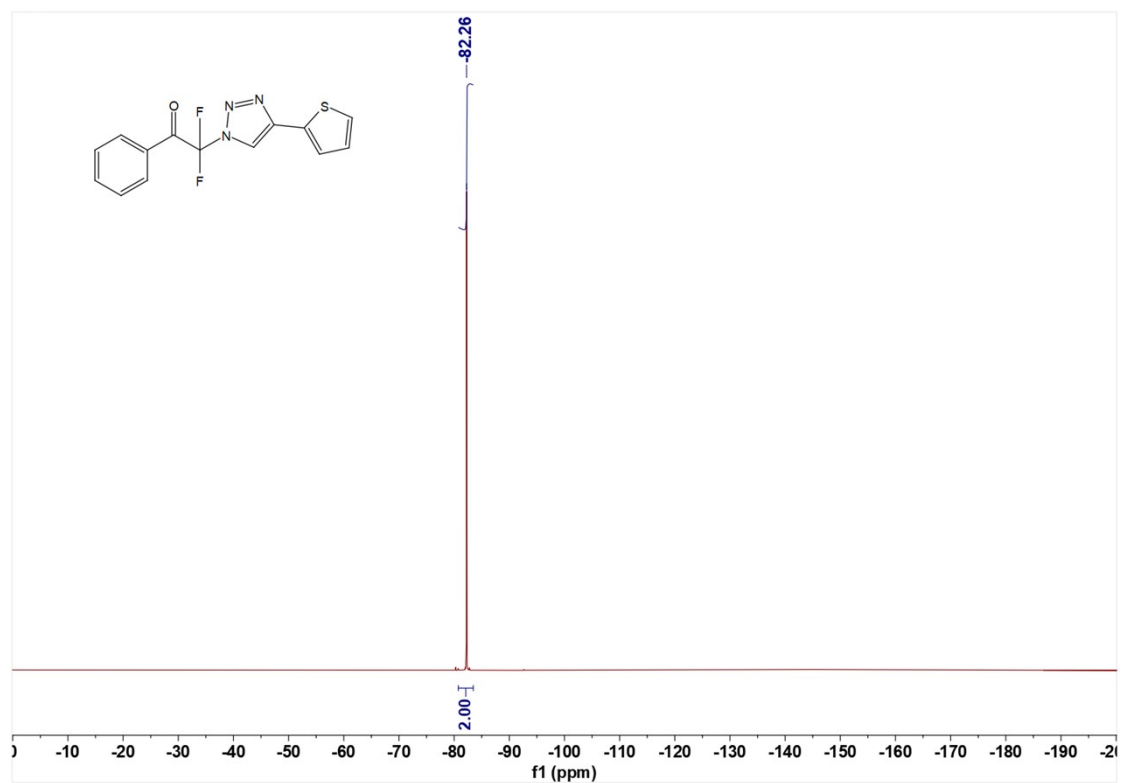

$^{19}\text{F}$  NMR spectra of 4ad

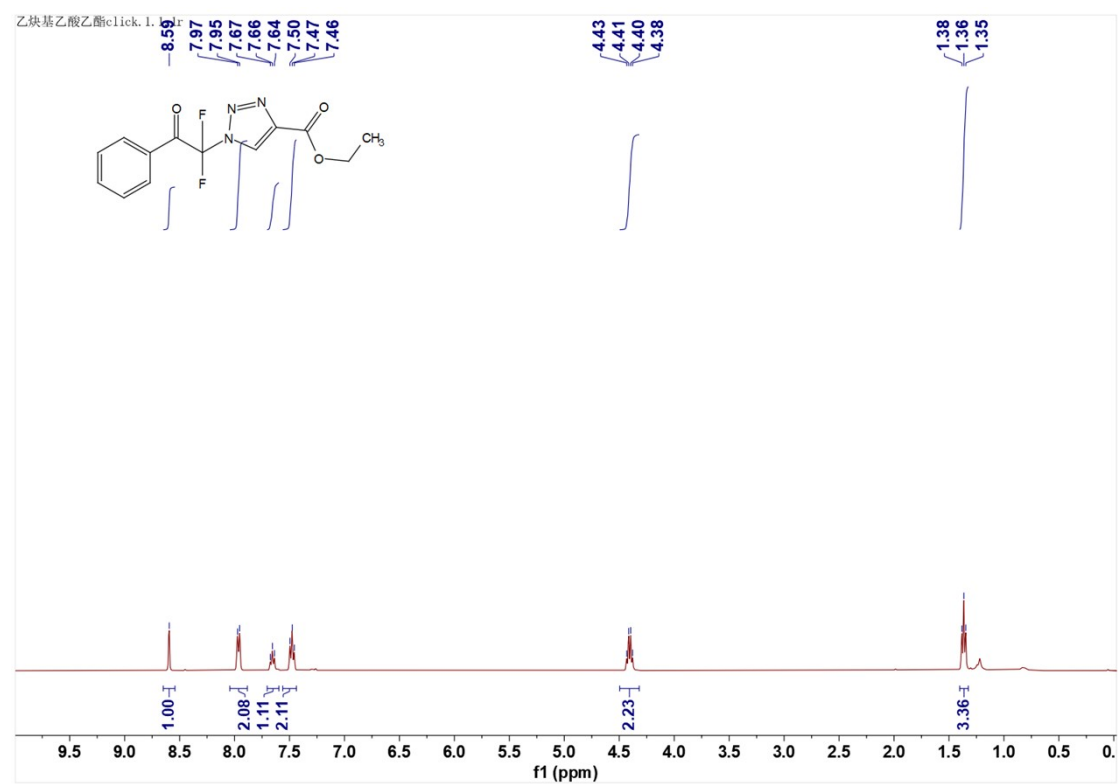

$^1\text{H}$  NMR spectra of 4ae

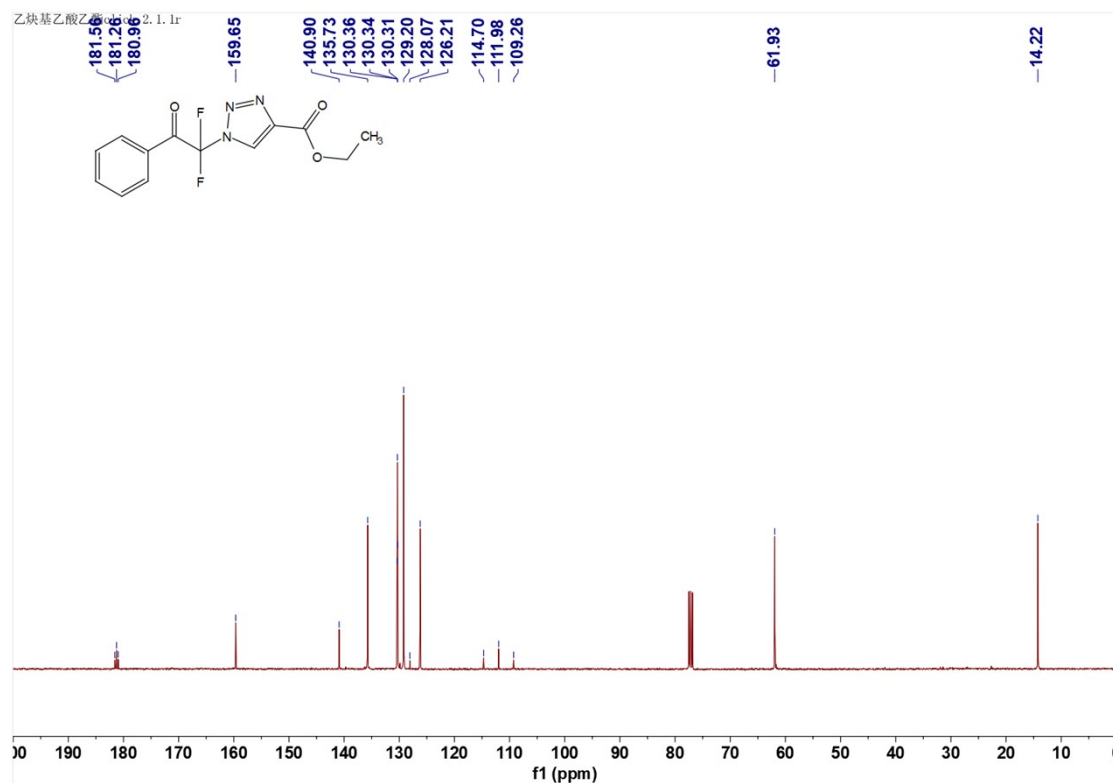

<sup>13</sup>C NMR spectra of 4ae

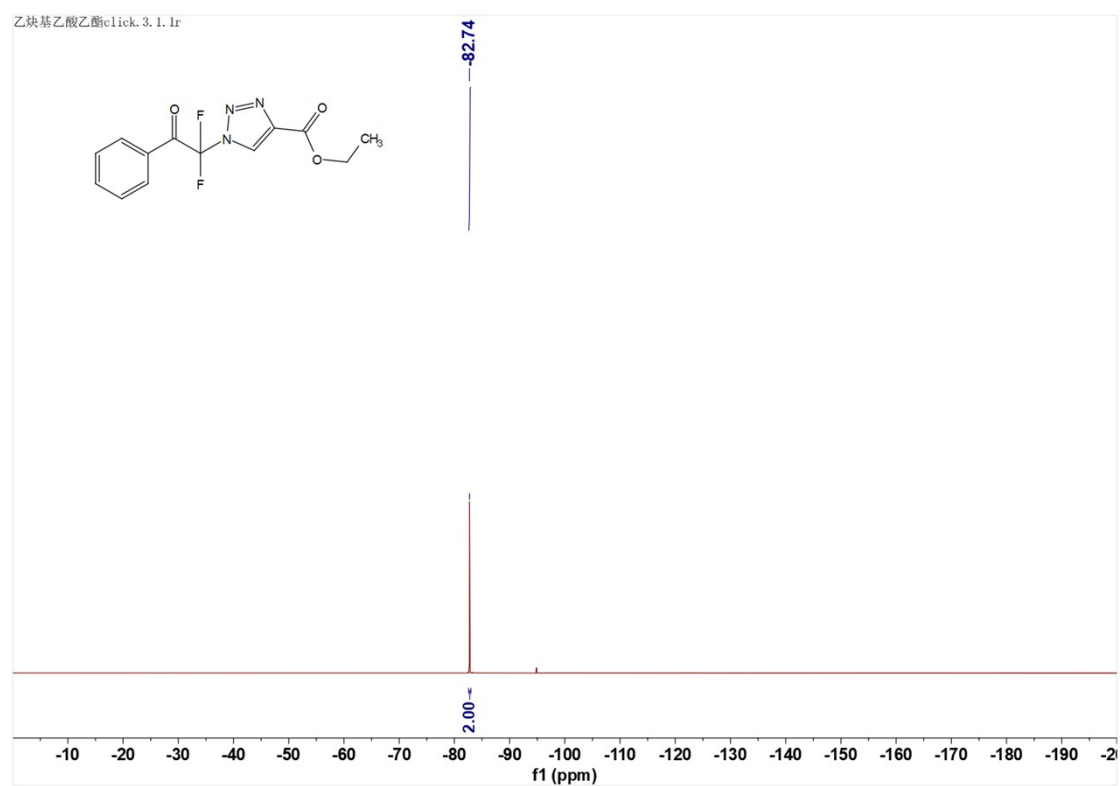

<sup>19</sup>F NMR spectra of 4ae

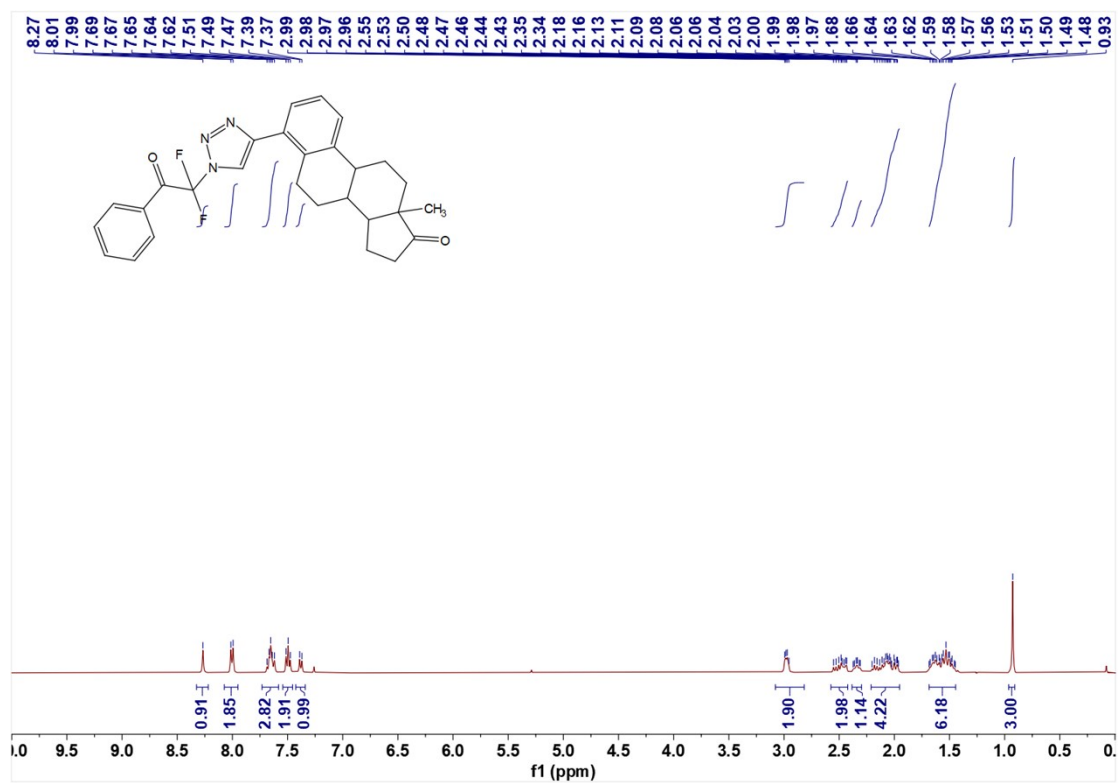

**<sup>1</sup>H NMR spectra of 4af**

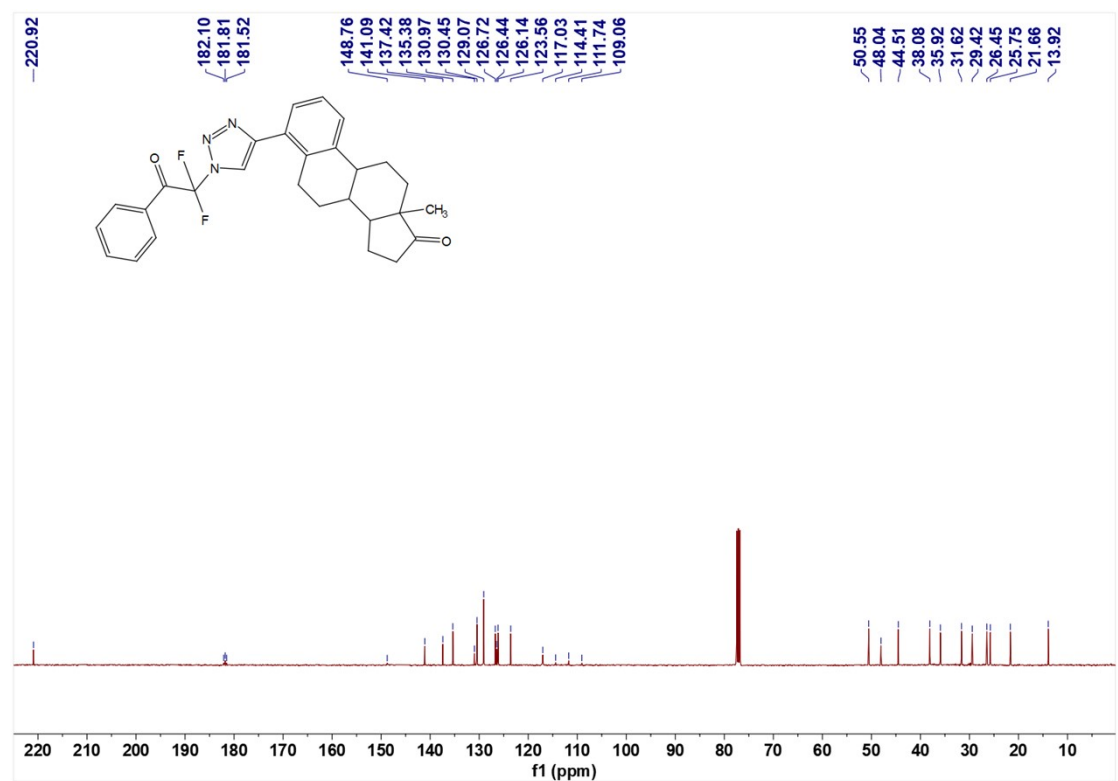

**<sup>13</sup>C NMR spectra of 4af**

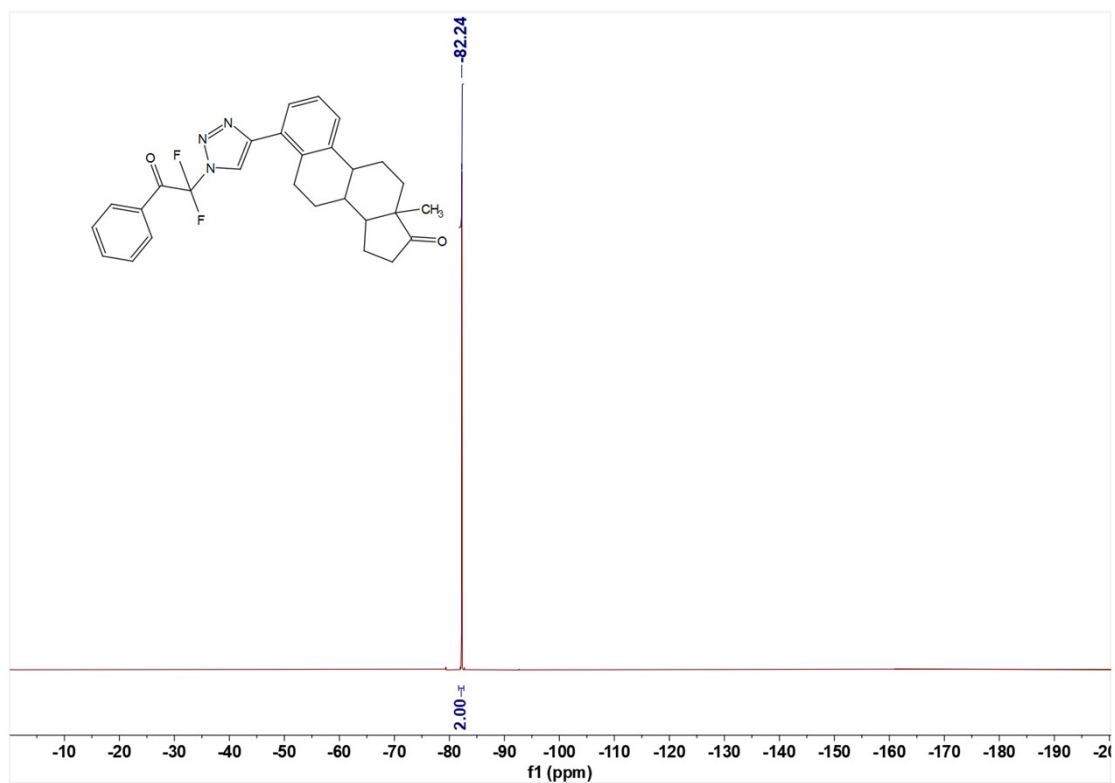

**<sup>19</sup>F NMR spectra of 4af**

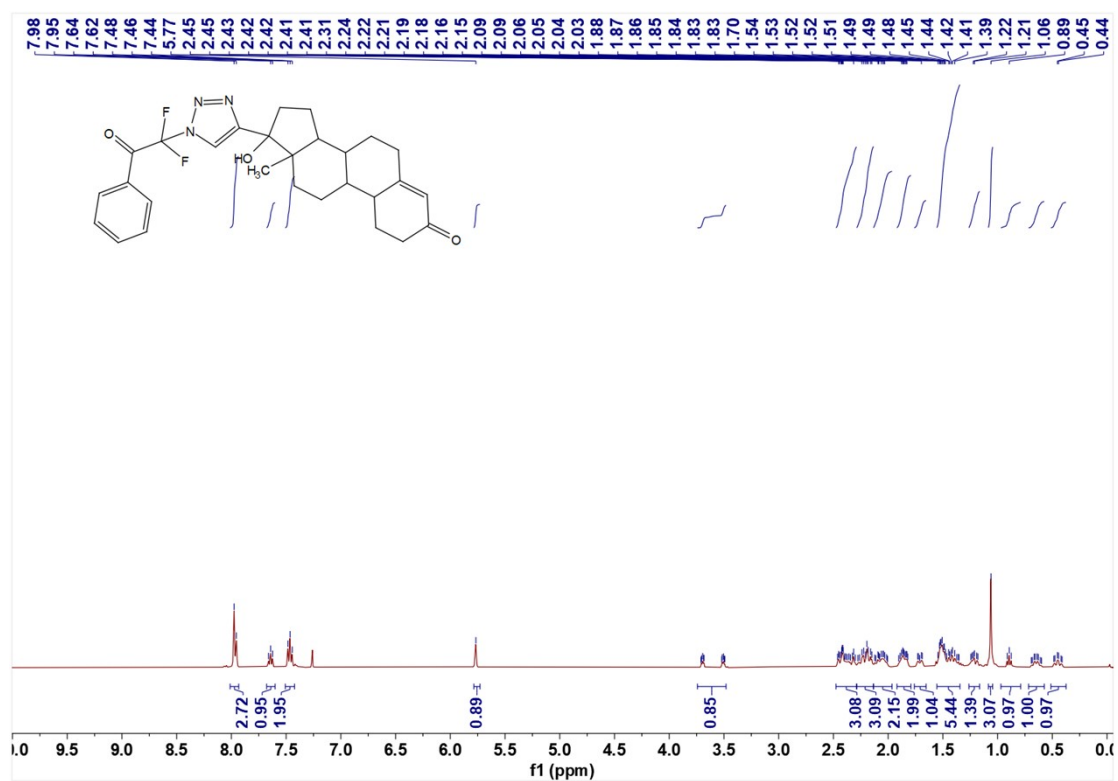

**<sup>1</sup>H NMR spectra of 4ag**

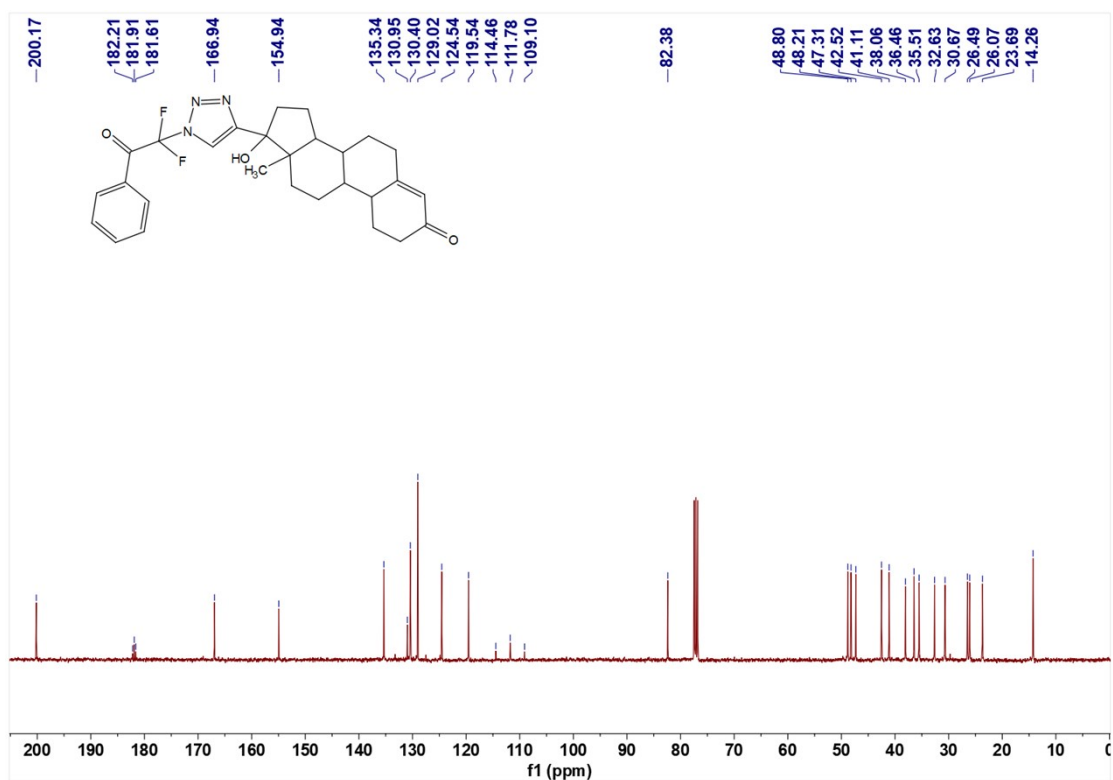

**<sup>13</sup>C NMR spectra of 4ag**

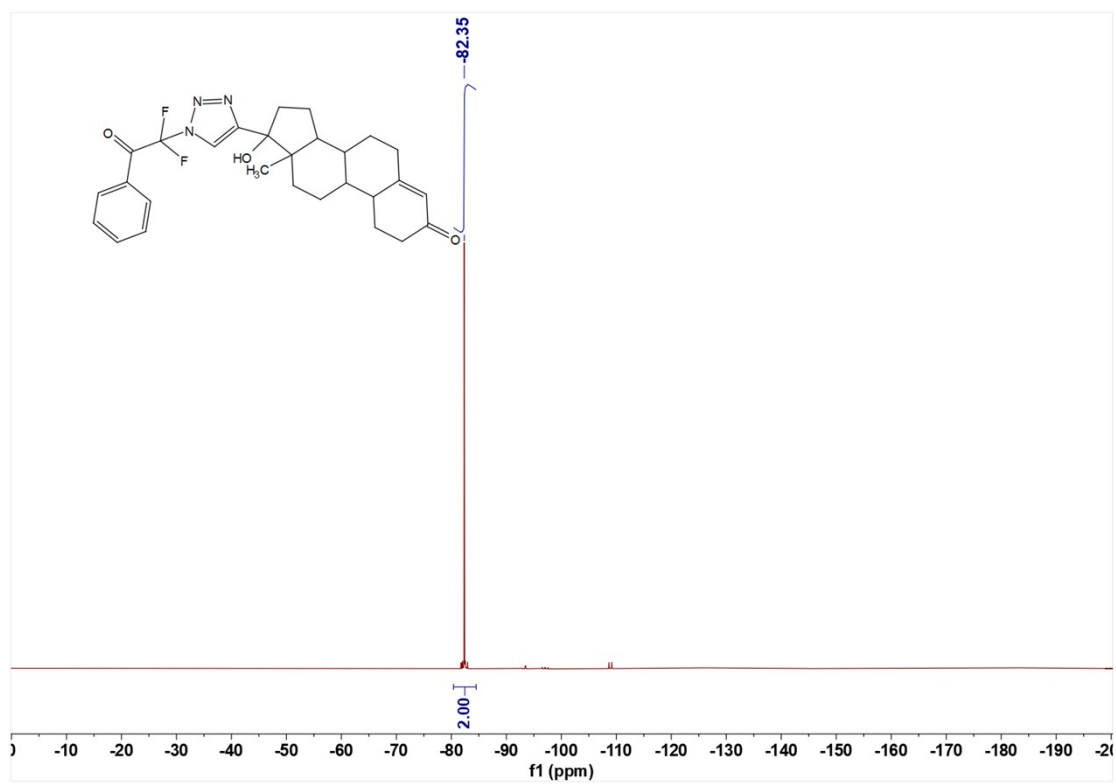

**<sup>19</sup>F NMR spectra of 4ag**

## References

- [S1] (a) V. V. Levin, A. A. Zemtsov, M. I. Struchkova, A. D. Dilman, Reactions of Difluorocarbene with Organozinc Reagents, *Org. Lett.*, 2013, **15**, 917–919; (b) E.-C. Liu, J. J. Topczewski, Enantioselective Copper Catalyzed Alkyne–Azide Cycloaddition by Dynamic Kinetic Resolution, *J. Am. Chem. Soc.*, 2019, **141**, 5135–5138.
- [S2] (a) H. Chen, J. Wang, J. Wu, Y. Kuang, F. Wu, Synthesis of  $\alpha,\alpha$ -difluorobenzoyl oxygen heterocycles via the radical reaction of 2-iodo-2,2-difluoroacetophenones with unsaturated acids or unsaturated alcohols, *Journal of Fluorine Chemistry*, 2017, **200**, 41–46; (b) J. Liang, G. Huang, P. Peng, T. Zhang, J. Wu, F. Wu, Palladium-Catalyzed Benzodifluoroalkylation of Alkynes: A Route to Fluorine-Containing 1,1-Diarylethylenes, *Adv. Synth. Catal.*, 2018, **360**, 2221–2227; (c) J. Liang, J. Han, J. Wu, P. Wu, J. Hu, F. Hu, F. Wu, Nickel-Catalyzed Coupling Reaction of  $\alpha$ -Bromo- $\alpha$ -fluoroketones with Arylboronic Acids toward the Synthesis of  $\alpha$ -Fluoroketones, *Org. Lett.*, 2019, **21**, 6844–6849.
- [S3] T. G. Archibald, K. Baum, Synthesis of fluoro nitro ethers by Michael addition reactions to activated  $\beta,\beta$ -difluoroolefins, *J. Org. Chem.*, 1990, **55**, 3562–3565.
- [S4] Y. Cai, H. Jiang, C. Zhu, MnBr<sub>2</sub>-Catalyzed Aerobic Oxyazidation of Fluoroolefins: Access to Fluoroalkylated  $\beta$ -Hydroxy Aliphatic Azides, *Adv. Synth. Catal.*, 2023, **365**, 342–354.
